# Supplementary material for: Pharmacological interventions for agitated behaviours in patients with traumatic brain injury: a systematic review
Source: PubMed Central journal article supplement — BMJ Open. 2019 Jul 9;9(7):e029604. doi: 10.1136/bmjopen-2019-029604 (PMC6615826; doi:10.1136/bmjopen-2019-029604), 2019-07-09
Supplement: bmjopen-2019-029604.draft_revisions.pdf [file bmjopen-2019-029604.draft_revisions.pdf]

# BMJ Open

BMJ Open is committed to open peer review. As part of this commitment we make the peer review history of every article we publish publicly available.

When an article is published we post the peer reviewers' comments and the authors' responses online. We also post the versions of the paper that were used during peer review. These are the versions that the peer review comments apply to.

The versions of the paper that follow are the versions that were submitted during the peer review process. They are not the versions of record or the final published versions. They should not be cited or distributed as the published version of this manuscript.

BMJ Open is an open access journal and the full, final, typeset and author-corrected version of record of the manuscript is available on our site with no access controls, subscription charges or pay-per-view fees (<http://bmjopen.bmj.com>).

If you have any questions on BMJ Open's open peer review process please email [info.bmjopen@bmj.com](mailto:info.bmjopen@bmj.com)

# BMJ Open

## Pharmacological interventions for agitated behaviors in patients with traumatic brain injury: a systematic review

|                               |                                                                                                                                                                                                                                                                                                                                                                                                                                                                                                                                                                                                                                                                                                                                                                                                                                                                                                                                                                                     |
|-------------------------------|-------------------------------------------------------------------------------------------------------------------------------------------------------------------------------------------------------------------------------------------------------------------------------------------------------------------------------------------------------------------------------------------------------------------------------------------------------------------------------------------------------------------------------------------------------------------------------------------------------------------------------------------------------------------------------------------------------------------------------------------------------------------------------------------------------------------------------------------------------------------------------------------------------------------------------------------------------------------------------------|
| Journal:                      | <i>BMJ Open</i>                                                                                                                                                                                                                                                                                                                                                                                                                                                                                                                                                                                                                                                                                                                                                                                                                                                                                                                                                                     |
| Manuscript ID                 | bmjopen-2019-029604                                                                                                                                                                                                                                                                                                                                                                                                                                                                                                                                                                                                                                                                                                                                                                                                                                                                                                                                                                 |
| Article Type:                 | Research                                                                                                                                                                                                                                                                                                                                                                                                                                                                                                                                                                                                                                                                                                                                                                                                                                                                                                                                                                            |
| Date Submitted by the Author: | 22-Feb-2019                                                                                                                                                                                                                                                                                                                                                                                                                                                                                                                                                                                                                                                                                                                                                                                                                                                                                                                                                                         |
| Complete List of Authors:     | Williamson, David ; Université de Montréal, Pharmacy; Hôpital du Sacré-Coeur de Montréal, Pharmacy<br>Frenette, Anne-Julie; Université de Montréal, Pharmacy; Hôpital du Sacré-Coeur de Montréal, Pharmacy<br>Burry, Lisa; Mount Sinai Hospital Pharmacy Department; University of Toronto Leslie Dan Faculty of Pharmacy<br>Perreault, Marc; Université de Montréal, Pharmacy; McGill University Health Centre, Pharmacy<br>Charbonney, Emmanuel; Université de Montréal Faculté de médecine<br>Lamontagne, François; Université de Sherbrooke, Médecine<br>Potivin, Marie-Julie; Hôpital du Sacré-Coeur de Montréal, Psychologie<br>Giguère, Jean-François; Hôpital du Sacré-Coeur de Montréal, Neurochirurgie; Université de Montréal, Médecine<br>Mehta, Sangeeta; University of Toronto, Department of Medicine, Interdepartmental Division of Critical Care Medicine<br>Bernard, Francis; Hôpital du Sacré-Coeur de Montréal, Critical Care; Université de Montréal, Médecine |
| Keywords:                     | Neurological injury < NEUROLOGY, REHABILITATION MEDICINE, Delirium & cognitive disorders < PSYCHIATRY                                                                                                                                                                                                                                                                                                                                                                                                                                                                                                                                                                                                                                                                                                                                                                                                                                                                               |
|                               |                                                                                                                                                                                                                                                                                                                                                                                                                                                                                                                                                                                                                                                                                                                                                                                                                                                                                                                                                                                     |

SCHOLARONE™  
Manuscripts

1  
2  
3 **1 Pharmacological interventions for agitated behaviors in patients with traumatic**  
4 **2 brain injury: a systematic review**  
5  
6

7 4 David R. Williamson, B.Pharm, M.Sc., Ph.D.<sup>1,2</sup> david.williamson@umontreal.ca  
8 5 Anne Julie Frenette, B.Pharm, M.Sc.<sup>1,2</sup> anne.julie.frenette@umontreal.ca  
9 6 Lisa Burry, B.Sc.Pharm, Pharm.D.<sup>3</sup> lisa.burry@sinaihealthsystem.ca  
10 7 Marc M. Perreault, B.Pharm, M.Sc., Pharm.D.<sup>2,4</sup> marc.perreault@umontreal.ca  
11 8 Emmanuel Charbonney, M.D., Ph.D.<sup>5,6</sup> emmanuel.charbonney@umontreal.ca  
12 9 François Lamontagne, M.D., M.Sc. FRCPC<sup>7</sup> francois.Lamontagne@USherbrooke.ca  
13 10 Marie-Julie Potvin, Ph.D.<sup>8</sup> mjpotvin@gmail.com  
14 11 Jean-François Giguère, M.D., Ph.D. FRSC<sup>6,9</sup> jean-francois.giguere.1@umontreal.ca  
15 12 Sangeeta Mehta, M.D., FRCPC<sup>10</sup> geeta.Mehta@sinaihealthsystem.ca  
16 13 Francis Bernard, M.D. FRCPC<sup>5,6</sup> f.bernard@umontreal.ca  
17  
18

19 15 <sup>1</sup> Pharmacy department and Research center, Hôpital du Sacré-Coeur de Montréal

20 16 <sup>2</sup> Faculté de pharmacie, Université de Montréal

21 17 <sup>3</sup> Department of Pharmacy and Medicine, Sinai Health System and Leslie Dan Faculty of  
22 18 Pharmacy, University of Toronto.

23 19 <sup>4</sup> Department of Pharmacy, McGill University Health Center

24 20 <sup>5</sup> Department of Critical Care and Research center, Hôpital du Sacré-Coeur de Montréal

25 21 <sup>6</sup> Faculté de Médecine, Université de Montréal

26 22 <sup>7</sup> Centre de recherche, CHU de Sherbrooke

27 23 <sup>8</sup> Department of medicine, Faculté de Médecine, Université de Sherbrooke

28 24 <sup>8</sup> Department of Psychology, Hôpital du Sacré-Coeur de Montréal and department of  
29 25 Psychology, Université du Québec à Montréal;

30 26 <sup>9</sup> Department of Neurosurgery, Hôpital du Sacré-Coeur de Montréal

31 27 <sup>10</sup> Department of Medicine, Interdepartmental Division of Critical Care Medicine, Mount  
32 28 Sinai Hospital and University of Toronto  
33  
34  
35

36 30 Corresponding author:

37 31 David Williamson, Ph.D.

38 32 Pharmacy department and research center

39 33 Hôpital du Sacré-Coeur de Montréal

40 34 5400 Gouin West

41 35 Montreal, Quebec

42 36 Canada, H4J 1C5  
43  
44  
45

46 38 **Author Disclosure Statement**

47  
48 39 No competing financial interests exist.  
49

50 40 **Funding**

51  
52 41 The study was supported by a Trauma consortium grant from the Fonds de recherche  
53  
54

55 42 du Québec –Santé  
56  
57  
58  
59  
60

1  
2  
3 43 **Patient and public involvement statement**  
4

5 44 This research was done without patient involvement. Patients were not invited to  
6  
7 45 comment on the study design and were not consulted to develop patient relevant  
8  
9 46 outcomes or interpret the results. Patients were not invited to contribute to the writing or  
10  
11 47 editing of this document for readability or accuracy.  
12  
13  
14

15 48

16  
17 49 **Word count:** 3300 words  
18

19 50  
20  
21  
22  
23  
24  
25  
26  
27  
28  
29  
30  
31  
32  
33  
34  
35  
36  
37  
38  
39  
40  
41  
42  
43  
44  
45  
46  
47  
48  
49  
50  
51  
52  
53  
54  
55  
56  
57  
58  
59  
60

1  
2  
3 **51 Abstract**

4 **52**  
5 **53 Objective:** The aim of this systematic review was to assess the efficacy and safety of  
6  
7  
8 **54** pharmacological agents in the management of agitated behaviors following TBI.

9  
10 **55 Methods:** We performed a search strategy for published and unpublished evidence on  
11  
12 **56** the risks and benefits of 9 pre-specified medications classes used to control agitated  
13  
14 **57** behaviors following TBI. We included all randomized controlled trials, quasi-  
15  
16 **58** experimental and observational studies examining the effects of medications  
17  
18 **59** administered to control agitated behaviors in TBI patients. Included studies were  
19  
20 **60** classified into 3 mutually exclusive categories: 1) agitated behavior was the presenting  
21  
22 **61** symptom; 2) agitated behavior was not the presenting symptom, but was measured as  
23  
24 **62** an outcome variable and; 3) safety of pharmacological interventions administered to  
25  
26 **63** control agitated behaviors was measured.

27  
28  
29  
30 **64 Results:** Among the 181 articles assessed for eligibility, 21 studies were included.  
31  
32 **65** Propranolol, methylphenidate, valproic acid and olanzapine were the only agents  
33  
34 **66** suggesting a potential benefit in reducing agitation, anger or irritability. Small sample  
35  
36 **67** sizes, heterogeneity and an unclear risk of bias were limits.

37  
38  
39 **68 Conclusions:** There is insufficient data to recommend the use of any agent for the  
40  
41 **69** management of agitated behaviors following TBI. More studies on tailored interventions  
42  
43 **70** and continuous evaluation throughout acute, rehabilitation and outpatient settings are  
44  
45 **71** needed.

46  
47  
48  
49 **72**

50  
51 **73 Systematic review registration:** Prospero CRD42016033140

52  
53 **74 Keywords:** Traumatic brain injury, agitation, Pharmacological intervention

54  
55  
56 **75**  
57  
58  
59  
60

1  
2  
3 76 **Strengths and limitations of this study**  
4 77

- 5  
6 78   ▪ This systematic review assessed the efficacy and safety of pharmacological agents  
7  
8  
9 79   in the management of agitated behaviors following traumatic brain injury  
10  
11 80   ▪ Randomized controlled trials, quasi-experimental and observational studies were  
12  
13 81   reviewed  
14  
15 82   ▪ The included studies were limited by small sample sizes, variations in the different  
16  
17 83   agitated behaviors and populations studied  
18  
19 84   ▪ The review found insufficient data to recommend the use of any agent for the  
20  
21 85   management of agitated behaviors following TBI  
22  
23  
24  
25 86

## 87 Introduction

88 Traumatic brain injury (TBI) occurs when an external force is applied to the head leading  
89 to alterations in brain function including decreased level of consciousness, post-  
90 traumatic amnesia, and changes in behavior and cognition that can persist in the long  
91 term. In the United States alone, approximately 50,000 people die each year from TBI  
92 and more than 5 million live with TBI-related disabilities.<sup>1, 2</sup> While TBI has a substantial  
93 impact on direct healthcare costs, indirect costs from lost productivity also represent a  
94 significant economic burden.<sup>3, 4</sup> Agitated behaviors are a frequent behavioural problem  
95 following TBI.<sup>5, 6</sup> They have been broadly defined as a state of confusion that follows the  
96 initial injury and is characterised by disruptive behaviours. A constellation of behaviors  
97 has been associated with the term “agitation” in TBI patients, including restlessness,  
98 confusion, physical and verbal aggression, impulsivity, perceptual disturbances, and  
99 inattention creating a very heterogeneous group of patients to study.<sup>7</sup> Agitation has been  
100 reported in 20-41% of patients during the early stage of recovery in acute care units and  
101 up to 70% of patients in rehabilitation units.<sup>6, 8-13</sup> It can result in harm to patients and  
102 caregivers, interfere with treatments, lead to the use of physical and pharmacological  
103 restraints, increase hospital length of stay, delay rehabilitation and impede functional  
104 independence.<sup>10-12, 14-16</sup> A variety of agents such as antidepressants, anticonvulsants,  
105 stimulants, and antipsychotics have been used for the management of neurobehavioral  
106 complications of TBI.<sup>17, 18</sup> However, preclinical studies have suggested that repeated  
107 use of certain agents such as haloperidol, risperidone and diazepam may reduce  
108 cognitive and functional recovery.<sup>19-22</sup> Thus, it remains unclear which pharmacological  
109 agents are the most effective and safest for the management of agitated behaviors in  
110 TBI patients. A Cochrane Systematic Review published in 2006 showed a lack of

1  
2  
3 111 evidence to support any agent.<sup>23</sup> Since then, two additional systematic reviews  
4  
5 112 concluded that the evidence was insufficient and too weak to recommend any specific  
6  
7 113 agent, however they included only French and English studies published before January  
8  
9 114 2016, had incomplete search strategies, and did not include the grey literature.<sup>24, 25</sup>  
10  
11 115 There is a need for an updated knowledge synthesis in this area that will provide  
12  
13 116 guidance for clinicians and identify knowledge gaps. The aim of this systematic review  
14  
15 117 was to assess the efficacy and safety of pharmacological agents in the management of  
16  
17 118 agitated behaviors following TBI compared to placebo or other treatments.  
18  
19  
20  
21  
22  
23

## 24 120 **Methods**

25  
26  
27 121 The review protocol has been registered in PROSPERO International Prospective  
28  
29 122 Register of Systematic Reviews (CRD42016033140) and published in a peer-reviewed  
30  
31 123 journal.<sup>26</sup> We included all randomized controlled, quasi-experimental, and observational  
32  
33 124 studies with control groups that had a majority (>50%) of patients with TBI. We excluded  
34  
35 125 case reports, case series, and observational studies without control groups. We included  
36  
37 126 studies of all type of patients who suffered a TBI, including children and adults, in both  
38  
39 127 the early stages of recovery and in rehabilitation. We included 3 mutually exclusive  
40  
41 128 types of studies: 1) those evaluating the use of pharmacological interventions in which  
42  
43 129 an agitated behaviour, not further defined, was one of the eligibility criteria for the study;  
44  
45 130 2) those in which an agitated behaviour was not an eligibility criterion, but was measured  
46  
47 131 as an outcome variable; and 3) those specifically assessing the safety of  
48  
49 132 pharmacological agents used to treat agitation in TBI patients. In this systematic review,  
50  
51 133 we considered agitation, aggressiveness, assaultive behaviour, irritability and confusion  
52  
53  
54  
55  
56  
57  
58  
59  
60



1  
2  
3 134 as part of agitated behaviours. All medications considered in this review were pre-  
4  
5 135 specified and consisted in the following: beta-adrenergic blockers, typical and atypical  
6  
7 136 antipsychotics, anticonvulsants, dopamine agonists, psychostimulants, antidepressants,  
8  
9  
10 137 alpha-2-adrenergic agonists, hypnotics and anxiolytics. Studies were included whether  
11  
12 138 the investigators compared a medication to placebo, a medication to another  
13  
14 139 medication, or various combinations of different medications.

15  
16  
17  
18 140 The primary outcome was a reduction in severity of the agitated behavior as measured  
19  
20 141 in each study. If feasible, we reported resolution of agitated behaviours as well as  
21  
22 142 changes in duration and type of symptoms (confusion, aggressiveness, inattention,  
23  
24 143 hallucinations, disorientation, and inappropriate mood or speech). Secondary outcomes  
25  
26 144 include lengths of stay, (ICU length of stay, hospital LOS for the early rehabilitation  
27  
28 145 phase), adverse events (extrapyramidal effects, QTc prolongation, cardiac arrhythmias,  
29  
30 146 hypotension, seizures, behavioural effects), use of physical restraints in ICU, cognitive  
31  
32 147 and functional outcomes at hospital discharge and at one year post-TBI.

### 33 34 35 36 37 148 *Search strategy*

38  
39  
40  
41 149 A search strategy was devised with the help of Health Sciences librarian and using the  
42  
43 150 Peer Review for Electronic Search Strategies (PRESS) checklist was conducted in the  
44  
45 151 following databases: PubMed, OvidMEDLINE®, OvidMEDLINE® In-Process & Other Non-  
46  
47 152 Indexed Citations, Embase, CINAHL, PsycINFO, Cochrane Library, Google Scholar,  
48  
49 153 Directory of Open Access Journals, LILACS, Web of Science and Prospero  
50  
51 154 (<http://www.crd.york.ac.uk/PROSPERO/>).<sup>27</sup> A grey literature search was also performed  
52  
53 155 using the resources suggested in CADTH's *Grey Matters*

1  
2  
3 156 (<http://www.cadth.ca/en/resources/finding-evidence-is/grey-matters>). As described in our  
4  
5 157 published protocol, we searched abstracts from annual scientific meetings from relevant  
6  
7 158 groups in the last 5 years.<sup>26</sup> Finally, references of identified studies as well as other  
8  
9  
10 159 types of articles (reviews, book chapters) were screened.  
11

12 160  
13  
14 161 *Data collection and analysis*  
15  
16 162 Two reviewers (DW, AJF) independently screened titles and abstracts for eligible  
17  
18 163 publications. The same reviewers then assessed the complete report of each retained  
19  
20 164 citations for eligibility. Disagreements were resolved by consensus and discussion with a  
21  
22 165 third reviewer was not required. In the absence of important clinical and methodological  
23  
24 166 heterogeneity, we planned to analyze the study results for statistical heterogeneity. If the  
25  
26 167 statistical heterogeneity was acceptable ( $I_2 < 50\%$ ), we planned to proceed to a meta-  
27  
28 168 analysis.<sup>26</sup>  
29  
30  
31  
32

### 33 169 34 35 170 *Data extraction and management* 36

37  
38 171 Data from all included studies were extracted by two independent reviewers (AJF and  
39  
40 172 DW) and in duplicate using a pre-tested data extraction form. The following variables  
41  
42 173 were recorded for each study: study title, name of the first author, year of publication,  
43  
44 174 country of origin, language of publication, publication type (journal article, conference  
45  
46 175 proceeding, abstract, thesis), clinical setting (intensive care unit, hospital ward,  
47  
48 176 rehabilitation unit, outpatient), study design (randomized controlled, blinded or open,  
49  
50 177 non-randomized controlled, prospective or retrospective, crossover), population  
51  
52 178 (paediatric, adult), patient characteristics (age, gender, isolated TBI or multiple trauma  
53  
54  
55  
56  
57  
58  
59  
60

1  
2  
3 179 including TBI, severity of TBI according to Glasgow Coma Scale, days from TBI at  
4  
5 180 inclusion, inclusion and exclusion criteria), characteristics of the intervention and control  
6  
7 181 treatment (type of pharmacological agent, dose, frequency and duration of the therapy),  
8  
9  
10 182 agitation measurement tool, description of the specific agitated behaviours (definition,  
11  
12 183 frequency, duration), and clinical outcomes (length of stay), adverse events, use of  
13  
14 184 physical restraints during ICU stay, duration of post traumatic amnesia, cognitive  
15  
16  
17 185 function at ICU discharge and at one year, and functional outcome at ICU discharge and  
18  
19 186 at one year. We contacted the corresponding author for clarifications when necessary.  
20  
21  
22  
23  
24

### 25 188 *Assessment of risk of bias*

26  
27 189 Two reviewers (DW, AJF) independently evaluated each included study with the  
28  
29 190 Cochrane Collaboration tool for randomized controlled trials and the Ottawa-Newcastle  
30  
31 191 tool for observational studies, respectively.<sup>28, 29</sup> In case of disagreement concerning the  
32  
33 192 risk of bias, a third reviewer (FB) was consulted to resolve the issue.  
34  
35  
36  
37  
38

## 39 194 **Results**

### 40 195 *Study selection*

41 196  
42 197  
43 198  
44 199 The database search (up to December 10th 2018) retrieved 11 170 unique citations of  
45  
46 200 which 10 989 were excluded based on title and abstracts (Figure 1). We assessed 181  
47  
48 201 full-text articles for eligibility and 21 studies were included. A total of eight studies  
49  
50 202 evaluated the use of pharmacological interventions in which an agitated behaviour was  
51  
52 203 the presenting symptom or one of the presenting symptoms.<sup>30-37</sup> In nine other studies,  
53  
54 204 agitated behaviour was not the presenting symptom, but was measured as an outcome  
55  
56  
57  
58  
59  
60

1  
2  
3 205 variable.<sup>38-46</sup> Finally, four studies specifically assessed the safety of pharmacological  
4  
5 206 agents used for agitated behaviours in TBI.<sup>47-50</sup>  
6

7  
8 207 *Agitated behaviors as the presenting symptom*  
9

10 208  
11 209 The eight included studies evaluated various aspects ranging from aggressiveness to  
12  
13 210 irritability and confusion (Table 1).<sup>30-37</sup>. The behaviors were evaluated using the following  
14  
15 211 tools (Table 2): agitated behavior scale (ABS), confusion assessment protocol, State-  
16  
17 212 Trait Anger scale, the overt aggression scale, Richmond Agitation Sedation Scale  
18  
19 213 (RASS) and neuropsychiatric inventory irritability and aggression domains (NPI-I and  
20  
21 214 NPI-A).<sup>51</sup>  
22  
23  
24  
25  
26  
27  
28  
29  
30  
31  
32  
33  
34  
35  
36  
37  
38  
39  
40  
41  
42  
43  
44  
45  
46  
47  
48  
49  
50  
51  
52  
53  
54  
55  
56  
57  
58  
59  
60

216 **Table 1 – Study characteristics**

| Study/Year<br>(N)                               | Publication/<br>Country | Study design           | Study focus                    | Interventional<br>arm                | Comparative<br>arm | Location at<br>randomization                                      | Timing from TBI<br>at randomization            | TBI<br>description            |
|-------------------------------------------------|-------------------------|------------------------|--------------------------------|--------------------------------------|--------------------|-------------------------------------------------------------------|------------------------------------------------|-------------------------------|
| 1. Agitated behaviour as the presenting symptom |                         |                        |                                |                                      |                    |                                                                   |                                                |                               |
| Brooke <sup>30</sup><br>1992<br>N=21            | Published<br>USA        | RCT parallel           | Agitation                      | Propranolol 60-<br>420mg daily       | Placebo            | Level 1 trauma<br>and<br>rehabilitation<br>center                 | N/A                                            | Severe blunt<br>TBI           |
| Mooney <sup>31</sup><br>1993<br>N=38            | Published<br>USA        | Randomized<br>Pre-post | Anger                          | Methylphenidate<br>30mg/day          | Placebo            | Outpatient                                                        | 6 months or<br>more (mean 27<br>+/- 21 months) | Severe blunt<br>TBI           |
| Yablon<br>2010 <sup>32</sup><br>N=79            | Abstract<br>USA         | RCT parallel           | Confusion                      | Amantadine<br>100mg bid X 14<br>days | Placebo            | Inpatient brain<br>injury unit of a<br>rehabilitation<br>hospital | ≤ 6 months                                     | TBI not<br>further<br>defined |
| Hammond <sup>34</sup><br>2014<br>N=76           | Published<br>USA        | RCT parallel           | Irritability and<br>aggression | Amantadine<br>100mg bid              | Placebo            | Outpatient                                                        | ≥ 6 months<br>following a TBI                  | Blunt TBI                     |
| Beresford <sup>30</sup>                         | Abstract                | RCT parallel           | Agitation                      | Valproic acid                        | Placebo            | Outpatient                                                        | > 1 year                                       | Mild and                      |

|                                                    |                         |                                |                                                           |                                                     |                    |                              |                                     |                               |
|----------------------------------------------------|-------------------------|--------------------------------|-----------------------------------------------------------|-----------------------------------------------------|--------------------|------------------------------|-------------------------------------|-------------------------------|
| 2015<br>N=50                                       | USA                     |                                |                                                           | for level 50-100<br>mcg/ml                          |                    |                              | following TBI                       | moderate<br>TBI               |
| Hammond <sup>33</sup><br>2015<br>N=168             | Published<br>USA        | RCT parallel                   | Irritability and<br>aggression                            | Amantadine<br>100mg bid                             | Placebo            | Outpatient                   | ≥ 6 months<br>following a TBI       | Blunt TBI                     |
| Maturana <sup>37</sup><br>Waidele<br>2009<br>N=31  | Published<br>Chili      | Prospective<br>double-blind    | Restlessness,<br>Irritability,<br>Aggression,<br>Insomnia | Olanzapine<br>(dose not<br>specified)               | Placebo            | Outpatient                   | N/A                                 | TBI not<br>further<br>defined |
| Gramish <sup>35</sup><br>2017<br>N=139             | Published<br>USA        | Retrospective<br>observational | Agitation                                                 | Amantadine<br>100mg bid                             | No<br>amantadine   | Adult Trauma<br>ICU          | Acute TBI                           | TBI not<br>further<br>defined |
| 2. Agitated behavior is not the presenting symptom |                         |                                |                                                           |                                                     |                    |                              |                                     |                               |
| Study/Year<br>(N)                                  | Publicatio<br>n/Country | Study design                   | Study focus                                               | Interventional<br>arm                               | Comparative<br>arm | Location at<br>randomization | Timing from TBI<br>at randomization | TBI<br>description            |
| Schneider <sup>41</sup><br>1999<br>N=10            | Published<br>USA        | RCT parallel                   | Cognitive<br>function and<br>behavior                     | Amantadine<br>50mg bid<br>increased to<br>150mg bid | Placebo            | Outpatient                   | N/A                                 | Moderate<br>and severe<br>TBI |

|                                                                           |                                         |                  |                                       |                                 |         |                                     |                                                          |                                                |
|---------------------------------------------------------------------------|-----------------------------------------|------------------|---------------------------------------|---------------------------------|---------|-------------------------------------|----------------------------------------------------------|------------------------------------------------|
| Meythaler <sup>40</sup><br>2001 N=9                                       | Published<br>USA                        | RCT<br>Crossover | Recovery and<br>arousal               | Sertraline                      | Placebo | Inpatient<br>rehabilitation         | < 2 weeks of<br>TBI                                      | Severe TBI                                     |
| Meythaler <sup>42</sup><br>2002<br>N=35                                   | Published<br>USA                        | RCT<br>Crossover | Neurological<br>recovery              | Amantadine                      | Placebo | Emergency<br>department             | Between 4 days<br>and 6 weeks<br>following TBI           | Severe blunt<br>TBI                            |
| Banos <sup>38</sup><br>2010<br>N=99                                       | Published<br>USA                        | RCT parallel     | Cognitive<br>function and<br>behavior | Sertraline                      | Placebo | Level 1 trauma<br>center inpatients | < 8 weeks of<br>TBI                                      | Moderate<br>and severe<br>TBI                  |
| Giacino <sup>39</sup><br>2012<br>N=184                                    | Published<br>USA,<br>Denmark,<br>Canada | RCT parallel     | Functional<br>recovery                | Amantadine                      | Placebo | Inpatients                          | 4 to 16 weeks<br>following TBI                           | Vegetative or<br>minimally<br>conscious<br>TBI |
| Tramontana <sup>43</sup><br>2014<br>N=22 but 13<br>completed the<br>study | Published<br>USA                        | RCT<br>Crossover | Attention                             | Lisdexampheta-<br>mine          | Placebo | Outpatient                          | 6-34 months<br>(mean 15.6 +/-<br>10 months)<br>since TBI | Moderate<br>and severe<br>TBI                  |
| Johansson <sup>45</sup><br>2014                                           | Published<br>Sweden                     | RCT<br>Crossover | Mental fatigue<br>and cognition       | Methylphenidate<br>5mg and 20mg | Placebo | Outpatient                          | > 12 months<br>following TBI                             | Mild or<br>moderate                            |

|                                                                                               |                  |                                |                                           |                                                       |                                 |                                                          |                      |                                 |
|-----------------------------------------------------------------------------------------------|------------------|--------------------------------|-------------------------------------------|-------------------------------------------------------|---------------------------------|----------------------------------------------------------|----------------------|---------------------------------|
| N=48                                                                                          |                  |                                |                                           | tid                                                   |                                 |                                                          |                      | TBI                             |
| Fann <sup>44</sup><br>2017<br>N=62                                                            | Published<br>USA | RCT parallel                   | Major<br>depression                       | Sertraline                                            | Placebo                         | Level 1 trauma<br>center                                 | < 1 year of TBI      | Moderate<br>and severe<br>TBI   |
| Hart <sup>46</sup><br>2017<br>N=32                                                            | Published<br>USA | RCT parallel                   | Cognitive<br>function                     | Dextroampheta<br>mine                                 | Placebo                         | TBI<br>rehabilitation<br>unit                            | < 6 months of<br>TBI | Moderate<br>and severe<br>TBI   |
| 3. Studies assessing the safety of pharmacological agents used for agitated behaviours in TBI |                  |                                |                                           |                                                       |                                 |                                                          |                      |                                 |
| Rao 1985 <sup>49</sup><br>N=26                                                                | Published<br>USA | Retrospective<br>observational | Rehabilitation<br>outcomes                | Haloperidol                                           | No<br>haloperidol               | Trauma and<br>rehabilitation<br>center                   | From admission       | Severe<br>closed head<br>injury |
| Mysiw <sup>48</sup><br>2006<br>N=182                                                          | Published<br>USA | Retrospective<br>cohort        | Cognitive and<br>motor recovery           | Narcotics,<br>benzodiazepine<br>s and<br>neuroleptics | No CNS<br>active<br>medications | Level 1 trauma<br>center and<br>rehabilitation<br>center | From admission       | TBI                             |
| Kooda <sup>50</sup><br>2015<br>N=195                                                          | Abstract<br>USA  | Retrospective<br>observational | Duration of post-<br>traumatic<br>amnesia | Antipsychotics                                        | No<br>antipsychotic             | Level 1 trauma<br>center and<br>rehabilitation<br>center | From admission       | TBI                             |
| Anderson <sup>47</sup>                                                                        | Published        | Retrospective                  | Seizures,                                 | Haloperidol                                           | No                              | Inpatients                                               | From admission       | Moderate                        |



1  
2  
3  
4  
5  
6  
7  
8  
9  
10  
11  
12  
13  
14  
15  
16  
17  
18  
19  
20  
21  
22  
23  
24  
25  
26  
27  
28  
29  
30  
31  
32  
33  
34  
35  
36  
37  
38  
39  
40  
41  
42  
43  
44  
45  
46  
47

|               |     |        |                                                                                                                            |  |             |  |  |                   |
|---------------|-----|--------|----------------------------------------------------------------------------------------------------------------------------|--|-------------|--|--|-------------------|
| 2016<br>N=101 | USA | cohort | neuroleptic<br>malignant<br>syndrome, QTc<br>prolongation,<br>extrapyramidal<br>symptoms,<br>hematological<br>disturbances |  | haloperidol |  |  | and severe<br>TBI |
|---------------|-----|--------|----------------------------------------------------------------------------------------------------------------------------|--|-------------|--|--|-------------------|

For peer review only

218 **Table 2 – Tools used to measure agitated behaviors**

| Tools                                                                              | Description                                                                                                                                                                                     |
|------------------------------------------------------------------------------------|-------------------------------------------------------------------------------------------------------------------------------------------------------------------------------------------------|
| Agitated behavior scale <sup>52</sup>                                              | Scale of 14 items with 4 levels of scoring to assess the nature and extent of agitation during the acute recovery of traumatic brain. Total scores greater than 21 are considered as agitation. |
| Brief Anger and Aggression Scale <sup>53</sup>                                     | A six-item measure developed for the rapid screening and identification of anger and aggression levels.                                                                                         |
| Confusion assessment protocol <sup>54</sup>                                        | Combination of orientation, cognition and other clinical measures of early confusion following traumatic brain injury.                                                                          |
| Functional independence measure (FIM) <sup>55</sup>                                | Functional assessment measure with a 18-item ordinal scale used in the rehabilitation population. It offers a useful assessment of patient progress during inpatient rehabilitation.            |
| Global improvement subscale of the Clinical Global Impressions (CGI) <sup>56</sup> | The CGI is a 3-item observer-rated scale that measures illness severity (CGIS), global improvement or change (CGIC) and therapeutic response.                                                   |
| Belligerence cluster score for the Katz adjustment scale (KAS) <sup>57</sup>       | The KAS is an observer rating scale used to assess the social adjustment of people with traumatic brain injury.                                                                                 |
| Neuropsychiatric inventory irritability                                            | The NPI is a 40-item scale evaluating 12 behavioral domains including irritability and                                                                                                          |

|                                                                  |                                                                                                                                                                                                                                                                                                                                                                                                                                                                                                                                                                 |
|------------------------------------------------------------------|-----------------------------------------------------------------------------------------------------------------------------------------------------------------------------------------------------------------------------------------------------------------------------------------------------------------------------------------------------------------------------------------------------------------------------------------------------------------------------------------------------------------------------------------------------------------|
| <p>(NPI-I) and aggression domains<br/>(NPI-A)<sup>51</sup></p>   | <p>aggression. The NPI irritability (NPI-I) items include bad temper, rapid mood changes, sudden anger, impatience, crankiness, and argumentative. Raters evaluate frequency and severity of behaviors in the last month. The NPI aggression domain assesses the tendency to get upset, resistance to activities, stubbornness, uncooperativeness, shouting, cursing, and physical behaviors indicative of aggression. The NPI score is the product of frequency and severity. The worst item score provided by the scorer is NPI-I or NPI-A most aberrant.</p> |
| <p>Neurobehavioral Function Inventory<br/>(NFI)<sup>58</sup></p> | <p>The NFI provides information on the frequency of behaviors and symptoms commonly associated with brain injury. Two versions of the NFI are available, one for completion by family members, another for completion by the person with the injury.</p>                                                                                                                                                                                                                                                                                                        |
| <p>Neurobehavioral rating scale<br/>(NRS)<sup>59</sup></p>       | <p>The NRS is a 28-item observer-rated instrument that measures a broad range of cognitive and noncognitive symptoms. It measures symptoms associated with psychiatric disorders as well as cognitive impairment and behavioral disturbances.</p>                                                                                                                                                                                                                                                                                                               |
| <p>Overt aggression scale (OAS)<sup>60</sup></p>                 | <p>Scale for the objective rating of verbal and physical aggression. The OAS measures aggressive behaviors divided into 4 categories: verbal aggression, physical aggression against objects, physical aggression against self, and physical aggression against others.</p>                                                                                                                                                                                                                                                                                     |

|                                                                                 |                                                                                                                                                                                                                                                                                                                                                               |
|---------------------------------------------------------------------------------|---------------------------------------------------------------------------------------------------------------------------------------------------------------------------------------------------------------------------------------------------------------------------------------------------------------------------------------------------------------|
| Anger-Hostility factor score of the Profile of Mood States (POMS) <sup>31</sup> | The POMS consists of 65 adjectives that describe moods or feelings, to which the patient responds on a 5-point scale that ranges from “Not at all” to “Extremely”. The POMS measures six identifiable mood/affective states: tension-anxiety, depression-dejection, anger-hostility, vigor-activity (V); fatigue-inertia (F), and confusion-bewilderment (C). |
| State-Trait Anger Scale (STAS) <sup>31</sup>                                    | The STAS is a 20-item self-report scale assessing two types of anger (State and Trait). State anger is comprised of tension, annoyance, irritability or rage. Whereas trait anger is the frequency with which a person feels state anger over time.                                                                                                           |

1  
2  
3 220 Of the identified studies, two were conference abstracts that remained unpublished.<sup>32, 36</sup>  
4  
5 221 The studies evaluated propranolol<sup>30</sup>, amantadine<sup>32-34</sup>, methylphenidate<sup>31</sup>, valproic acid<sup>36</sup>  
6  
7 222 and olanzapine<sup>37</sup> in comparison to placebo. Five used a randomized controlled parallel  
8  
9 223 design<sup>30, 32-34, 36</sup>, one used a randomized pretest posttest control group design<sup>31</sup>, one  
10  
11 224 was a prospective double blind observational study<sup>37</sup> and, one was a retrospective  
12  
13 225 observational study.<sup>35</sup> All the studies exclusively enrolled adult (16 years or older) TBI  
14  
15 226 patients and three studies excluded older patients (greater than 65 or 75 years)<sup>33, 34, 36</sup>.  
16  
17 227 The studies mostly included patients in rehabilitation (n=2)<sup>30, 32</sup> and outpatient (n=5)  
18  
19 228 settings.<sup>31, 33, 34, 36, 37</sup> Only one study evaluated patients in an intensive care unit (ICU)  
20  
21 229 setting.<sup>35</sup> All the studies exclusively studied TBI patients.<sup>30-37</sup> Three studies identified in  
22  
23 230 an earlier systematic review were excluded (Figure 1) because TBI patients represented  
24  
25 231 less than 50% of the sample.<sup>23, 61-63</sup>  
26  
27  
28  
29  
30  
31 232  
32  
33 233 In the eight studies, one randomized trial evaluated the use of propranolol for the  
34  
35 234 treatment of agitation in severe blunt TBI patients (Table 3).<sup>30</sup> It reported a reduction in  
36  
37 235 the intensity of agitation episodes and in the use of physical restraints but failed to show  
38  
39 236 a reduction in the frequency of agitation episodes.<sup>30</sup> Amantadine was evaluated for the  
40  
41 237 management of confusion in a randomized trial, irritability in two randomized trials, and  
42  
43 238 agitation in a retrospective observational study.<sup>32-35</sup> The studies reported inconsistent  
44  
45 239 results (Table 3). In one unpublished study in the setting of rehabilitation within 90 days  
46  
47 240 of TBI (n=79), amantadine had no effect on confusion.<sup>32</sup> In a pilot study of outpatients  
48  
49 241 who suffered a TBI more than six months ago, amantadine showed significant  
50  
51 242 reductions in irritability and aggression using the Neuropsychiatric Inventory scale  
52  
53 243 (NPI).<sup>34</sup> In a follow-up study of 168 outpatients who had suffered a TBI more than 6  
54  
55  
56  
57  
58  
59  
60

1  
2  
3 244 months ago, no difference in the incidence of irritability at 28 and 60 days using the NPI-  
4  
5 245 I from observers (family member, close friend, or employer) was reported.<sup>33</sup> Participants  
6  
7 246 self-rating at day-60 indicated improvement in irritability ( $p<0.04$ ) but the difference  
8  
9  
10 247 became non-significant when adjusted for multiple comparisons. The Global  
11  
12 248 improvement subscale of the Clinical Global Impressions (CGI), which evaluates general  
13  
14 249 emotional and behavioral function, improved more in the amantadine group than in the  
15  
16 250 placebo group at day 60 ( $p=0.0354$ ). A sub-analysis of patients with anger and  
17  
18 251 aggression (118 of the 168 patients) in the same study was also carried out and  
19  
20 252 reported a statistically significant reduction in participant's self-rated aggression at 60  
21  
22 253 days.<sup>64</sup> Finally, in a retrospective observational study ( $n=139$ ), patients exposed to  
23  
24 254 amantadine in the ICU reported more agitation episodes defined as a Richmond  
25  
26 255 Agitation Sedation Score of +2 or higher (38% vs 14%) in an unadjusted analysis.<sup>35</sup> The  
27  
28 256 use of amantadine was also associated with an increased median ICU length of stay  
29  
30 257 (4.5 vs 3 days;  $p=0.01$ ) when compared to non-exposed patients.  
31  
32  
33  
34  
35  
36

37 258  
38 259 The efficacy of olanzapine in the management of restlessness, irritability, aggression  
39  
40 260 and insomnia in outpatients with a history of TBI was evaluated in a prospective double  
41  
42 261 blind study.<sup>37</sup> While no reduction in restlessness was reported, the authors did report a  
43  
44 262 significant reduction in irritability and insomnia between weeks 1 and 3 in olanzapine-  
45  
46 263 treated patients. Unfortunately, no statistical comparison with the placebo group was  
47  
48 264 provided. The efficacy of valproic acid in reducing agitated behaviors among mild and  
49  
50 265 moderate TBI outpatients was evaluated in an unpublished randomized controlled study  
51  
52 266 ( $n=50$ ).<sup>36</sup> Patients were included more than one year following brain injury and suffered  
53  
54 267 from both affective lability and alcohol dependence. A significant reduction in the  
55  
56  
57  
58  
59  
60

268 **Table 3 – Efficacy and safety outcomes**

| Study/Year/n                                          | Intervention    | Agitated behavior measures                                                                                                                                   | Efficacy outcomes                                                                                                                                                                                                                  | Safety outcomes                                  |
|-------------------------------------------------------|-----------------|--------------------------------------------------------------------------------------------------------------------------------------------------------------|------------------------------------------------------------------------------------------------------------------------------------------------------------------------------------------------------------------------------------|--------------------------------------------------|
| <b>1. Agitated behavior as the presenting symptom</b> |                 |                                                                                                                                                              |                                                                                                                                                                                                                                    |                                                  |
| <i>Randomized controlled studies</i>                  |                 |                                                                                                                                                              |                                                                                                                                                                                                                                    |                                                  |
| Brooke <sup>30</sup><br>1992<br>N=21                  | Propranolol     | Overt aggression scale                                                                                                                                       | Significant reduction in maximum intensities of agitation per week (p<0.05). No significant difference in average number of agitation episodes per week. Significant reduction in physical restraint use during the study (p<0.05) | No safety outcomes reported                      |
| Mooney 1993 <sup>31</sup><br>N=38                     | Methylphenidate | State-Trait Anger Scale, Belligerence cluster score for the Katz adjustment scale and the Anger-Hostility factor score, Organic Signs and Symptoms Inventory | Significant difference in the comparison of methylphenidate and placebo group on all the anger measures before and after 6 weeks in a multivariate analysis p=0.02).                                                               | No significant effect on side effects            |
| Yablon 2010 <sup>32</sup><br>N=79                     | Amantadine      | Confusion assessment protocol                                                                                                                                | No significant differences in the number of symptoms of posttraumatic confusional state as measured by                                                                                                                             | No patients withdrawn because of safety criteria |

|                                      |               |                                                                                          |                                                                                                                                                                                                                                                                                                                                                                                                                    |                                                                                                                                  |
|--------------------------------------|---------------|------------------------------------------------------------------------------------------|--------------------------------------------------------------------------------------------------------------------------------------------------------------------------------------------------------------------------------------------------------------------------------------------------------------------------------------------------------------------------------------------------------------------|----------------------------------------------------------------------------------------------------------------------------------|
|                                      |               | (CAP)                                                                                    | the CAP at 14 days (amantadine 2.56 vs placebo 2.7; p=0.57). Mean difference in time to first “nonconfused” CAP score between groups approached significance (amantadine 7.7 days and placebo 9.3 days; p=0.053)                                                                                                                                                                                                   |                                                                                                                                  |
| Hammond 2014 <sup>34</sup><br>N=76   | Amantadine    | NPI-I most aberrant and most problematic Irritability (NPI-I) and aggressiveness (NPI-A) | Significant reduction in irritability (80.56% improved at least 3 points on the NPI-I, compared with 44.44% in the placebo group; p=0.0016). Mean change in NPI-I was -4.3 in the amantadine group and -2.6 in the placebo group (P = .0085). When excluding individuals with minimal to no baseline aggression, mean change in NPI-A was -4.56 in the amantadine group and -2.46 in the placebo group (P = .046). | No difference in adverse events (tremors, appetite, gastrointestinal, aches and pain, sexual problems, disorientation, seizures) |
| Beresford 2015 <sup>30</sup><br>N=50 | Valproic acid | Agitated Behavior Scale by spouse or significant other                                   | Significant others' weekly Agitated Behavior Scale ratings were statistically lower, indicating less agitation in the valproic acid group, 12.9 +/- 4.9, than in the placebo group, 15.5 +/- 6.6, with significance at p=0.0367.                                                                                                                                                                                   | No safety outcomes reported                                                                                                      |



1  
2  
3  
4  
5  
6  
7  
8  
9  
10  
11  
12  
13  
14  
15  
16  
17  
18  
19  
20  
21  
22  
23  
24  
25  
26  
27  
28  
29  
30  
31  
32  
33  
34  
35  
36  
37  
38  
39  
40  
41  
42  
43  
44  
45  
46  
47

|                                                                  |                   |                                                                                                                                               |                                                                                                                                                                                                                                                                                                                                                                       |                                                                                         |
|------------------------------------------------------------------|-------------------|-----------------------------------------------------------------------------------------------------------------------------------------------|-----------------------------------------------------------------------------------------------------------------------------------------------------------------------------------------------------------------------------------------------------------------------------------------------------------------------------------------------------------------------|-----------------------------------------------------------------------------------------|
| <p>Hammond 2015<sup>33</sup><br/><br/>N=168</p>                  | <p>Amantadine</p> | <p>NPI-I most problematic by observer and by patient. Global improvement subscale of the Clinical Global Impressions (CGI) by physicians.</p> | <p>Observer ratings were not different at day 28 or 60. Participants rating at day 60 showed improvement in NPI-I most problematic (<math>p &lt; 0.04</math>; but NS for when adjusted for multiple comparisons). Physician's assessment of global improvement improved more in the amantadine group than the placebo group at 60 days (<math>p = 0.0354</math>).</p> | <p>Well tolerated with no significant differences in adverse events between groups.</p> |
| <p><i>Observational studies</i></p>                              |                   |                                                                                                                                               |                                                                                                                                                                                                                                                                                                                                                                       |                                                                                         |
| <p>Maturana Waidele<sup>37</sup><br/><br/>2009<br/><br/>N=31</p> | <p>Olanzapine</p> | <p>Restlessness, irritability, aggressiveness and insomnia. No tool mentioned.</p>                                                            | <p>Reduction in irritability (<math>p &lt; 0.001</math>), aggressiveness (<math>p = 0.008</math>) and insomnia (<math>p = .0011</math>) between weeks 1 and 3 in the patients treated with olanzapine</p>                                                                                                                                                             | <p>No safety outcomes reported</p>                                                      |
| <p>Gramish 2017<sup>35</sup><br/><br/>N=139</p>                  | <p>Amantadine</p> | <p>RASS score of +2 or higher</p>                                                                                                             | <p>Increase in agitation in patients exposed to amantadine (38%) compared to non-exposed (14%); <math>p = 0.018</math>. Increase in median ICU length of stay (4.5</p>                                                                                                                                                                                                | <p>No safety outcomes reported</p>                                                      |

|                                                           |            |                                                                                              |                                                                                                                                                                |                                                                                    |
|-----------------------------------------------------------|------------|----------------------------------------------------------------------------------------------|----------------------------------------------------------------------------------------------------------------------------------------------------------------|------------------------------------------------------------------------------------|
|                                                           |            |                                                                                              | vs 3 days; p=0.01). Median hospital length of stay was non-significantly increased (14 days vs 10 days; p=0.051)                                               |                                                                                    |
| <b>2. Agitated behavior is not the presenting symptom</b> |            |                                                                                              |                                                                                                                                                                |                                                                                    |
| <i>Randomized controlled studies</i>                      |            |                                                                                              |                                                                                                                                                                |                                                                                    |
| Schneider 1999 <sup>41</sup><br>N=10                      | Amantadine | Neurobehavioral rating scale                                                                 | No significant difference in behavior scores between amantadine and placebo groups                                                                             | No safety outcomes reported                                                        |
| Meythaler 2001 <sup>40</sup><br>N=9                       | Sertraline | Agitated Behavior Scale                                                                      | No difference in decline of ABS over treatment period                                                                                                          | No safety outcomes reported                                                        |
| Meythaler 2002 <sup>42</sup><br>N=35                      | Amantadine | Agitated Behavior Scale                                                                      | There were no statistically significant changes or trends in the ABS during the first 6 weeks or the second 6 weeks of the study (P> .05, Mann–Whitney U test) | No detrimental effects in hematology or biochemistry laboratories and no seizures. |
| Banos 2010 <sup>38</sup><br>N=99                          | Sertraline | Aggression self-report and family report according to the Neurobehavioral Function Inventory | No significant differences between sertraline and placebo in patient self-report and family report.                                                            | No safety outcomes reported                                                        |
| Giacino 2012 <sup>39</sup><br>N=184                       | Amantadine | Agitation and restlessness not                                                               | A total of 12/87 (14%) patients and 11/97 (11%) patients exposed to amantadine and placebo                                                                     | No differences in adverse events (seizure, nausea, vomiting,                       |

|                                                             |                   |                                                                                 |                                                                                                                                                                |                                                                                                                                                       |
|-------------------------------------------------------------|-------------------|---------------------------------------------------------------------------------|----------------------------------------------------------------------------------------------------------------------------------------------------------------|-------------------------------------------------------------------------------------------------------------------------------------------------------|
|                                                             |                   | further defined                                                                 | developed agitation (p=NS) over the 4-week period. Restlessness was reported in 8% and 9% of patients exposed to amantadine and placebo, respectively.         | constipation, diarrhea, elevated liver function tests, insomnia, rash, congestive heart failure, involuntary muscle contractions)                     |
| Tramontana 2014<br>N=22 but 13 patients completed the study | Lisdexamphetamine | Agitation and restlessness not further defined                                  | No difference in agitation (no cases in each group) or irritability (1/13 case) during placebo) between the Lisdexamphetamine and placebo groups.              | Reduced appetite and weight loss of more than 5 lbs more frequent with lisdexamphetamine (7 vs 1 case) p=NS                                           |
| Johansson 2014<br>N=48                                      | Methylphenidate   | Aggression, restlessness and irritability not further defined                   | No difference in aggression, restlessness and irritability in patients treated with methylphenidate                                                            | A significant increase in heart rate was found. No significant changes were found in blood pressure or QT intervals.                                  |
| Fann 2017<br>N=62                                           | Sertraline        | Brief Anger and Aggression Scale and agitation/restlessness not further defined | No difference in the Anger and Aggression Scale. More patients developed agitation/restlessness in the sertraline group (17%) vs the placebo group (7%) p=0.42 | No significant difference in safety outcomes. More patients in the sertraline group (17%) developed gas/flatulence vs the placebo group (0%) p=0.052. |
| Hart 2017                                                   | Dextroamphetamine | Agitated Behavior                                                               | Increase in agitation with dextroamphetamine over                                                                                                              | No significant difference in heart                                                                                                                    |

|      |      |       |                                   |                         |
|------|------|-------|-----------------------------------|-------------------------|
| N=32 | mine | Scale | time compared to placebo (p<0.05) | rate or blood pressure. |
|------|------|-------|-----------------------------------|-------------------------|

For peer review only

1  
2  
3 270 agitated behavior scores (ABS) evaluated by family members at eight weeks (12.9 vs  
4  
5 271 15.5 points;  $p=0.03$ ) was observed. Finally, a crossover study assessed  
6  
7 272 methylphenidate for anger ( $n=38$ ) in TBI rehabilitation center outpatients (six months or  
8  
9  
10 273 more after TBI). After six weeks, methylphenidate significantly reduced the anger score  
11  
12 274 using the State Trait Anger Scale (STAS).<sup>31</sup>

13  
14 275  
15  
16  
17 276 Of the eight studies, safety outcomes were reported in four studies.<sup>31-34</sup> When reported,  
18  
19 277 the agents studied were well tolerated with no significant differences observed.  
20  
21 278 Functional and cognitive outcomes were not reported in any of these studies.

22  
23  
24 279  
25  
26 280 *Agitated behavior as a secondary measure*

27  
28 281  
29 282 We identified nine studies evaluating agitated behaviors as a secondary measure, which  
30  
31 283 were focused on cognitive function and neurological recovery (Table 1).<sup>38-46</sup> In these  
32  
33 284 studies, sertraline<sup>38, 40, 44</sup>, amantadine<sup>39, 41, 42</sup>, amphetamines<sup>43, 46</sup>, and methylphenidate<sup>45</sup>  
34  
35 285 were evaluated versus placebo and reported agitated behaviors as an outcome. Of  
36  
37 286 these studies, 6 used a randomized crossover design and 3 used a randomized  
38  
39 287 controlled parallel design.

40  
41 288  
42  
43  
44  
45 289 Sertraline was evaluated in three studies to enhance recovery and increase arousal,  
46  
47 290 ameliorate cognitive and neurobehavioral functioning and to treat major depression  
48  
49 291 (Table 3).<sup>38, 40, 44</sup> In all these three studies, sertraline had no effect on the incidence of  
50  
51 292 agitation, anger or aggression. In one study, more patients developed  
52  
53 293 agitation/restlessness in the sertraline group (17%) compared to the placebo group (7%)

1  
2  
3 294 but this difference was not statistically significant ( $p=0.42$ ).<sup>44</sup> Amantadine was also  
4  
5 295 evaluated in three studies for cognitive and functional recovery.<sup>39, 41, 42</sup> All three studies  
6  
7 296 found no differences in agitated behaviors compared to placebo. Methylphenidate was  
8  
9 297 evaluated for secondary mental fatigue in mild TBI patients more than six months after  
10  
11 298 injury.<sup>45</sup> However, it had no effect on irritability and aggression. Lisdexamphetamine and  
12  
13 299 dextroamphetamine were each evaluated for attention deficits in TBI patients and no  
14  
15 300 effect on agitated behaviors was noted with lisdexamphetamine whereas  
16  
17 301 dextroamphetamine increased agitation over time ( $p<0.05$ ).<sup>43, 46</sup> Among these 9 studies,  
18  
19 302 those evaluating sertraline and amantadine reported no significant differences in  
20  
21 303 adverse events.<sup>38-42, 44</sup>  
22  
23  
24  
25  
26  
27

28 304  
29 305 *Studies evaluating safety outcomes*  
30  
31 306 Finally, the safety of pharmacological agents used for agitated behaviors in TBI patients  
32  
33 307 was evaluated in four retrospective observational studies (Table 4).<sup>47-50</sup> Two of these  
34  
35 308 studies focused on the effect of haloperidol and antipsychotic use on post-traumatic  
36  
37 309 amnesia (PTA) duration, whereas a third evaluated the effects of antipsychotics,  
38  
39 310 benzodiazepines and narcotics on PTA duration, and Functional independence measure  
40  
41 311 (FIM) cognitive and motor scores.<sup>48-50</sup> In these three studies, haloperidol and other  
42  
43 312 antipsychotics were associated with an increase in PTA duration. Antipsychotics,  
44  
45 313 benzodiazepines and narcotics had no effects on FIM scores.<sup>48</sup> Finally a fourth study  
46  
47 314 focused on the general safety (seizures, neuroleptic malignant syndrome, QTc  
48  
49 315 prolongation, extrapyramidal symptoms, hematologic disturbances) of haloperidol in ICU  
50  
51 316 TBI patients.<sup>47</sup> Patients exposed to haloperidol ( $n=45$ ) had no significant increase in  
52  
53 317 adverse events compared to non-exposed patients ( $n=56$ ). Of note, none of the studies  
54  
55  
56  
57  
58  
59  
60

1  
2  
3 318 adjusted for severity of TBI and other potential confounders.  
4  
5  
6 319

7  
8 320 *Risk of bias assessment*

9  
10 321 Risk of bias scores are reported in Table 5. The analysis of risk of bias of randomized  
11  
12 322 controlled trials with the Cochrane Collaboration's Tool revealed that many studies did  
13  
14 323 not provide sufficient information on sequence, generation and allocation concealment.

15  
16  
17 324 A majority of studies had other threats to validity including limited sample sizes, no  
18  
19 325 description of patient demographics and loss to follow-up. For six studies evaluated with  
20  
21 326 the Newcastle-Ottawa tool, the number of stars awarded ranged from four to five. Most  
22  
23 327 studies were awarded a score of four stars, indicating a high risk of bias. As none of the  
24  
25 328 six studies were adjusted for potential confounding, all received 0 stars for comparability.  
26  
27

28 329

29  
30 330

31 331

32  
33 332

34  
35 333

36  
37 334

38  
39 335

40  
41 336  
42  
43  
44  
45  
46  
47  
48  
49  
50  
51  
52  
53  
54  
55  
56  
57  
58  
59  
60

337 **Table 4 - Studies assessing the safety of pharmacological agents used for agitated behaviors in TBI**

| Study/Year/n           | Drugs studied                                     | Results                                                                                                                                                                                                                                                                                                                                                                                                                                                                                                   |
|------------------------|---------------------------------------------------|-----------------------------------------------------------------------------------------------------------------------------------------------------------------------------------------------------------------------------------------------------------------------------------------------------------------------------------------------------------------------------------------------------------------------------------------------------------------------------------------------------------|
| Rao 1985<br>N=26       | Haloperidol                                       | Twenty-five patients exhibited agitation and 11 patients required haloperidol. In an unadjusted analysis, the haloperidol patients have a significantly longer period (8 vs 4 weeks; $p<0.03$ ) of post-traumatic amnesia (PTA).                                                                                                                                                                                                                                                                          |
| Mysiw<br>2006<br>N=182 | Narcotics,<br>benzodiazepines and<br>neuroleptics | Narcotics, benzodiazepines and neuroleptics had no effect on the Function Independence Measures (FIM) motor and independence scores. In an unadjusted analysis, narcotics and neuroleptics increased duration of PTA by more than 7 days ( $p<0.01$ ).                                                                                                                                                                                                                                                    |
| Kooda<br>2015<br>N=195 | Antipsychotics                                    | Fifty-two patients received antipsychotics (26.7%) within 7 days of TBI, mostly quetiapine. In an unadjusted analysis, duration of PTA was significantly longer (19.6 vs 12.3 days; $p=0.013$ ) in patients treated with antipsychotics.                                                                                                                                                                                                                                                                  |
| Anderson 2016<br>N=101 | Haloperidol                                       | In an unadjusted analysis, there was no significant increase in adverse events (QT prolongation, seizures, neuroleptic malignant syndrome, extrapyramidal symptoms, or hematologic disturbances) associated with haloperidol use. Patients in the haloperidol group who developed complications received a higher mean daily dose [ $p = 0.013$ ]. There was no difference in length of mechanical ventilation but the haloperidol group had a longer hospital length of stay (22 vs 11 days; $p<0.001$ ) |

338

339 **Table 5 – Risk of bias assessment**

340

|                                        |
|----------------------------------------|
| <b>1. Randomized controlled trials</b> |
|----------------------------------------|



1  
2  
3  
4  
5  
6  
7  
8  
9  
10  
11  
12  
13  
14  
15  
16  
17  
18  
19  
20  
21  
22  
23  
24  
25  
26  
27  
28  
29  
30  
31  
32  
33  
34  
35  
36  
37  
38  
39  
40  
41  
42  
43  
44  
45  
46  
47

| Cochrane Collaboration Tool Risk of bias items |                     |            |                                        |                                |              |                     |                           |
|------------------------------------------------|---------------------|------------|----------------------------------------|--------------------------------|--------------|---------------------|---------------------------|
| Study (year)                                   | Sequence generation | Allocation | Blinding of participants and personnel | Blinding of outcome assessment | Outcome data | Selective reporting | Other threats to validity |
| Brooke 1992                                    | U                   | U          | L                                      | L                              | L            | L                   | H                         |
| Mooney 1993                                    | U                   | U          | L                                      | H                              | L            | U                   | H                         |
| Schneider 1999                                 | U                   | U          | U                                      | U                              | H            | L                   | H                         |
| Meythaler 2001                                 | U                   | U          | L                                      | L                              | U            | U                   | H                         |
| Meythaler 2002                                 | U                   | U          | U                                      | U                              | L            | H                   | H                         |
| Banos 2010                                     | U                   | U          | L                                      | L                              | L            | L                   | H                         |
| Yablon 2010                                    | U                   | U          | L                                      | L                              | L            | U                   | H                         |
| Giacino 2012                                   | U                   | L          | L                                      | L                              | L            | L                   | L                         |

|                                 |                                           |   |                            |   |   |                      |   |
|---------------------------------|-------------------------------------------|---|----------------------------|---|---|----------------------|---|
| Hammond 2014                    | L                                         | L | L                          | L | U | L                    | L |
| Tramontana 2014                 | H                                         | H | L                          | L | H | L                    | H |
| Johansson 2014                  | U                                         | H | H                          | H | H | L                    | H |
| Beresford 2015                  | U                                         | U | L                          | L | H | L                    | H |
| Hammond 2015                    | L                                         | L | L                          | L | U | L                    | L |
| Fann 2017                       | L                                         | L | L                          | L | L | L                    | H |
| Hart 2017                       | U                                         | U | L                          | L | L | L                    | L |
| <b>2. Observational studies</b> |                                           |   |                            |   |   |                      |   |
| Study (year)                    | Newcastle-Ottawa Quality Assessment Scale |   |                            |   |   |                      |   |
|                                 | Number of stars awarded                   |   |                            |   |   |                      |   |
|                                 | Selection <sup>a</sup>                    |   | Comparability <sup>b</sup> |   |   | Outcome <sup>c</sup> |   |
| Rao 1985                        | **                                        |   |                            |   |   | **                   |   |

1  
2  
3  
4  
5  
6  
7  
8  
9  
10  
11  
12  
13  
14  
15  
16  
17  
18  
19  
20  
21  
22  
23  
24  
25  
26  
27  
28  
29  
30  
31  
32  
33  
34  
35  
36  
37  
38  
39  
40  
41  
42  
43  
44  
45  
46  
47

|                          |     |  |     |
|--------------------------|-----|--|-----|
| Maturana Waidele<br>2009 | **  |  | **  |
| Mysiw 2006               | **  |  | *** |
| Kooda 2015               | **  |  | **  |
| Anderson 2016            | **  |  | **  |
| Gramish 2017             | *** |  | *   |

341 For Cochrane Collaboration's Tool:

342 H, high risk of bias; L, low risk of bias; U, unclear risk of bias

343

344 For Newcastle-Ottawa Quality Assessment Scale :

345 <sup>a</sup> Maximum 4 stars

346 <sup>b</sup> Maximum 2 stars

347 <sup>c</sup> Maximum 3 stars.

348 N/A : not applicable

For peer review only

## 349 Discussion

350 In this systematic review, we used an exhaustive search strategy and included studies  
351 directly or indirectly evaluating pharmacological agents for the management of TBI-  
352 associated agitated behaviors as well as studies assessing the safety of  
353 pharmacological agents used for these agitated behaviors. Despite the prevalence and  
354 importance of this problem, we found a limited number of studies evaluating  
355 pharmacological interventions for the management of agitated behaviors. Propranolol,  
356 methylphenidate, valproic acid and olanzapine were the only agents suggesting a  
357 potential benefit in reducing agitation, anger or irritability.<sup>30, 31, 36, 37</sup> However, the studies  
358 evaluating these agents had limited sample sizes, heterogeneous patient populations  
359 and an unclear risk of bias. Amantadine showed mixed results whereas sertraline,  
360 lysdexamphetamine and dextroamphetamine showed no benefits.

361  
362 The use of beta-blockers in patients with organic brain disease and assaultive behaviors  
363 or impulsivity has been previously studied in three crossover-randomized trials with  
364 some efficacy but TBI represented less than 50% of the total patient population.<sup>61-63</sup> In  
365 the study presented in this review, propranolol reduced the intensity of agitation but not  
366 the frequency.<sup>30</sup> One important finding was a reduction in the use of physical restraints.  
367 Unfortunately, safety measures such as hypotension and bradycardia were not reported.  
368 The Canadian ABIKUS guidelines have recommended beta-blockers for the treatment of  
369 aggression following TBI.<sup>65</sup>

370 Although numerous observational studies have reported a reduction in agitation with the  
371 use of antipsychotic agents, we found no controlled studies evaluating the efficacy of  
372 antipsychotics other than olanzapine.<sup>66-68</sup> In a previous systematic review that included

1  
2  
3 373 case reports and case series evaluating antipsychotics, Lanthier et al. identified 7  
4  
5 374 articles that included a total of 52 patients.<sup>24</sup> The lack of a control group excluded these  
6  
7  
8 375 studies from our review. The only study we included that used olanzapine didn't report a  
9  
10 376 reduction in restlessness but did suggest a reduction in irritability.<sup>37</sup> Its interpretation is  
11  
12 377 greatly limited given the poor description of methods and a lack of statistical comparison  
13  
14 378 with the placebo group. The four studies assessing safety all evaluated antipsychotic  
15  
16 379 agents and suggested a potential risk of prolonged PTA in unadjusted analyses.<sup>47-50</sup>  
17  
18  
19 380 None of the studies controlled for potential confounders such as severity of TBI.  
20  
21 381 Although pre-clinical studies have suggested a reduction in cognitive and motor recovery  
22  
23 382 with repeated administration of haloperidol and risperidone, the one study evaluating  
24  
25 383 cognitive and motor scores reported no significant association with antipsychotic use.<sup>19-</sup>  
26  
27 384 <sup>21, 48, 69</sup> In light of these results, both the International Cognitive (INCOG), the Canadian  
28  
29 385 ABIKUS guidelines and the French Society of Physical and Rehabilitation Medicine  
30  
31 386 (SOFMER) guidelines have advised against the use of antipsychotics in TBI patients  
32  
33 387 with agitated behaviors.<sup>24, 65, 70</sup> Paradoxically, observational studies have suggested  
34  
35 388 antipsychotics are frequently used for the management of agitated behaviors.<sup>14, 71-73</sup>  
36  
37  
38  
39  
40 389  
41  
42 390 Anticonvulsants are clinically used as mood stabilizers in bipolar affective disorder and  
43  
44 391 have also been used in TBI-associated agitation.<sup>74, 75</sup> Case series have reported a  
45  
46 392 reduction in agitation and aggressive behaviors with the use of valproic acid and  
47  
48 393 carbamazepine but were uncontrolled.<sup>76-80</sup> We identified one unpublished study of TBI  
49  
50 394 patients with affective lability and alcohol dependence where valproic acid showed  
51  
52 395 effectiveness in reducing weekly ABS rated by spouse or significant other's.  
53  
54 396 Unfortunately, the abstract provided no information on the onset of effect or adverse  
55  
56  
57  
58  
59  
60

1  
2  
3 397 events associated with its use.  
4

5 398  
6  
7 399 Amantadine increases dopaminergic neurotransmission and has been shown to  
8  
9  
10 400 increase the rate of neurological recovery in severe TBI.<sup>39</sup> In the 4 studies that evaluated  
11  
12 401 amantadine for irritability, agitation or aggressiveness, results were variable.<sup>32-35</sup>  
13  
14 402 Although one study suggested a reduction in irritability, a larger study by the same group  
15  
16 403 failed to confirm these results. Interestingly, a recent observational study of patients  
17  
18 404 exposed to amantadine in the ICU reported an increased risk of agitation.<sup>35</sup> However,  
19  
20 405 these results were uncontrolled and confounding may explain these differences. In  
21  
22 406 addition, the use of amantadine may have increased arousal and the agitation measured  
23  
24 407 may be part of the natural recovery. In studies in which agitation was not the presenting  
25  
26 408 symptom, no significant differences in behavior scores between amantadine and control  
27  
28 409 groups were reported.<sup>39, 41, 42</sup>  
29  
30

31  
32 410  
33  
34  
35 411 In this review, we found no comparative studies assessing the efficacy of tricyclic  
36  
37 412 antidepressants, dexmedetomidine or benzodiazepines. We also found no studies in  
38  
39 413 children. A search of TBI-associated agitation studies in clinical trial registries revealed  
40  
41 414 ongoing studies with the combination of dextromethorphan and quinidine  
42  
43 415 (ClinicalTrials.gov: NCT03095066) as well as propranolol and clonidine  
44  
45 416 (ClinicalTrials.gov: NCT01322048).<sup>81</sup> Finally, in a recent observational study on the  
46  
47 417 predictors of agitation in TBI rehabilitation, sodium channel antagonist anticonvulsants,  
48  
49 418 second-generation antipsychotics, and gamma-aminobutyric acid anxiolytics were  
50  
51 419 associated with more severe agitation.<sup>14</sup> Although indication bias and residual  
52  
53 420 confounding are probable, these results do suggest an association between suppression  
54  
55  
56  
57  
58  
59

1  
2  
3 421 of cognition and more agitation.  
4

5 422  
6  
7 423 Strengths of this study include an exhaustive search of the literature in the adult and  
8  
9  
10 424 pediatric populations, including grey literature and no language limitation. A risk of bias  
11  
12 425 assessment was performed for each included study. Limits of this study include the  
13  
14 426 presence of significant heterogeneity, variations in the different agitated behaviors  
15  
16 427 (agitation, irritability, and aggression) and populations (acute TBI, rehabilitation,  
17  
18 428 outpatient) evaluated, preventing the authors from proceeding to a meta-analysis. In  
19  
20 429 addition, very little studies reported length of stay and functional outcomes.  
21  
22  
23

24 430  
25  
26 431 **Conclusion**  
27  
28 432 In conclusion, there are insufficient data to recommend the use of any medications for  
29  
30 433 the management of agitation following TBI. More studies on tailored interventions and  
31  
32 434 continuous evaluation throughout the acute, rehabilitation and outpatient settings are  
33  
34 435 needed to assess the efficacy and safety of pharmacological agents in both the adult  
35  
36 436 and pediatric TBI populations. In addition, there is a need to better define and  
37  
38 437 standardize the assessment of agitated behaviors. Propranolol, methylphenidate,  
39  
40 438 valproic acid and olanzapine may offer some benefit, however, they need to be further  
41  
42 439 studied. Newer agents such as dexmedetomidine should also be evaluated.  
43  
44  
45  
46

47 440  
48  
49 441 **Acknowledgements**  
50  
51 442 We thank M. Patrice Dupont, librarian at the Université de Montréal for his  
52  
53 443 expertise and help with the literature search strategies.  
54  
55

56 444  
57  
58  
59  
60

1  
2  
3 445  
4  
5 446  
6  
7  
8 447  
9  
10 448  
11  
12 449  
13  
14 450  
15  
16  
17 451  
18  
19 452  
20  
21 453  
22  
23  
24 454  
25  
26 455

## References

1. Rubiano AM, Carney N, Chesnut R, Puyana JC. Global neurotrauma research challenges and opportunities. *Nature* 2015;527:S193-197.
2. Corrigan JD, Selassie AW, Orman JA. The epidemiology of traumatic brain injury. *J Head Trauma Rehabil* 2010;25:72-80.
3. Chen A, Bushmeneva K, Zagorski B, Colantonio A, Parsons D, Wodchis WP. Direct cost associated with acquired brain injury in Ontario. *BMC neurology* 2012;12:76.
4. Tuominen R, Joelsson P, Tenovuo O. Treatment costs and productivity losses caused by traumatic brain injuries. *Brain Inj* 2012;26:1697-1701.
5. Ciurli P, Formisano R, Bivona U, Cantagallo A, Angelelli P. Neuropsychiatric disorders in persons with severe traumatic brain injury: prevalence, phenomenology, and relationship with demographic, clinical, and functional features. *J Head Trauma Rehabil* 2011;26:116-126.
6. van der Naalt J, van Zomeren AH, Sluiter WJ, Minderhoud JM. Acute behavioural disturbances related to imaging studies and outcome in mild-to-moderate head injury. *Brain Inj* 2000;14:781-788.
7. Sandel ME, Mysiw WJ. The agitated brain injured patient. Part 1: Definitions, differential diagnosis, and assessment. *Archives of physical medicine and rehabilitation* 1996;77:617-623.
8. Kadyan V, Mysiw WJ, Bogner JA, Corrigan JD, Fugate LP, Clinchot DM. Gender differences in agitation after traumatic brain injury. *American journal of physical medicine & rehabilitation / Association of Academic Physiatrists* 2004;83:747-752.
9. Weir N, Doig EJ, Fleming JM, Wiemers A, Zemljic C. Objective and behavioural assessment of the emergence from post-traumatic amnesia (PTA). *Brain Inj* 2006;20:927-935.



10. Singh R, Venkateshwara G, Nair KP, Khan M, Saad R. Agitation after traumatic brain injury and predictors of outcome. *Brain Inj* 2014;28:336-340.
11. Nott MT, Chapparo C, Baguley IJ. Agitation following traumatic brain injury: an Australian sample. *Brain Inj* 2006;20:1175-1182.
12. Bogner JA, Corrigan JD, Fugate L, Mysiw WJ, Clinchot D. Role of agitation in prediction of outcomes after traumatic brain injury. *American journal of physical medicine & rehabilitation / Association of Academic Physiatrists* 2001;80:636-644.
13. Wolffbrandt MM, Poulsen I, Engberg AW, Hornnes N. Occurrence and severity of agitated behavior after severe traumatic brain injury. *Rehabil Nurs* 2013;38:133-141.
14. Bogner J, Barrett RS, Hammond FM, et al. Predictors of Agitated Behavior During Inpatient Rehabilitation for Traumatic Brain Injury. *Archives of physical medicine and rehabilitation* 2015;96:S274-S281 e274.
15. McNett M, Sarver W, Wilczewski P. The prevalence, treatment and outcomes of agitation among patients with brain injury admitted to acute care units. *Brain Inj* 2012;26:1155-1162.
16. Brooke MM, Questad KA, Patterson DR, Bashak KJ. Agitation and restlessness after closed head injury: a prospective study of 100 consecutive admissions. *Archives of physical medicine and rehabilitation* 1992;73:320-323.
17. Hammond FM, Barrett RS, Shea T, et al. Psychotropic Medication Use During Inpatient Rehabilitation for Traumatic Brain Injury. *Archives of physical medicine and rehabilitation* 2015;96:S256-S273 e214.
18. Williamson DR, Frenette AJ, Burry L, et al. Pharmacological interventions for agitation in patients with traumatic brain injury. *Crit Care* 2018;22(Suppl 1):P376.
19. Hoffman AN, Cheng JP, Zafonte RD, Kline AE. Administration of haloperidol and risperidone after neurobehavioral testing hinders the recovery of traumatic brain injury-induced deficits. *Life sciences* 2008;83:602-607.
20. Kline AE, Hoffman AN, Cheng JP, Zafonte RD, Massucci JL. Chronic administration of antipsychotics impede behavioral recovery after experimental traumatic brain injury. *Neuroscience letters* 2008;448:263-267.
21. Kline AE, Massucci JL, Zafonte RD, Dixon CE, DeFeo JR, Rogers EH. Differential effects of single versus multiple administrations of haloperidol and risperidone on functional outcome after experimental brain trauma. *Crit Care Med* 2007;35:919-924.
22. Phelps TI, Bondi CO, Ahmed RH, Olugbade YT, Kline AE. Divergent long-term consequences of chronic treatment with haloperidol, risperidone, and bromocriptine on traumatic brain injury-induced cognitive deficits. *Journal of neurotrauma* 2015;32:590-597.
23. Fleminger S, Greenwood RJ, Oliver DL. Pharmacological management for agitation and aggression in people with acquired brain injury. *The Cochrane database of systematic reviews* 2006:CD003299.
24. Plantier D, Luauté J, group S. Drugs for behavior disorders after traumatic brain injury: Systematic review and expert consensus leading to French recommendations for good practice. *Ann Phys Rehabil Med* 2016;59:42-57.
25. Mehta S, McIntyre A, Janzen S, Iruthayarajah J, Bateman A, Teasell R. Pharmacological management of agitation among individuals with moderate to severe acquired brain injury: A systematic review. *Brain Inj* 2018;32:287-296.

- 1  
2  
3 524 26. Williamson DR, Frenette AJ, Burry L, et al. Pharmacological interventions for  
4 525 agitation in patients with traumatic brain injury: protocol for a systematic review and meta-  
5 526 analysis. *Syst Rev* 2016;5:193.
- 6 527 27. McGowan J, Sampson M, Salzwedel DM, Cogo E, Foerster V, Lefebvre C. PRESS Peer  
7 528 Review of Electronic Search Strategies: 2015 Guideline Statement. *Journal of clinical*  
8 529 *epidemiology* 2016;75:40-46.
- 9 530 28. Higgins JP, Altman DG, Gotzsche PC, et al. The Cochrane Collaboration's tool for  
10 531 assessing risk of bias in randomised trials. *Bmj* 2011;343:d5928.
- 11 532 29. Wells G, Shea B, O'Connell D, et al. The Newcastle-Ottawa Scale (NOS) for assessing  
12 533 the quality of nonrandomised studies in meta-analyses.  
13 534 [http://www.ohri.ca/programs/clinical\\_epidemiology/oxford.asp](http://www.ohri.ca/programs/clinical_epidemiology/oxford.asp). 2013.
- 14 535 30. Brooke MM, Patterson DR, Questad KA, Cardenas D, Farrel-Roberts L. The treatment  
15 536 of agitation during initial hospitalization after traumatic brain injury. *Archives of physical*  
16 537 *medicine and rehabilitation* 1992;73:917-921.
- 17 538 31. Mooney GF, Haas LJ. Effect of methylphenidate on brain injury-related anger.  
18 539 *Archives of physical medicine and rehabilitation* 1993;74:153-160.
- 19 540 32. Yablon S, Sherer M, Nakase-Richardson R, N T. Amantadine Hydrochloride for  
20 541 Treatment of Symptoms of the  
21 542 Posttraumatic Confusional State: A Randomized, Double-Blind,  
22 543 Placebo-Controlled Trial. *Archives of physical medicine and rehabilitation* 2010;91:E3.
- 23 544 33. Hammond FM, Sherer M, Malec JF, et al. Amantadine Effect on Perceptions of  
24 545 Irritability after Traumatic Brain Injury: Results of the Amantadine Irritability Multisite  
25 546 Study. *Journal of neurotrauma* 2015;32:1230-1238.
- 26 547 34. Hammond FM, Bickett AK, Norton JH, Pershad R. Effectiveness of amantadine  
27 548 hydrochloride in the reduction of chronic traumatic brain injury irritability and aggression.  
28 549 *J Head Trauma Rehabil* 2014;29:391-399.
- 29 550 35. Gramish JA, Kopp BJ, Patanwala AE. Effect of Amantadine on Agitation in Critically Ill  
30 551 Patients With Traumatic Brain Injury. *Clin Neuropharmacol* 2017;40:212-216.
- 31 552 36. Beresford T, Schmidt BK, Buchanan J, et al. A double-blind trial of divalproex sodium  
32 553 for affective lability and ethanol use following traumatic brain injurt. *APA abstracts* 2015.
- 33 554 37. Maturana Waidele R, Maturana Rodillo R. Control de la agresividad con olanzapina  
34 555 en pacientes post tec / Aggressiveness control using olanzapine in post tbi patients *Cienc*  
35 556 *Trab* 2009;31:22-24.
- 36 557 38. Banos JH, Novack TA, Brunner R, Renfroe S, Lin HY, Meythaler J. Impact of early  
37 558 administration of sertraline on cognitive and behavioral recovery in the first year after  
38 559 moderate to severe traumatic brain injury. *J Head Trauma Rehabil* 2010;25:357-361.
- 39 560 39. Giacino JT, Whyte J, Bagiella E, et al. Placebo-controlled trial of amantadine for  
40 561 severe traumatic brain injury. *N Engl J Med* 2012;366:819-826.
- 41 562 40. Meythaler JM, Depalma L, Devivo MJ, Guin-Renfroe S, Novack TA. Sertraline to  
42 563 improve arousal and alertness in severe traumatic brain injury secondary to motor vehicle  
43 564 crashes. *Brain Inj* 2001;15:321-331.
- 44 565 41. Schneider WN, Drew-Cates J, Wong TM, Dombovy ML. Cognitive and behavioural  
45 566 efficacy of amantadine in acute traumatic brain injury: an initial double-blind placebo-  
46 567 controlled study. *Brain Inj* 1999;13:863-872.

- 1  
2  
3 568 42. Meythaler JM, Brunner RC, Johnson A, Novack TA. Amantadine to improve  
4 569 neurorecovery in traumatic brain injury-associated diffuse axonal injury: a pilot double-  
5 570 blind randomized trial. *J Head Trauma Rehabil* 2002;17:300-313.
- 6 571 43. Tramontana MG, Cowan RL, Zald D, Prokop JW, Guillaumondegui O. Traumatic brain  
7 572 injury-related attention deficits: treatment outcomes with lisdexamfetamine dimesylate  
8 573 (Vyvanse). *Brain Inj* 2014;28:1461-1472.
- 9 574 44. Fann JR, Bombardier CH, Temkin N, et al. Sertraline for Major Depression During the  
10 575 Year Following Traumatic Brain Injury: A Randomized Controlled Trial. *J Head Trauma*  
11 576 *Rehabil* 2017;32:332-342.
- 12 577 45. Johansson B, Wentzel AP, Andrell P, Odenstedt J, Mannheimer C, Ronnback L.  
13 578 Evaluation of dosage, safety and effects of methylphenidate on post-traumatic brain injury  
14 579 symptoms with a focus on mental fatigue and pain. *Brain Inj* 2014;28:304-310.
- 15 580 46. Hart T, Whyte J, Watanabe T, Chervoneva I. Effects of dextroamphetamine in  
16 581 subacute traumatic brain injury: A randomized, placebo-controlled pilot study. *Journal of*  
17 582 *neuroscience research* 2017.
- 18 583 47. Anderson RL, Birrer KL, Liu-De Ryke X. Haloperidol Use in Acute Traumatic  
19 584 Brain Injury: A Safety Analysis. *Journal of Intensive and Critical Care* 2016;2:1-6.
- 20 585 48. Mysiw WJ, Bogner JA, Corrigan JD, Fugate LP, Clinchot DM, Kadyan V. The impact of  
21 586 acute care medications on rehabilitation outcome after traumatic brain injury. *Brain Inj*  
22 587 2006;20:905-911.
- 23 588 49. Rao N, Jellinek HM, Woolston DC. Agitation in closed head injury: haloperidol effects  
24 589 on rehabilitation outcome. *Archives of physical medicine and rehabilitation* 1985;66:30-34.
- 25 590 50. Kooda K, Aho J, Weber D, Berown A. The effect of antipsychotic use post-traumatic  
26 591 brain injury on duration of post-traumatic amnesia. *Crit Care Med* 2015;43:289.
- 27 592 51. Cummings JL, Mega M, Gray K, Rosenberg-Thompson S, Carusi DA, Gornbein J. The  
28 593 Neuropsychiatric Inventory: comprehensive assessment of psychopathology in dementia.  
29 594 *Neurology* 1994;44:2308-2314.
- 30 595 52. Corrigan JD. Development of a scale for assessment of agitation following traumatic  
31 596 brain injury. *J Clin Exp Neuropsychol* 1989;11:261-277.
- 32 597 53. Maiuro R, Vitaliano P, Cahn T. A brief measure for the assessment of anger and  
33 598 aggression. *J Interpersonal Violence* 1987;2:166-178.
- 34 599 54. Sherer M, Nakase-Thompson R, Yablon SA, Gontkovsky ST. Multidimensional  
35 600 assessment of acute confusion after traumatic brain injury. *Archives of physical medicine*  
36 601 *and rehabilitation* 2005;86:896-904.
- 37 602 55. Keith RA, Granger CV, Hamilton BB, Sherwin FS. The functional independence  
38 603 measure: a new tool for rehabilitation. *Adv Clin Rehabil* 1987;1:6-18.
- 39 604 56. Busner J, Targum SD. The clinical global impressions scale: applying a research tool  
40 605 in clinical practice. *Psychiatry (Edgmont)* 2007;4:28-37.
- 41 606 57. Katz M, Lyerly S. Methods of measuring adjustment and social behavior in the  
42 607 community: I. Rationale, description, discrimination validity and scale development. *J*  
43 608 *Psychol Rep* 1963;13:503-535.
- 44 609 58. Kreutzer J, Seel R, Marwitz J. *The Neurobehavioral Functioning*  
45 610 *Inventory*. : The Psychological Corporation. San Antonio, TX., 1999.
- 46 611 59. Levin HS, High WM, Goethe KE, et al. The neurobehavioural rating scale: assessment  
47 612 of the behavioural sequelae of head injury by the clinician. *J Neurol Neurosurg Psychiatry*  
48 613 1987;50:183-193.

- 1  
2  
3 614 60. Yudofsky SC, Silver JM, Jackson W, Endicott J, Williams D. The Overt Aggression Scale  
4 615 for the objective rating of verbal and physical aggression. *Am J Psychiatry* 1986;143:35-39.  
5 616 61. Greendyke RM, Berkner JP, Webster JC, Gulya A. Treatment of behavioral problems  
6 617 with pindolol. *Psychosomatics* 1989;30:161-165.  
7 618 62. Greendyke RM, Kanter DR. Therapeutic effects of pindolol on behavioral  
8 619 disturbances associated with organic brain disease: a double-blind study. *J Clin Psychiatry*  
9 620 1986;47:423-426.  
10 621 63. Greendyke RM, Kanter DR, Schuster DB, Verstreat S, Wootton J. Propranolol  
11 622 treatment of assaultive patients with organic brain disease. A double-blind crossover,  
12 623 placebo-controlled study. *The Journal of nervous and mental disease* 1986;174:290-294.  
13 624 64. Hammond FM, Malec JF, Zafonte RD, et al. Potential Impact of Amantadine on  
14 625 Aggression in Chronic Traumatic Brain Injury. *J Head Trauma Rehabil* 2017;32:308-318.  
15 626 65. Acquired Brain Injury Knowledge Uptake Strategy (ABIKUS) guideline development  
16 627 group. Evidence based recommendations for rehabilitation of moderate to severe acquired  
17 628 brain injury. 2007. [http://www.abiebr.com/pdf/abikus\\_aug\\_07.pdf](http://www.abiebr.com/pdf/abikus_aug_07.pdf) [online].  
18 629 66. Kim E, Bijlani M. A pilot study of quetiapine treatment of aggression due to traumatic  
19 630 brain injury. *The Journal of neuropsychiatry and clinical neurosciences* 2006;18:547-549.  
20 631 67. Maryniak O, Manchanda R, Velani A. Methotrimeprazine in the treatment of agitation  
21 632 in acquired brain injury patients. *Brain Inj* 2001;15:167-174.  
22 633 68. Stanislav SW, Childs A. Evaluating the usage of droperidol in acutely agitated persons  
23 634 with brain injury. *Brain Inj* 2000;14:261-265.  
24 635 69. Wilson MS, Gibson CJ, Hamm RJ. Haloperidol, but not olanzapine, impairs cognitive  
25 636 performance after traumatic brain injury in rats. *American journal of physical medicine &*  
26 637 *rehabilitation / Association of Academic Physiatrists* 2003;82:871-879.  
27 638 70. Ponsford J, Janzen S, McIntyre A, et al. INCOG recommendations for management of  
28 639 cognition following traumatic brain injury, part I: posttraumatic amnesia/delirium. *J Head*  
29 640 *Trauma Rehabil* 2014;29:307-320.  
30 641 71. Pisa FE, Cosano G, Giangreco M, et al. Prescribing practice and off-label use of  
31 642 psychotropic medications in post-acute brain injury rehabilitation centres: a cross-sectional  
32 643 survey. *Brain Inj* 2015;29:508-516.  
33 644 72. Fugate LP, Spacek LA, Kresty LA, Levy CE, Johnson JC, Mysiw WJ. Measurement and  
34 645 treatment of agitation following traumatic brain injury: II. A survey of the Brain Injury  
35 646 Special Interest Group of the American Academy of Physical Medicine and Rehabilitation.  
36 647 *Archives of physical medicine and rehabilitation* 1997;78:924-928.  
37 648 73. Perreault M, Talic J, Frenette A, Burry L, Bernard F, Williamson D. Agitation after  
38 649 mild to moderate traumatic brain injury in the intensive care unit. *Crit Care* 2017;21 (Suppl  
39 650 1):P219.  
40 651 74. Chew E, Zafonte RD. Pharmacological management of neurobehavioral disorders  
41 652 following traumatic brain injury--a state-of-the-art review. *Journal of rehabilitation*  
42 653 *research and development* 2009;46:851-879.  
43 654 75. Deb S, Crownshaw T. The role of pharmacotherapy in the management of behaviour  
44 655 disorders in traumatic brain injury patients. *Brain Inj* 2004;18:1-31.  
45 656 76. Azouvi P, Jokic C, Attal N, Denys P, Markabi S, Bussel B. Carbamazepine in agitation  
46 657 and aggressive behaviour following severe closed-head injury: results of an open trial. *Brain*  
47 658 *Inj* 1999;13:797-804.

- 1  
2  
3 659 77. Chatham Showalter PE, Kimmel DN. Agitated symptom response to divalproex  
4 660 following acute brain injury. The Journal of neuropsychiatry and clinical neurosciences  
5 661 2000;12:395-397.
- 6 662 78. Chatham-Showalter PE. Carbamazepine for combativeness in acute traumatic brain  
7 663 injury. The Journal of neuropsychiatry and clinical neurosciences 1996;8:96-99.
- 8 664 79. Wroblewski BA, Joseph AB, Kupfer J, Kalliel K. Effectiveness of valproic acid on  
9 665 destructive and aggressive behaviours in patients with acquired brain injury. Brain Inj  
10 666 1997;11:37-47.
- 11 667 80. Kim E, Humaran TJ. Divalproex in the management of neuropsychiatric  
12 668 complications of remote acquired brain injury. The Journal of neuropsychiatry and clinical  
13 669 neurosciences 2002;14:202-205.
- 14 670 81. Patel MB, McKenna JW, Alvarez JM, et al. Decreasing adrenergic or sympathetic  
15 671 hyperactivity after severe traumatic brain injury using propranolol and clonidine (DASH  
16 672 After TBI Study): study protocol for a randomized controlled trial. Trials 2012;13:177.  
17  
18  
19  
20 673  
21  
22 674  
23  
24 675  
25  
26 676  
27  
28 677  
29  
30 678  
31  
32 679  
33  
34 680  
35  
36 681  
37  
38 682  
39  
40 683  
41  
42 684  
43  
44 685  
45  
46 686  
47  
48 687  
49  
50  
51  
52  
53  
54  
55  
56  
57  
58  
59  
60



1  
2  
3  
4  
5  
6  
7  
8  
9  
10  
11  
12  
13  
14  
15  
16  
17  
18  
19  
20  
21  
22  
23  
24  
25  
26  
27  
28  
29  
30  
31  
32  
33  
34  
35  
36  
37  
38  
39  
40  
41  
42  
43  
44  
45  
46  
47  
48  
49  
50  
51  
52  
53  
54  
55  
56  
57  
58  
59  
60

1 **PRISMA Flow Diagram**

2  
3

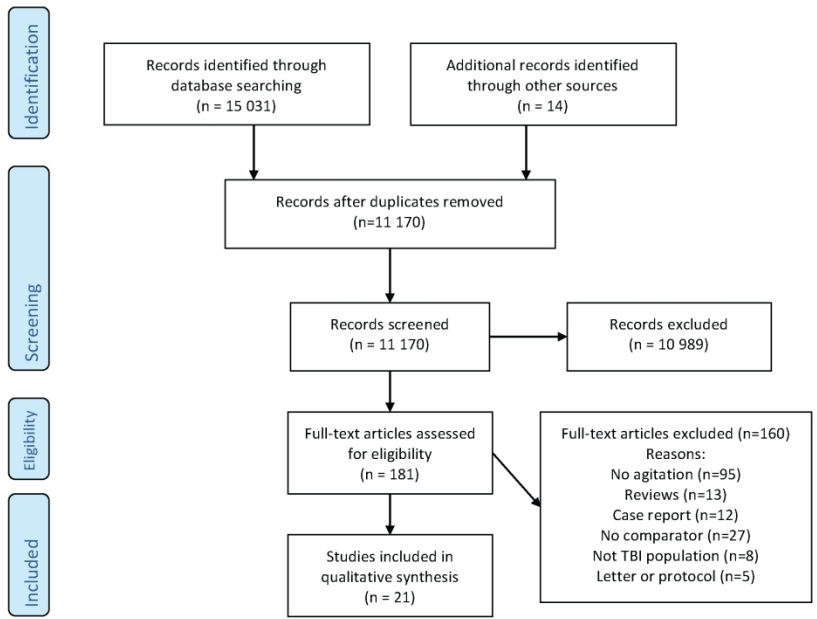

1

215x279mm (300 x 300 DPI)

# BMJ Open

## Pharmacological interventions for agitated behaviors in patients with traumatic brain injury: a systematic review

|                                 |                                                                                                                                                                                                                                                                                                                                                                                                                                                                                                                                                                                                                                                                                                                                                                                                                                                                                                                                                                                  |
|---------------------------------|----------------------------------------------------------------------------------------------------------------------------------------------------------------------------------------------------------------------------------------------------------------------------------------------------------------------------------------------------------------------------------------------------------------------------------------------------------------------------------------------------------------------------------------------------------------------------------------------------------------------------------------------------------------------------------------------------------------------------------------------------------------------------------------------------------------------------------------------------------------------------------------------------------------------------------------------------------------------------------|
| Journal:                        | <i>BMJ Open</i>                                                                                                                                                                                                                                                                                                                                                                                                                                                                                                                                                                                                                                                                                                                                                                                                                                                                                                                                                                  |
| Manuscript ID                   | bmjopen-2019-029604.R1                                                                                                                                                                                                                                                                                                                                                                                                                                                                                                                                                                                                                                                                                                                                                                                                                                                                                                                                                           |
| Article Type:                   | Research                                                                                                                                                                                                                                                                                                                                                                                                                                                                                                                                                                                                                                                                                                                                                                                                                                                                                                                                                                         |
| Date Submitted by the Author:   | 21-May-2019                                                                                                                                                                                                                                                                                                                                                                                                                                                                                                                                                                                                                                                                                                                                                                                                                                                                                                                                                                      |
| Complete List of Authors:       | Williamson, David ; Université de Montréal, Pharmacy; Hôpital du Sacré-Coeur de Montréal, Pharmacy<br>Frenette, Anne-Julie; Université de Montréal, Pharmacy; Hôpital du Sacré-Coeur de Montréal, Pharmacy<br>Burry, Lisa; Mount Sinai Hospital Pharmacy Department; University of Toronto Leslie Dan Faculty of Pharmacy<br>Perreault, Marc; Université de Montréal, Pharmacy; McGill University Health Centre, Pharmacy<br>Charbonney, Emmanuel; Université de Montréal Faculté de médecine<br>Lamontagne, François; Université de Sherbrooke, Médecine<br>Potvin, Marie-Julie; Hôpital du Sacré-Coeur de Montréal, Psychologie<br>Giguère, Jean-François; Hôpital du Sacré-Coeur de Montréal, Neurosurgery; Université de Montréal, Médecine<br>Mehta, Sangeeta; University of Toronto, Department of Medicine, Interdepartmental Division of Critical Care Medicine<br>Bernard, Francis; Hôpital du Sacré-Coeur de Montréal, Critical Care; Université de Montréal, Médecine |
| <b>Primary Subject Heading</b>: | Pharmacology and therapeutics                                                                                                                                                                                                                                                                                                                                                                                                                                                                                                                                                                                                                                                                                                                                                                                                                                                                                                                                                    |
| Secondary Subject Heading:      | Neurology, Mental health                                                                                                                                                                                                                                                                                                                                                                                                                                                                                                                                                                                                                                                                                                                                                                                                                                                                                                                                                         |
| Keywords:                       | Neurological injury < NEUROLOGY, REHABILITATION MEDICINE, Delirium & cognitive disorders < PSYCHIATRY                                                                                                                                                                                                                                                                                                                                                                                                                                                                                                                                                                                                                                                                                                                                                                                                                                                                            |
|                                 |                                                                                                                                                                                                                                                                                                                                                                                                                                                                                                                                                                                                                                                                                                                                                                                                                                                                                                                                                                                  |

SCHOLARONE™  
Manuscripts

1  
2  
3 1 **Pharmacological interventions for agitated behaviors in patients with traumatic**  
4 2 **brain injury: a systematic review**  
5 3

6 4 David R. Williamson, B.Pharm, M.Sc., Ph.D.<sup>1,2</sup> david.williamson@umontreal.ca  
7 5 Anne Julie Frenette, B.Pharm, M.Sc.<sup>1,2</sup> anne.julie.frenette@umontreal.ca  
8 6 Lisa Burry, B.Sc.Pharm, Pharm.D.<sup>3</sup> lisa.burry@sinaihealthsystem.ca  
9 7 Marc M. Perreault, B.Pharm, M.Sc., Pharm.D.<sup>2,4</sup> marc.perreault@umontreal.ca  
10 8 Emmanuel Charbonney, M.D., Ph.D.<sup>5,6</sup> emmanuel.charbonney@umontreal.ca  
11 9 François Lamontagne, M.D., M.Sc. FRCPC<sup>7</sup> francois.Lamontagne@USherbrooke.ca  
12 10 Marie-Julie Potvin, Ph.D.<sup>8</sup> potvin.marie\_julie@uqam.ca  
13 11 Jean-François Giguère, M.D., Ph.D. FRSC<sup>6,9</sup> jean-francois.giguere.1@umontreal.ca  
14 12 Sangeeta Mehta, M.D., FRCPC<sup>10</sup> geeta.Mehta@sinaihealthsystem.ca  
15 13 Francis Bernard, M.D. FRCPC<sup>5,6</sup> f.bernard@umontreal.ca  
16 14

17 15 <sup>1</sup> Pharmacy department and Research center, Hôpital du Sacré-Coeur de Montréal

18 16 <sup>2</sup> Faculté de pharmacie, Université de Montréal

19 17 <sup>3</sup> Department of Pharmacy and Medicine, Sinai Health System and Leslie Dan Faculty of  
20 18 Pharmacy, University of Toronto.

21 19 <sup>4</sup> Department of Pharmacy, McGill University Health Center

22 20 <sup>5</sup> Department of Critical Care and Research center, Hôpital du Sacré-Coeur de Montréal

23 21 <sup>6</sup> Faculté de Médecine, Université de Montréal

24 22 <sup>7</sup> Centre de recherche, CHU de Sherbrooke

25 23 <sup>8</sup> Department of medicine, Faculté de Médecine, Université de Sherbrooke

26 24 <sup>8</sup> Department of Psychology, Hôpital du Sacré-Coeur de Montréal and department of  
27 25 Psychology, Université du Québec à Montréal;

28 26 <sup>9</sup> Department of Neurosurgery, Hôpital du Sacré-Coeur de Montréal

29 27 <sup>10</sup> Department of Medicine, Interdepartmental Division of Critical Care Medicine, Mount  
30 28 Sinai Hospital and University of Toronto

31 29  
32 30 Corresponding author:

33 31 David Williamson, Ph.D.

34 32 Pharmacy department and research center

35 33 Hôpital du Sacré-Coeur de Montréal

36 34 5400 Gouin West

37 35 Montreal, Quebec

38 36 Canada, H4J 1C5  
39 37

40 38 **Author Disclosure Statement**

41 39 No competing financial interests exist.  
42 40

43 40 **Funding**

44 41 The study was supported by a Trauma consortium grant from the Fonds de recherche

45 42 du Québec –Santé  
46 43  
47 44  
48 45  
49 46  
50 47  
51 48  
52 49  
53 50  
54 51  
55 52  
56 53  
57 54  
58 55  
59 56  
60 57



1  
2  
3 43 **Patient and public involvement statement**  
4

5 44 This research was done without patient involvement. Patients were not invited to  
6  
7 45 comment on the study design and were not consulted to develop patient relevant  
8  
9 46 outcomes or interpret the results. Patients were not invited to contribute to the writing or  
10  
11 47 editing of this document for readability or accuracy.  
12  
13  
14

15 48  
16  
17 49 **Word count:** 3300 words  
18

19 50  
20  
21  
22  
23  
24  
25  
26  
27  
28  
29  
30  
31  
32  
33  
34  
35  
36  
37  
38  
39  
40  
41  
42  
43  
44  
45  
46  
47  
48  
49  
50  
51  
52  
53  
54  
55  
56  
57  
58  
59  
60

1  
2  
3 **51 Abstract**

4 **52**  
5 **53 Objective:** The aim of this systematic review was to assess the efficacy and safety of  
6  
7  
8 **54** pharmacological agents in the management of agitated behaviors following TBI.

9  
10 **55 Methods:** We performed a search strategy in PubMed, OvidMEDLINE®, Embase,  
11  
12 **56** CINAHL, PsycINFO, Cochrane Library, Google Scholar, Directory of Open Access  
13  
14 **57** Journals, LILACS, Web of Science and Prospero (up to December 10th 2018) for  
15  
16  
17 **58** published and unpublished evidence on the risks and benefits of 9 pre-specified  
18  
19 **59** medications classes used to control agitated behaviors following TBI. We included all  
20  
21 **60** randomized controlled trials, quasi-experimental and observational studies examining  
22  
23  
24 **61** the effects of medications administered to control agitated behaviors in TBI patients.  
25  
26 **62** Included studies were classified into 3 mutually exclusive categories: 1) agitated  
27  
28 **63** behavior was the presenting symptom; 2) agitated behavior was not the presenting  
29  
30 **64** symptom, but was measured as an outcome variable and; 3) safety of pharmacological  
31  
32 **65** interventions administered to control agitated behaviors was measured.

33  
34  
35 **66 Results:** Among the 181 articles assessed for eligibility, 21 studies were included. Of  
36  
37 **67** the studies suggesting possible benefits, propranolol reduced maximum intensities of  
38  
39 **68** agitation per week and physical restraint use, methylphenidate improved anger  
40  
41 **69** measures following 6 weeks of treatment, valproic acid reduced weekly agitated  
42  
43 **70** behavior scale ratings and olanzapine reduced irritability, aggressiveness and insomnia  
44  
45 **71** between weeks 1 and 3 of treatment. Amantadine showed variable effects and may  
46  
47 **72** increase the risk of agitation in the critically ill. In 3 studies evaluating safety outcomes,  
48  
49 **73** antipsychotics were associated with an increased duration of post-traumatic amnesia in  
50  
51 **74** unadjusted analyses. Small sample sizes, heterogeneity and an unclear risk of bias  
52  
53  
54 **75** were limits.

1  
2  
3 76 **Conclusions:** Propranolol, methylphenidate, valproic acid and olanzapine may offer  
4  
5 77 some benefit, however, they need to be further studied. Antipsychotics may increase the  
6  
7 78 length of post-traumatic amnesia. More studies on tailored interventions and continuous  
8  
9 79 evaluation of safety and efficacy throughout acute, rehabilitation and outpatient settings  
10  
11 80 are needed.  
12  
13  
14  
15 81

16  
17 82 **Systematic review registration:** Prospero CRD42016033140  
18

19 83 **Keywords:** Traumatic brain injury, agitation, Pharmacological intervention  
20  
21  
22 84

### 23 85 **Strengths and limitations of this study**

24  
25 86

- 27 87 ▪ This systematic review assessed the efficacy and safety of pharmacological agents  
28  
29 88 in the management of agitated behaviors following traumatic brain injury  
30  
31 89 ▪ Randomized controlled trials, quasi-experimental and observational studies were  
32  
33 90 reviewed  
34  
35 91 ▪ The included studies were limited by small sample sizes, variations in the different  
36  
37 92 agitated behaviors and populations studied  
38  
39 93 ▪ The review found insufficient data to recommend the use of any agent for the  
40  
41 94 management of agitated behaviors following TBI  
42  
43  
44  
45  
46 95
- 47  
48  
49  
50  
51  
52  
53  
54  
55  
56  
57  
58  
59  
60

## 96 Introduction

97 Traumatic brain injury (TBI) occurs when an external force is applied to the head leading  
98 to alterations in brain function including decreased level of consciousness, post-  
99 traumatic amnesia, and changes in behavior and cognition that can persist in the long  
100 term. In the United States alone, approximately 50,000 people die each year from TBI  
101 and more than 5 million live with TBI-related disabilities.<sup>1, 2</sup> While TBI has a substantial  
102 impact on direct healthcare costs, indirect costs from lost productivity also represent a  
103 significant economic burden.<sup>3, 4</sup> Agitated behaviors are a frequent behavioural problem  
104 following TBI.<sup>5, 6</sup> They have been broadly defined as a state of confusion that follows the  
105 initial injury and is characterised by disruptive behaviours. A constellation of behaviors  
106 has been associated with the term “agitation” in TBI patients, including restlessness,  
107 confusion, physical and verbal aggression, impulsivity, perceptual disturbances, and  
108 inattention creating a very heterogeneous group of patients to study.<sup>7</sup> Agitation has been  
109 reported in 20-41% of patients during the early stage of recovery in acute care units and  
110 up to 70% of patients in rehabilitation units.<sup>6, 8-13</sup> It can result in harm to patients and  
111 caregivers, interfere with treatments, lead to the use of physical and pharmacological  
112 restraints, increase hospital length of stay, delay rehabilitation and impede functional  
113 independence.<sup>10-12, 14-16</sup> In TBI outpatients, neurobehavioral symptoms may be different  
114 in nature. Aggressive behaviour and irritability, more than physical agitation are  
115 generally reported. A variety of agents such as antidepressants, anticonvulsants,  
116 stimulants, and antipsychotics have been used for the management of neurobehavioral  
117 complications of TBI.<sup>17, 18</sup> However, preclinical studies have suggested that repeated  
118 use of certain agents such as haloperidol, risperidone and diazepam may reduce  
119 cognitive and functional recovery.<sup>19-22</sup> Thus, it remains unclear which pharmacological

1  
2  
3 120 agents are the most effective and safest for the management of agitated behaviors in  
4  
5 121 TBI patients. A Cochrane Systematic Review published in 2006 showed a lack of  
6  
7 122 evidence to support any agent.<sup>23</sup> Since then, two additional systematic reviews  
8  
9 123 concluded that the evidence was insufficient and too weak to recommend any specific  
10  
11 124 agent, however they included only French and English studies published before January  
12  
13 125 2016, had incomplete search strategies, and did not include the grey literature.<sup>24, 25</sup> To  
14  
15 126 advance this field, we updated and broadened the literature search, included all  
16  
17 127 languages and included studies in which an agitated behaviour was not an eligibility  
18  
19 128 criterion, but was measured as an outcome variable . The aim of this systematic review  
20  
21 129 was to assess the efficacy and safety of pharmacological agents in the management of  
22  
23 130 agitated behaviors following TBI compared to placebo or other treatments.  
24  
25  
26  
27  
28  
29

131

## 132 **Methods**

133 The review protocol has been registered in PROSPERO International Prospective  
134 Register of Systematic Reviews (CRD42016033140), conducted according to the  
135 Preferred Reporting Items for Systematic Review and Meta-Analysis (PRISMA)  
136 guidelines and published in a peer-reviewed journal.<sup>26, 27</sup> We included all randomized  
137 controlled, quasi-experimental, and observational studies with control groups that had a  
138 majority (>50%) of patients with TBI. We excluded case reports, case series, and  
139 observational studies without control groups. We included studies of all type of patients  
140 who suffered a TBI, including children and adults, in both the early stages of recovery  
141 and in rehabilitation. We included 3 mutually exclusive types of studies: 1) those  
142 evaluating the use of pharmacological interventions in which an agitated behaviour, not

1  
2  
3 143 further defined, was one of the eligibility criteria for the study; 2) those in which an  
4  
5 144 agitated behaviour was not an eligibility criterion, but was measured as an outcome  
6  
7 145 variable; and 3) those specifically assessing the safety of pharmacological agents used  
8  
9 146 to treat agitation in TBI patients. In this systematic review, we considered agitation,  
10  
11 147 aggressiveness, assaultive behaviour, irritability and confusion as part of agitated  
12  
13 148 behaviours. All medications considered in this review were pre-specified and consisted  
14  
15 149 in the following: beta-adrenergic blockers, typical and atypical antipsychotics,  
16  
17 150 anticonvulsants, dopamine agonists, psychostimulants, antidepressants, alpha-2-  
18  
19 151 adrenergic agonists, hypnotics and anxiolytics. Studies were included whether the  
20  
21 152 investigators compared a medication to placebo, a medication to another medication, or  
22  
23 153 various combinations of different medications.  
24  
25  
26  
27  
28

29 154 The primary outcome was a reduction in severity of the agitated behavior as measured  
30  
31 155 in each study. If feasible, we reported resolution of agitated behaviours as well as  
32  
33 156 changes in duration and type of symptoms (confusion, aggressiveness, inattention,  
34  
35 157 hallucinations, disorientation, and inappropriate mood or speech). Secondary outcomes  
36  
37 158 include lengths of stay, (ICU length of stay, hospital LOS for the early rehabilitation  
38  
39 159 phase), adverse events (extrapyramidal effects, QTc prolongation, cardiac arrhythmias,  
40  
41 160 hypotension, seizures, behavioural effects), use of physical restraints in ICU, cognitive  
42  
43 161 and functional outcomes at hospital discharge and at one year post-TBI.  
44  
45  
46  
47  
48

### 49 162 *Search strategy*

50  
51  
52 163 A search strategy was devised with the help of Health Sciences librarian (supplementary  
53  
54 164 file) and using the Peer Review for Electronic Search Strategies (PRESS) checklist was  
55  
56  
57  
58  
59  
60

1  
2  
3 165 conducted in the following databases: PubMed, OvidMEDLINE®,OvidMEDLINE®In-  
4  
5 166 Process&OtherNon-Indexed Citations, Embase, CINAHL, PsycINFO, Cochrane Library,  
6  
7 167 Google Scholar, Directory of Open Access Journals, LILACS, Web of Science and  
8  
9  
10 168 Prospero (<http://www.crd.york.ac.uk/PROSPERO/>) up to December 10th 2018.<sup>28</sup> A grey  
11  
12 169 literature search was also performed using the resources suggested in CADTH's *Grey*  
13  
14 170 *Matters* (<http://www.cadth.ca/en/resources/finding-evidence-is/grey-matters>). As  
15  
16  
17 171 described in our published protocol, we searched abstracts from annual scientific  
18  
19 172 meetings from relevant groups in the last 5 years.<sup>26</sup> Finally, references of identified  
20  
21 173 studies as well as other types of articles (reviews, book chapters) were screened.  
22  
23  
24 174

#### 25 26 175 *Data collection and analysis*

27  
28 176 Two reviewers (DW, AJF) independently screened titles and abstracts for eligible  
29  
30 177 publications. The same reviewers then assessed the complete report of each retained  
31  
32 178 citations for eligibility. Disagreements were resolved by consensus and discussion with a  
33  
34 179 third reviewer was not required.  
35  
36  
37  
38 180

#### 39 40 181 *Data extraction and management*

41  
42  
43 182 Data from all included studies were extracted by two independent reviewers (AJF and  
44  
45 183 DW) and in duplicate using a pre-tested data extraction form. The following variables  
46  
47 184 were recorded for each study: study title, name of the first author, year of publication,  
48  
49 185 country of origin, language of publication, publication type (journal article, conference  
50  
51 186 proceeding, abstract, thesis), clinical setting (intensive care unit, hospital ward,  
52  
53 187 rehabilitation unit, outpatient), study design (randomized controlled, blinded or open,  
54  
55  
56  
57  
58  
59  
60

1  
2  
3 188 non-randomized controlled, prospective or retrospective, crossover), population  
4  
5 189 (paediatric, adult), patient characteristics (age, gender, isolated TBI or multiple trauma  
6  
7 190 including TBI, severity of TBI according to Glasgow Coma Scale, days from TBI at  
8  
9 191 inclusion, inclusion and exclusion criteria), characteristics of the intervention and control  
10  
11 192 treatment (type of pharmacological agent, dose, frequency and duration of the therapy),  
12  
13 193 agitation measurement tool, description of the specific agitated behaviours (definition,  
14  
15 194 frequency, duration), and clinical outcomes (length of stay), adverse events, use of  
16  
17 195 physical restraints during ICU stay, duration of post traumatic amnesia, cognitive  
18  
19 196 function at ICU discharge and at one year, and functional outcome at ICU discharge and  
20  
21 197 at one year. We contacted the corresponding author for clarifications when necessary.  
22  
23  
24  
25  
26  
27  
28

29 198  
30 199 *Assessment of risk of bias*  
31  
32 200 Two reviewers (DW, AJF) independently evaluated each included study with the  
33  
34 201 Cochrane Collaboration tool for randomized controlled trials and the Ottawa-Newcastle  
35  
36 202 tool for observational studies, respectively.<sup>29, 30</sup>. In case of disagreement concerning the  
37  
38 203 risk of bias, a third reviewer (FB) was consulted to resolve the issue.  
39  
40

#### 41 204 *Patient and public involvement*

42  
43 205 Patients and or public were not involved in the conduct of this systematic review.  
44  
45

## 46 206 **Results**

### 47 207 *Study selection*

48 208  
49 209 The database search (up to December 10th 2018) retrieved 11 170 unique citations of  
50 210  
51 211 which 10 989 were excluded based on title and abstracts (Figure 1). We assessed 181  
52  
53 212 full-text articles for eligibility and 21 studies were included. A total of eight studies  
54  
55  
56 213



1  
2  
3 214 evaluated the use of pharmacological interventions in which an agitated behaviour was  
4  
5 215 the presenting symptom or one of the presenting symptoms.<sup>31-38</sup> In nine other studies,  
6  
7 216 agitated behaviour was not the presenting symptom, but was measured as an outcome  
8  
9  
10 217 variable.<sup>39-47</sup> Finally, four studies specifically assessed the safety of pharmacological  
11  
12 218 agents used for agitated behaviours in TBI.<sup>48-51</sup>  
13

14  
15 219 *Agitated behaviors as the presenting symptom*  
16

17 220  
18 221 The eight included studies evaluated various aspects ranging from aggressiveness to  
19  
20 222 irritability and confusion (Table 1).<sup>31-38</sup>. The behaviors were evaluated using the following  
21  
22 223 tools (Table 2): agitated behavior scale (ABS), confusion assessment protocol, State-  
23  
24 224 Trait Anger scale, the overt aggression scale, Richmond Agitation Sedation Scale  
25  
26 225 (RASS) and neuropsychiatric inventory irritability and aggression domains (NPI-I and  
27  
28 226 NPI-A).<sup>52</sup>  
29  
30  
31  
32 227  
33  
34  
35  
36  
37  
38  
39  
40  
41  
42  
43  
44  
45  
46  
47  
48  
49  
50  
51  
52  
53  
54  
55  
56  
57  
58  
59  
60

228 **Table 1 – Study characteristics**

| Study/Year<br>(N)                               | Publication/<br>Country | Study<br>design            | Study<br>focus/Population                          | Interventional<br>arm/Population           | Comparative<br>arm/Population      | Location at<br>randomization                                      | Timing from TBI<br>at randomization            | TBI<br>description            |
|-------------------------------------------------|-------------------------|----------------------------|----------------------------------------------------|--------------------------------------------|------------------------------------|-------------------------------------------------------------------|------------------------------------------------|-------------------------------|
| 1. Agitated behaviour as the presenting symptom |                         |                            |                                                    |                                            |                                    |                                                                   |                                                |                               |
| Brooke <sup>30</sup><br>1992<br>N=21            | Published<br>USA        | RCT<br>parallel            | Agitation<br>Mean age 31<br>87 men and 13<br>women | Propranolol 60-<br>420mg daily             | Placebo                            | Level 1<br>trauma and<br>rehabilitation<br>center                 | N/A                                            | Severe blunt<br>TBI           |
| Mooney <sup>31</sup><br>1993<br>N=38            | Published<br>USA        | Randomize<br>d<br>Pre-post | Anger<br>Mean age 29 ± 10<br>Male gender<br>100%   | Methylphenidate<br>30mg/day                | Placebo                            | Outpatient                                                        | 6 months or<br>more (mean 27<br>+/- 21 months) | Severe blunt<br>TBI           |
| Yablon<br>2010 <sup>32</sup><br>N=79            | Abstract<br>USA         | RCT<br>parallel            | Confusion<br>Age and gender<br>not reported        | Amantadine<br>100mg bid X 14<br>days       | Placebo                            | Inpatient brain<br>injury unit of a<br>rehabilitation<br>hospital | ≤ 6 months                                     | TBI not<br>further<br>defined |
| Hammond <sup>34</sup><br>2014<br>N=76           | Published<br>USA        | RCT<br>parallel            | Irritability and<br>aggression                     | Amantadine<br>100mg bid<br>Mean age 40 +/- | Placebo<br>38 +/-12<br>Male gender | Outpatient                                                        | ≥ 6 months<br>following a TBI                  | Blunt TBI                     |

|                                                   |                    |                                 |                                                           |                                                                        |                                                        |            |                               |                               |
|---------------------------------------------------|--------------------|---------------------------------|-----------------------------------------------------------|------------------------------------------------------------------------|--------------------------------------------------------|------------|-------------------------------|-------------------------------|
|                                                   |                    |                                 |                                                           | 13<br>Male gender<br>74.4%                                             | 80.5%                                                  |            |                               |                               |
| Beresford <sup>30</sup><br>2015<br>N=50           | Abstract<br>USA    | RCT<br>parallel                 | Agitation<br>Mean age 47 ± 14<br>46 men and 4<br>women    | Valproic acid<br>for level 50-100<br>mcg/ml                            | Placebo                                                | Outpatient | > 1 year<br>following TBI     | Mild and<br>moderate<br>TBI   |
| Hammond <sup>33</sup><br>2015<br>N=168            | Published<br>USA   | RCT<br>parallel                 | Irritability and<br>aggression                            | Amantadine<br>100mg bid<br>Mean age 40 ±<br>13<br>Male gender<br>80.5% | Placebo<br>Mean age 38 ±<br>12<br>Male gender<br>74.4% | Outpatient | ≥ 6 months<br>following a TBI | Blunt TBI                     |
| Maturana <sup>37</sup><br>Waidele<br>2009<br>N=31 | Published<br>Chile | Prospective<br>double-<br>blind | Restlessness,<br>Irritability,<br>Aggression,<br>Insomnia | Olanzapine (dose<br>not specified)                                     | Placebo                                                | Outpatient | N/A                           | TBI not<br>further<br>defined |

|                                                    |                        |                                | Age and gender<br>not reported                                            |                                                                      |                                                            |                              |                                     |                               |
|----------------------------------------------------|------------------------|--------------------------------|---------------------------------------------------------------------------|----------------------------------------------------------------------|------------------------------------------------------------|------------------------------|-------------------------------------|-------------------------------|
| Gramish <sup>35</sup><br>2017<br>N=139             | Published<br>USA       | Retrospective<br>observational | Agitation                                                                 | Amantadine<br>100mg bid<br>Mean age 42 ± 17<br>Male gender:<br>81.4% | No amantadine<br>Mean age 48 ± 21<br>Male gender:<br>76.8% | Adult Trauma<br>ICU          | Acute TBI                           | TBI not<br>further<br>defined |
| 2. Agitated behavior is not the presenting symptom |                        |                                |                                                                           |                                                                      |                                                            |                              |                                     |                               |
| Study/Year<br>(N)                                  | Publication<br>Country | Study<br>design                | Study focus                                                               | Interventional<br>arm                                                | Comparative<br>arm                                         | Location at<br>randomization | Timing from TBI<br>at randomization | TBI<br>description            |
| Schneider <sup>41</sup><br>1999<br>N=10            | Published<br>USA       | RCT<br>parallel                | Cognitive function<br>and behavior<br>Mean age 31<br>7 men and 3<br>women | Amantadine<br>50mg bid<br>increased to<br>150mg bid                  | Placebo                                                    | Outpatient                   | N/A                                 | Moderate<br>and severe<br>TBI |
| Meythaler <sup>40</sup><br>2001 N=9                | Published<br>USA       | RCT<br>Crossover               | Recovery and<br>arousal<br>Age and gender<br>not reported                 | Sertraline                                                           | Placebo                                                    | Inpatient<br>rehabilitation  | < 2 weeks of<br>TBI                 | Severe TBI                    |
| Meythaler <sup>42</sup>                            | Published              | RCT                            | Neurological                                                              | Amantadine                                                           | Placebo                                                    | Emergency                    | Between 4 days                      | Severe blunt                  |

|                                                                           |                                         |                  |                                                  |                                                           |                                                       |                                        |                                                          |                                                |
|---------------------------------------------------------------------------|-----------------------------------------|------------------|--------------------------------------------------|-----------------------------------------------------------|-------------------------------------------------------|----------------------------------------|----------------------------------------------------------|------------------------------------------------|
| 2002<br>N=35                                                              | USA                                     | Crossover        | recovery<br>Mean age 31<br>26 men and 9<br>women |                                                           |                                                       | department                             | and 6 weeks<br>following TBI                             | TBI                                            |
| Banos <sup>38</sup><br>2010<br>N=99                                       | Published<br>USA                        | RCT<br>parallel  | Cognitive function<br>and behavior               | Sertraline<br>Mean age: 35 ±<br>17<br>Male gender:<br>79% | Placebo<br>Mean age 35 ±<br>16<br>Male gender:<br>66% | Level 1<br>trauma center<br>inpatients | < 8 weeks of<br>TBI                                      | Moderate<br>and severe<br>TBI                  |
| Giacino <sup>39</sup><br>2012<br>N=184                                    | Published<br>USA,<br>Denmark,<br>Canada | RCT<br>parallel  | Functional<br>recovery                           | Amantadine<br>Mean age: 35±15<br>Male gender:<br>74%      | Placebo<br>Mean age:<br>37±15<br>Male gender:<br>71%  | Inpatients                             | 4 to 16 weeks<br>following TBI                           | Vegetative or<br>minimally<br>conscious<br>TBI |
| Tramontana <sup>43</sup><br>2014<br>N=22 but 13<br>completed the<br>study | Published<br>USA                        | RCT<br>Crossover | Attention<br>Mean age: 29±9<br>Male gender: 69%  | Lisdexampheta-<br>mine                                    | Placebo                                               | Outpatient                             | 6-34 months<br>(mean 15.6 +/-<br>10 months)<br>since TBI | Moderate<br>and severe<br>TBI                  |

1  
2  
3  
4  
5  
6  
7  
8  
9  
10  
11  
12  
13  
14  
15  
16  
17  
18  
19  
20  
21  
22  
23  
24  
25  
26  
27  
28  
29  
30  
31  
32  
33  
34  
35  
36  
37  
38  
39  
40  
41  
42  
43  
44  
45  
46  
47

|                                                                                               |                     |                                        |                                                                               |                                                                         |                                                                       |                                        |                              |                                 |
|-----------------------------------------------------------------------------------------------|---------------------|----------------------------------------|-------------------------------------------------------------------------------|-------------------------------------------------------------------------|-----------------------------------------------------------------------|----------------------------------------|------------------------------|---------------------------------|
| Johansson <sup>45</sup><br>2014<br>N=24                                                       | Published<br>Sweden | RCT<br>Crossover                       | Mental fatigue<br>and cognition<br><br>Mean age 39±11<br><br>Male gender: 50% | Methylphenidate<br><br>5mg and 20mg<br><br>tid                          | Placebo                                                               | Outpatient                             | > 12 months<br>following TBI | Mild or<br>moderate<br>TBI      |
| Fann <sup>44</sup><br>2017<br>N=62                                                            | Published<br>USA    | RCT<br>parallel                        | Major depression                                                              | Sertraline<br><br>Mean age: 38±12<br><br>Male gender:<br>74%            | Placebo<br><br>Mean age:<br>37±13<br><br>Male gender:<br>77%          | Level 1<br>trauma center               | < 1 year of TBI              | Moderate<br>and severe<br>TBI   |
| Hart <sup>46</sup><br>2017<br>N=32                                                            | Published<br>USA    | RCT<br>parallel                        | Cognitive function                                                            | Dextroamphetami<br>ne<br><br>Mean age: 39±16<br><br>Male gender:<br>65% | Placebo<br><br>Mean age:<br>39±18<br><br>Male gender:<br>100%         | TBI<br>rehabilitation<br>unit          | < 6 months of<br>TBI         | Moderate<br>and severe<br>TBI   |
| 3. Studies assessing the safety of pharmacological agents used for agitated behaviours in TBI |                     |                                        |                                                                               |                                                                         |                                                                       |                                        |                              |                                 |
| Rao 1985 <sup>49</sup><br>N=26                                                                | Published<br>USA    | Retrospecti<br>ve<br>observation<br>al | Rehabilitation<br>outcomes                                                    | Haloperidol<br><br>Median age: 34<br><br>Gender not<br>reported         | No haloperidol<br><br>Median age:<br>22<br><br>Gender not<br>reported | Trauma and<br>rehabilitation<br>center | From admission               | Severe<br>closed head<br>injury |

|                                                                                                                                                          |                                         |                  |                                        |                                                                                                                                         |                                                     |                                                        |                                                             |                |                               |
|----------------------------------------------------------------------------------------------------------------------------------------------------------|-----------------------------------------|------------------|----------------------------------------|-----------------------------------------------------------------------------------------------------------------------------------------|-----------------------------------------------------|--------------------------------------------------------|-------------------------------------------------------------|----------------|-------------------------------|
| 1<br>2<br>3<br>4<br>5<br>6<br>7<br>8<br>9<br>10<br>11<br>12                                                                                              | Mysiw <sup>48</sup><br>2006<br>N=182    | Published<br>USA | Retrospecti<br>ve cohort               | Cognitive and<br>motor recovery<br>Mean age: 36<br>Male gender: 74%                                                                     | Narcotics,<br>benzodiazepines<br>and neuroleptics   | No CNS active<br>medications                           | Level 1<br>trauma center<br>and<br>rehabilitation<br>center | From admission | TBI                           |
| 13<br>14<br>15<br>16<br>17<br>18<br>19<br>20<br>21                                                                                                       | Kooda <sup>50</sup><br>2015<br>N=195    | Abstract<br>USA  | Retrospecti<br>ve<br>observation<br>al | Duration of post-<br>traumatic<br>amnesia<br>Age and gender<br>not reported                                                             | Antipsychotics                                      | No<br>antipsychotic                                    | Level 1<br>trauma center<br>and<br>rehabilitation<br>center | From admission | TBI                           |
| 22<br>23<br>24<br>25<br>26<br>27<br>28<br>29<br>30<br>31<br>32<br>33<br>34<br>35<br>36<br>37<br>38<br>39<br>40<br>41<br>42<br>43<br>44<br>45<br>46<br>47 | Anderson <sup>47</sup><br>2016<br>N=101 | Published<br>USA | Retrospecti<br>ve cohort               | Seizures,<br>neuroleptic<br>malignant<br>syndrome, QTc<br>prolongation,<br>extrapyramidal<br>symptoms,<br>hematological<br>disturbances | Haloperidol<br>Median age 32<br>Male gender:<br>87% | No haloperidol<br>Median age 47<br>Male gender:<br>61% | Inpatients                                                  | From admission | Moderate<br>and severe<br>TBI |

230 **Table 2 – Tools used to measure agitated behaviors**

| Tools                                                                              | Description                                                                                                                                                                                     |
|------------------------------------------------------------------------------------|-------------------------------------------------------------------------------------------------------------------------------------------------------------------------------------------------|
| Agitated behavior scale <sup>53</sup>                                              | Scale of 14 items with 4 levels of scoring to assess the nature and extent of agitation during the acute recovery of traumatic brain. Total scores greater than 21 are considered as agitation. |
| Brief Anger and Aggression Scale <sup>54</sup>                                     | A six-item measure developed for the rapid screening and identification of anger and aggression levels.                                                                                         |
| Confusion assessment protocol <sup>55</sup>                                        | Combination of orientation, cognition and other clinical measures of early confusion following traumatic brain injury.                                                                          |
| Functional independence measure (FIM) <sup>56</sup>                                | Functional assessment measure with a 18-item ordinal scale used in the rehabilitation population. It offers a useful assessment of patient progress during inpatient rehabilitation.            |
| Global improvement subscale of the Clinical Global Impressions (CGI) <sup>57</sup> | The CGI is a 3-item observer-rated scale that measures illness severity (CGIS), global improvement or change (CGIC) and therapeutic response.                                                   |
| Belligerence cluster score for the Katz adjustment scale (KAS) <sup>58</sup>       | The KAS is an observer rating scale used to assess the social adjustment of people with traumatic brain injury.                                                                                 |
| Neuropsychiatric inventory irritability                                            | The NPI is a 40-item scale evaluating 12 behavioral domains including irritability and                                                                                                          |



|                                                                  |                                                                                                                                                                                                                                                                                                                                                                                                                                                                                                                                                                 |
|------------------------------------------------------------------|-----------------------------------------------------------------------------------------------------------------------------------------------------------------------------------------------------------------------------------------------------------------------------------------------------------------------------------------------------------------------------------------------------------------------------------------------------------------------------------------------------------------------------------------------------------------|
| <p>(NPI-I) and aggression domains<br/>(NPI-A)<sup>52</sup></p>   | <p>aggression. The NPI irritability (NPI-I) items include bad temper, rapid mood changes, sudden anger, impatience, crankiness, and argumentative. Raters evaluate frequency and severity of behaviors in the last month. The NPI aggression domain assesses the tendency to get upset, resistance to activities, stubbornness, uncooperativeness, shouting, cursing, and physical behaviors indicative of aggression. The NPI score is the product of frequency and severity. The worst item score provided by the scorer is NPI-I or NPI-A most aberrant.</p> |
| <p>Neurobehavioral Function Inventory<br/>(NFI)<sup>59</sup></p> | <p>The NFI provides information on the frequency of behaviors and symptoms commonly associated with brain injury. Two versions of the NFI are available, one for completion by family members, another for completion by the person with the injury.</p>                                                                                                                                                                                                                                                                                                        |
| <p>Neurobehavioral rating scale<br/>(NRS)<sup>60</sup></p>       | <p>The NRS is a 28-item observer-rated instrument that measures a broad range of cognitive and noncognitive symptoms. It measures symptoms associated with psychiatric disorders as well as cognitive impairment and behavioral disturbances.</p>                                                                                                                                                                                                                                                                                                               |
| <p>Overt aggression scale (OAS)<sup>61</sup></p>                 | <p>Scale for the objective rating of verbal and physical aggression. The OAS measures aggressive behaviors divided into 4 categories: verbal aggression, physical aggression against objects, physical aggression against self, and physical aggression against others.</p>                                                                                                                                                                                                                                                                                     |

1  
2  
3  
4  
5  
6  
7  
8  
9  
10  
11  
12  
13  
14  
15  
16  
17  
18  
19  
20  
21  
22  
23  
24  
25  
26  
27  
28  
29  
30  
31  
32  
33  
34  
35  
36  
37  
38  
39  
40  
41  
42  
43  
44  
45  
46  
47

|                                                                                 |                                                                                                                                                                                                                                                                                                                                                               |
|---------------------------------------------------------------------------------|---------------------------------------------------------------------------------------------------------------------------------------------------------------------------------------------------------------------------------------------------------------------------------------------------------------------------------------------------------------|
| Anger-Hostility factor score of the Profile of Mood States (POMS) <sup>32</sup> | The POMS consists of 65 adjectives that describe moods or feelings, to which the patient responds on a 5-point scale that ranges from “Not at all” to “Extremely”. The POMS measures six identifiable mood/affective states: tension-anxiety, depression-dejection, anger-hostility, vigor-activity (V); fatigue-inertia (F), and confusion-bewilderment (C). |
| State-Trait Anger Scale (STAS) <sup>32</sup>                                    | The STAS is a 20-item self-report scale assessing two types of anger (State and Strait). State anger is comprised of tension, annoyance, irritability or rage. Whereas trait anger is the frequency with which a person feels state anger over time.                                                                                                          |

1  
2  
3 232 Of the identified studies, two were conference abstracts that remained unpublished.<sup>33, 37</sup>  
4  
5 233 The studies evaluated propranolol<sup>31</sup>, amantadine<sup>33-35</sup>, methylphenidate<sup>32</sup>, valproic acid<sup>37</sup>  
6  
7 234 and olanzapine<sup>38</sup> in comparison to placebo. Five used a randomized controlled parallel  
8  
9 235 design<sup>31, 33-35, 37</sup>, one used a randomized pretest posttest control group design<sup>32</sup>, one  
10  
11 236 was a prospective double blind observational study<sup>38</sup> and, one was a retrospective  
12  
13 237 observational study.<sup>36</sup> All the studies exclusively enrolled adult (16 years or older) TBI  
14  
15 238 patients and three studies excluded older patients (greater than 65 or 75 years)<sup>34, 35, 37</sup>.  
16  
17 239 The studies mostly included patients in rehabilitation (n=2)<sup>31, 33</sup> and outpatient (n=5)  
18  
19 240 settings.<sup>32, 34, 35, 37, 38</sup> Only one study evaluated patients in an intensive care unit (ICU)  
20  
21 241 setting.<sup>36</sup> All the studies exclusively studied TBI patients.<sup>31-38</sup> Three studies identified in  
22  
23 242 an earlier systematic review were excluded (Figure 1) because TBI patients represented  
24  
25 243 less than 50% of the sample.<sup>23, 62-64</sup>  
26  
27  
28  
29  
30  
31 244  
32  
33 245 In the eight studies, one randomized trial evaluated the use of propranolol for the  
34  
35 246 treatment of agitation in severe blunt TBI patients (Table 3).<sup>31</sup> It reported a reduction in  
36  
37 247 the intensity of agitation episodes and in the use of physical restraints but failed to show  
38  
39 248 a reduction in the frequency of agitation episodes.<sup>31</sup> Amantadine was evaluated for the  
40  
41 249 management of confusion in a randomized trial, irritability in two randomized trials, and  
42  
43 250 agitation in a retrospective observational study.<sup>33-36</sup> The studies reported inconsistent  
44  
45 251 results (Table 3). In one unpublished study in the setting of rehabilitation within 90 days  
46  
47 252 of TBI (n=79), amantadine had no effect on confusion.<sup>33</sup> In a pilot study of outpatients  
48  
49 253 who suffered a TBI more than six months ago, amantadine showed significant  
50  
51 254 reductions in irritability and aggression using the Neuropsychiatric Inventory scale  
52  
53 255 (NPI).<sup>35</sup> In a follow-up study of 168 outpatients who had suffered a TBI more than 6  
54  
55  
56  
57  
58  
59  
60

1  
2  
3 256 months ago, no difference in the incidence of irritability at 28 and 60 days using the NPI-  
4  
5 257 I from observers (family member, close friend, or employer) was reported.<sup>34</sup> Participants  
6  
7 258 self-rating at day-60 indicated improvement in irritability ( $p<0.04$ ) but the difference  
8  
9  
10 259 became non-significant when adjusted for multiple comparisons. The Global  
11  
12 260 improvement subscale of the Clinical Global Impressions (CGI), which evaluates general  
13  
14 261 emotional and behavioral function, improved more in the amantadine group than in the  
15  
16 262 placebo group at day 60 ( $p=0.0354$ ). A sub-analysis of patients with anger and  
17  
18 263 aggression (118 of the 168 patients) in the same study was also carried out and  
19  
20 264 reported a statistically significant reduction in participant's self-rated aggression at 60  
21  
22 265 days.<sup>65</sup> Finally, in a retrospective observational study ( $n=139$ ), patients exposed to  
23  
24 266 amantadine in the ICU reported more agitation episodes defined as a Richmond  
25  
26 267 Agitation Sedation Score of +2 or higher (38% vs 14%) in an unadjusted analysis.<sup>36</sup> The  
27  
28 268 use of amantadine was also associated with an increased median ICU length of stay  
29  
30 269 (4.5 vs 3 days;  $p=0.01$ ) when compared to non-exposed patients.  
31  
32  
33  
34  
35  
36

37  
38 271 The efficacy of olanzapine in the management of restlessness, irritability, aggression  
39  
40 272 and insomnia in outpatients with a history of TBI was evaluated in a prospective double  
41  
42 273 blind study.<sup>38</sup> While no reduction in restlessness was reported, the authors did report a  
43  
44 274 significant reduction in irritability and insomnia between weeks 1 and 3 in olanzapine-  
45  
46 275 treated patients. Unfortunately, no statistical comparison with the placebo group was  
47  
48 276 provided. The efficacy of valproic acid in reducing agitated behaviors among mild and  
49  
50 277 moderate TBI outpatients was evaluated in an unpublished randomized controlled study  
51  
52 278 ( $n=50$ ).<sup>37</sup> Patients were included more than one year following brain injury and suffered  
53  
54 279 from both affective lability and alcohol dependence. A significant reduction in the  
55  
56  
57  
58  
59  
60

280 **Table 3 – Efficacy and safety outcomes**

| Study/Year/n                                          | Intervention    | Agitated behavior measures                                                                                                                                   | Efficacy outcomes                                                                                                                                                                                                                  | Safety outcomes                                  |
|-------------------------------------------------------|-----------------|--------------------------------------------------------------------------------------------------------------------------------------------------------------|------------------------------------------------------------------------------------------------------------------------------------------------------------------------------------------------------------------------------------|--------------------------------------------------|
| <b>1. Agitated behavior as the presenting symptom</b> |                 |                                                                                                                                                              |                                                                                                                                                                                                                                    |                                                  |
| <i>Randomized controlled studies</i>                  |                 |                                                                                                                                                              |                                                                                                                                                                                                                                    |                                                  |
| Brooke <sup>30</sup><br>1992<br>N=21                  | Propranolol     | Overt aggression scale                                                                                                                                       | Significant reduction in maximum intensities of agitation per week (p<0.05). No significant difference in average number of agitation episodes per week. Significant reduction in physical restraint use during the study (p<0.05) | No safety outcomes reported                      |
| Mooney 1993 <sup>31</sup><br>N=38                     | Methylphenidate | State-Trait Anger Scale, Belligerence cluster score for the Katz adjustment scale and the Anger-Hostility factor score, Organic Signs and Symptoms Inventory | Significant difference in the comparison of methylphenidate and placebo group on all the anger measures before and after 6 weeks in a multivariate analysis p=0.02).                                                               | No significant effect on side effects            |
| Yablon 2010 <sup>32</sup><br>N=79                     | Amantadine      | Confusion assessment protocol                                                                                                                                | No significant differences in the number of symptoms of posttraumatic confusional state as measured by                                                                                                                             | No patients withdrawn because of safety criteria |

|                                      |               |                                                                                          |                                                                                                                                                                                                                                                                                                                                                                                                                    |                                                                                                                                  |
|--------------------------------------|---------------|------------------------------------------------------------------------------------------|--------------------------------------------------------------------------------------------------------------------------------------------------------------------------------------------------------------------------------------------------------------------------------------------------------------------------------------------------------------------------------------------------------------------|----------------------------------------------------------------------------------------------------------------------------------|
|                                      |               | (CAP)                                                                                    | the CAP at 14 days (amantadine 2.56 vs placebo 2.7; p=0.57). Mean difference in time to first "nonconfused" CAP score between groups approached significance (amantadine 7.7 days and placebo 9.3 days; p=0.053)                                                                                                                                                                                                   |                                                                                                                                  |
| Hammond 2014 <sup>34</sup><br>N=76   | Amantadine    | NPI-I most aberrant and most problematic Irritability (NPI-I) and aggressiveness (NPI-A) | Significant reduction in irritability (80.56% improved at least 3 points on the NPI-I, compared with 44.44% in the placebo group; p=0.0016). Mean change in NPI-I was -4.3 in the amantadine group and -2.6 in the placebo group (P = .0085). When excluding individuals with minimal to no baseline aggression, mean change in NPI-A was -4.56 in the amantadine group and -2.46 in the placebo group (P = .046). | No difference in adverse events (tremors, appetite, gastrointestinal, aches and pain, sexual problems, disorientation, seizures) |
| Beresford 2015 <sup>30</sup><br>N=50 | Valproic acid | Agitated Behavior Scale by spouse or significant other                                   | Significant others' weekly Agitated Behavior Scale ratings were statistically lower, indicating less agitation in the valproic acid group, 12.9 +/- 4.9, than in the placebo group, 15.5 +/- 6.6, with significance at p=0.0367.                                                                                                                                                                                   | No safety outcomes reported                                                                                                      |

|                                                                                                             |                                                        |            |                                                                                                                                        |                                                                                                                                                                                                                                                                                                                                           |                                                                                  |
|-------------------------------------------------------------------------------------------------------------|--------------------------------------------------------|------------|----------------------------------------------------------------------------------------------------------------------------------------|-------------------------------------------------------------------------------------------------------------------------------------------------------------------------------------------------------------------------------------------------------------------------------------------------------------------------------------------|----------------------------------------------------------------------------------|
| 1<br>2<br>3<br>4<br>5<br>6<br>7<br>8<br>9<br>10<br>11<br>12<br>13<br>14<br>15<br>16<br>17<br>18<br>19<br>20 | Hammond 2015 <sup>33</sup><br><br>N=168                | Amantadine | NPI-I most problematic by observer and by patient. Global improvement subscale of the Clinical Global Impressions (CGI) by physicians. | Observer ratings were not different at day 28 or 60. Participants rating at day 60 showed improvement in NPI-I most problematic ( $p < 0.04$ ; but NS for when adjusted for multiple comparisons). Physician's assessment of global improvement improved more in the amantadine group than the placebo group at 60 days ( $p = 0.0354$ ). | Well tolerated with no significant differences in adverse events between groups. |
| 21                                                                                                          | <i>Observational studies</i>                           |            |                                                                                                                                        |                                                                                                                                                                                                                                                                                                                                           |                                                                                  |
| 22<br>23<br>24<br>25<br>26<br>27<br>28<br>29<br>30<br>31<br>32<br>33<br>34<br>35                            | Maturana Waidele <sup>37</sup><br><br>2009<br><br>N=31 | Olanzapine | Restlessness, irritability, aggressiveness and insomnia. No tool mentioned.                                                            | Reduction in irritability ( $p < 0.001$ ), aggressiveness ( $p = 0.008$ ) and insomnia ( $p = .0011$ ) between weeks 1 and 3 in the patients treated with olanzapine                                                                                                                                                                      | No safety outcomes reported                                                      |
| 36<br>37<br>38<br>39<br>40<br>41<br>42<br>43<br>44<br>45<br>46<br>47                                        | Gramish 2017 <sup>35</sup><br><br>N=139                | Amantadine | RASS score of +2 or higher                                                                                                             | Increase in agitation in patients exposed to amantadine (38%) compared to non-exposed (14%); $p = 0.018$ . Increase in median ICU length of stay (4.5                                                                                                                                                                                     | No safety outcomes reported                                                      |

1  
2  
3  
4  
5  
6  
7  
8  
9  
10  
11  
12  
13  
14  
15  
16  
17  
18  
19  
20  
21  
22  
23  
24  
25  
26  
27  
28  
29  
30  
31  
32  
33  
34  
35  
36  
37  
38  
39  
40  
41  
42  
43  
44  
45  
46  
47

|                                                           |            |                                                                                              |                                                                                                                                                                |                                                                                    |
|-----------------------------------------------------------|------------|----------------------------------------------------------------------------------------------|----------------------------------------------------------------------------------------------------------------------------------------------------------------|------------------------------------------------------------------------------------|
|                                                           |            |                                                                                              | vs 3 days; p=0.01). Median hospital length of stay was non-significantly increased (14 days vs 10 days; p=0.051)                                               |                                                                                    |
| <b>2. Agitated behavior is not the presenting symptom</b> |            |                                                                                              |                                                                                                                                                                |                                                                                    |
| <i>Randomized controlled studies</i>                      |            |                                                                                              |                                                                                                                                                                |                                                                                    |
| Schneider 1999 <sup>41</sup><br>N=10                      | Amantadine | Neurobehavioral rating scale                                                                 | No significant difference in behavior scores between amantadine and placebo groups                                                                             | No safety outcomes reported                                                        |
| Meythaler 2001 <sup>40</sup><br>N=9                       | Sertraline | Agitated Behavior Scale                                                                      | No difference in decline of ABS over treatment period                                                                                                          | No safety outcomes reported                                                        |
| Meythaler 2002 <sup>42</sup><br>N=35                      | Amantadine | Agitated Behavior Scale                                                                      | There were no statistically significant changes or trends in the ABS during the first 6 weeks or the second 6 weeks of the study (P> .05, Mann–Whitney U test) | No detrimental effects in hematology or biochemistry laboratories and no seizures. |
| Banos 2010 <sup>38</sup><br>N=99                          | Sertraline | Aggression self-report and family report according to the Neurobehavioral Function Inventory | No significant differences between sertraline and placebo in patient self-report and family report.                                                            | No safety outcomes reported                                                        |
| Giacino 2012 <sup>39</sup><br>N=184                       | Amantadine | Agitation and restlessness not                                                               | A total of 12/87 (14%) patients and 11/97 (11%) patients exposed to amantadine and placebo                                                                     | No differences in adverse events (seizure, nausea, vomiting,                       |



|                                                             |                   |                                                                                 |                                                                                                                                                                |                                                                                                                                                       |
|-------------------------------------------------------------|-------------------|---------------------------------------------------------------------------------|----------------------------------------------------------------------------------------------------------------------------------------------------------------|-------------------------------------------------------------------------------------------------------------------------------------------------------|
|                                                             |                   | further defined                                                                 | developed agitation (p=NS) over the 4-week period. Restlessness was reported in 8% and 9% of patients exposed to amantadine and placebo, respectively.         | constipation, diarrhea, elevated liver function tests, insomnia, rash, congestive heart failure, involuntary muscle contractions)                     |
| Tramontana 2014<br>N=22 but 13 patients completed the study | Lisdexamphetamine | Agitation and restlessness not further defined                                  | No difference in agitation (no cases in each group) or irritability (1/13 case) during placebo) between the Lisdexamphetamine and placebo groups.              | Reduced appetite and weight loss of more than 5 lbs more frequent with lisdexamphetamine (7 vs 1 case) p=NS                                           |
| Johansson 2014<br>N=48                                      | Methylphenidate   | Aggression, restlessness and irritability not further defined                   | No difference in aggression, restlessness and irritability in patients treated with methylphenidate                                                            | A significant increase in heart rate was found. No significant changes were found in blood pressure or QT intervals.                                  |
| Fann 2017<br>N=62                                           | Sertraline        | Brief Anger and Aggression Scale and agitation/restlessness not further defined | No difference in the Anger and Aggression Scale. More patients developed agitation/restlessness in the sertraline group (17%) vs the placebo group (7%) p=0.42 | No significant difference in safety outcomes. More patients in the sertraline group (17%) developed gas/flatulence vs the placebo group (0%) p=0.052. |
| Hart 2017                                                   | Dextroamphetamine | Agitated Behavior                                                               | Increase in agitation with dextroamphetamine over                                                                                                              | No significant difference in heart                                                                                                                    |

1  
2  
3  
4  
5  
6  
7  
8  
9  
10  
11  
12  
13  
14  
15  
16  
17  
18  
19  
20  
21  
22  
23  
24  
25  
26  
27  
28  
29  
30  
31  
32  
33  
34  
35  
36  
37  
38  
39  
40  
41  
42  
43  
44  
45  
46  
47

|      |      |       |                                   |                         |
|------|------|-------|-----------------------------------|-------------------------|
| N=32 | mine | Scale | time compared to placebo (p<0.05) | rate or blood pressure. |
|------|------|-------|-----------------------------------|-------------------------|

For peer review only

1  
2  
3 282 agitated behavior scores (ABS) evaluated by family members at eight weeks (12.9 vs  
4  
5 283 15.5 points;  $p=0.03$ ) was observed. Finally, a crossover study assessed  
6  
7 284 methylphenidate for anger ( $n=38$ ) in TBI rehabilitation center outpatients (six months or  
8  
9  
10 285 more after TBI). After six weeks, methylphenidate significantly reduced the anger score  
11  
12 286 using the State Trait Anger Scale (STAS).<sup>32</sup>

13  
14 287  
15  
16  
17 288 Of the eight studies, safety outcomes were reported in four studies.<sup>32-35</sup> When reported,  
18  
19 289 the agents studied were well tolerated with no significant differences observed.  
20  
21 290 Functional and cognitive outcomes were not reported in any of these studies.  
22  
23

24 291  
25  
26 292 *Agitated behavior as a secondary measure*  
27  
28 293  
29 294 We identified nine studies evaluating agitated behaviors as a secondary measure, which  
30  
31 295 were focused on cognitive function and neurological recovery (Table 1).<sup>39-47</sup> In these  
32  
33 296 studies, sertraline<sup>39, 41, 45</sup>, amantadine<sup>40, 42, 43</sup>, amphetamines<sup>44, 47</sup>, and methylphenidate<sup>46</sup>  
34  
35 297 were evaluated versus placebo and reported agitated behaviors as an outcome. Of  
36  
37 298 these studies, 6 used a randomized crossover design and 3 used a randomized  
38  
39 299 controlled parallel design.  
40  
41  
42  
43

44 300  
45  
46 301 Sertraline was evaluated in three studies to enhance recovery and increase arousal,  
47  
48 302 ameliorate cognitive and neurobehavioral functioning and to treat major depression  
49  
50 303 (Table 3).<sup>39, 41, 45</sup> In all these three studies, sertraline had no effect on the incidence of  
51  
52 304 agitation, anger or aggression. In one study, more patients developed  
53  
54 305 agitation/restlessness in the sertraline group (17%) compared to the placebo group (7%)  
55  
56  
57  
58  
59  
60

1  
2  
3 306 but this difference was not statistically significant ( $p=0.42$ ).<sup>45</sup> Amantadine was also  
4  
5 307 evaluated in three studies for cognitive and functional recovery.<sup>40, 42, 43</sup> All three studies  
6  
7 308 found no differences in agitated behaviors compared to placebo. Methylphenidate was  
8  
9  
10 309 evaluated for secondary mental fatigue in mild TBI patients more than six months after  
11  
12 310 injury.<sup>46</sup> However, it had no effect on irritability and aggression. Lisdexamphetamine and  
13  
14 311 dextroamphetamine were each evaluated for attention deficits in TBI patients and no  
15  
16 312 effect on agitated behaviors was noted with lisdexamphetamine whereas  
17  
18 313 dextroamphetamine increased agitation over time ( $p<0.05$ ).<sup>44, 47</sup> Among these 9 studies,  
19  
20 314 those evaluating sertraline and amantadine reported no significant differences in  
21  
22 315 adverse events.<sup>39-43, 45</sup>  
23  
24  
25  
26  
27

### 28 317 *Studies evaluating safety outcomes*

29  
30  
31 318 Finally, the safety of pharmacological agents used for agitated behaviors in TBI patients  
32  
33 319 was evaluated in four retrospective observational studies (Table 4).<sup>48-51</sup> Two of these  
34  
35 320 studies focused on the effect of haloperidol and antipsychotic use on post-traumatic  
36  
37 321 amnesia (PTA) duration, whereas a third evaluated the effects of antipsychotics,  
38  
39 322 benzodiazepines and narcotics on PTA duration, and Functional independence measure  
40  
41 323 (FIM) cognitive and motor scores.<sup>49-51</sup> In these three studies, haloperidol and other  
42  
43 324 antipsychotics were associated with an increase in PTA duration. Antipsychotics,  
44  
45 325 benzodiazepines and narcotics had no effects on FIM scores.<sup>49</sup> Finally a fourth study  
46  
47 326 focused on the general safety (seizures, neuroleptic malignant syndrome, QTc  
48  
49 327 prolongation, extrapyramidal symptoms, hematologic disturbances) of haloperidol in ICU  
50  
51 328 TBI patients.<sup>48</sup> Patients exposed to haloperidol ( $n=45$ ) had no significant increase in  
52  
53 329 adverse events compared to non-exposed patients ( $n=56$ ). Of note, none of the studies  
54  
55  
56  
57  
58  
59  
60

1  
2  
3 330 adjusted for severity of TBI and other potential confounders.  
4

5 331  
6

7  
8 332 *Risk of bias assessment*

9  
10 333 Risk of bias scores are reported in Table 5. The analysis of risk of bias of randomized

11  
12 334 controlled trials with the Cochrane Collaboration's Tool revealed that many studies did

13  
14 335 not provide sufficient information on sequence, generation and allocation concealment.

15  
16 336 A majority of studies had other threats to validity including limited sample sizes, no

17  
18 337 description of patient demographics and loss to follow-up. For six studies evaluated with

19  
20 338 the Newcastle-Ottawa tool, the number of stars awarded ranged from four to five. Most

21  
22 339 studies were awarded a score of four stars, indicating a high risk of bias. As none of the

23  
24 340 six studies were adjusted for potential confounding, all received 0 stars for comparability.

25  
26 341  
27

28  
29 342  
30

31  
32 343  
33

34  
35 344  
36

37  
38 345  
39

40  
41 346  
42

43  
44 347  
45

46  
47 348  
48  
49  
50  
51  
52  
53  
54  
55  
56  
57  
58  
59  
60

349 **Table 4 - Studies assessing the safety of pharmacological agents used for agitated behaviors in TBI**

| Study/Year/n           | Drugs studied                                     | Results                                                                                                                                                                                                                                                                                                                                                                                                                                                                                            |
|------------------------|---------------------------------------------------|----------------------------------------------------------------------------------------------------------------------------------------------------------------------------------------------------------------------------------------------------------------------------------------------------------------------------------------------------------------------------------------------------------------------------------------------------------------------------------------------------|
| Rao 1985<br>N=26       | Haloperidol                                       | Twenty-five patients exhibited agitation and 11 patients required haloperidol. In an unadjusted analysis, the haloperidol patients have a significantly longer period (8 vs 4 weeks; p<0.03) of post-traumatic amnesia (PTA).                                                                                                                                                                                                                                                                      |
| Mysiw<br>2006<br>N=182 | Narcotics,<br>benzodiazepines and<br>neuroleptics | Narcotics, benzodiazepines and neuroleptics had no effect on the Function Independence Measures (FIM) motor and independence scores. In an unadjusted analysis, narcotics and neuroleptics increased duration of PTA by more than 7 days (p<0.01).                                                                                                                                                                                                                                                 |
| Kooda<br>2015<br>N=195 | Antipsychotics                                    | Fifty-two patients received antipsychotics (26.7%) within 7 days of TBI, mostly quetiapine. In an unadjusted analysis, duration of PTA was significantly longer (19.6 vs 12.3 days; p=0.013) in patients treated with antipsychotics.                                                                                                                                                                                                                                                              |
| Anderson 2016<br>N=101 | Haloperidol                                       | In an unadjusted analysis, there was no significant increase in adverse events (QT prolongation, seizures, neuroleptic malignant syndrome, extrapyramidal symptoms, or hematologic disturbances) associated with haloperidol use. Patients in the haloperidol group who developed complications received a higher mean daily dose [p = 0.013]. There was no difference in length of mechanical ventilation but the haloperidol group had a longer hospital length of stay (22 vs 11 days; p<0.001) |

350

351 **Table 5 – Risk of bias assessment**

352

|                                        |
|----------------------------------------|
| <b>1. Randomized controlled trials</b> |
|----------------------------------------|

|                | Cochrane Collaboration Tool Risk of bias items |            |                                        |                                |              |                     |                           |
|----------------|------------------------------------------------|------------|----------------------------------------|--------------------------------|--------------|---------------------|---------------------------|
| Study (year)   | Sequence generation                            | Allocation | Blinding of participants and personnel | Blinding of outcome assessment | Outcome data | Selective reporting | Other threats to validity |
| Brooke 1992    | U                                              | U          | L                                      | L                              | L            | L                   | H                         |
| Mooney 1993    | U                                              | U          | L                                      | H                              | L            | U                   | H                         |
| Schneider 1999 | U                                              | U          | U                                      | U                              | H            | L                   | H                         |
| Meythaler 2001 | U                                              | U          | L                                      | L                              | U            | U                   | H                         |
| Meythaler 2002 | U                                              | U          | U                                      | U                              | L            | H                   | H                         |
| Banos 2010     | U                                              | U          | L                                      | L                              | L            | L                   | H                         |
| Yablon 2010    | U                                              | U          | L                                      | L                              | L            | U                   | H                         |
| Giacino 2012   | U                                              | L          | L                                      | L                              | L            | L                   | L                         |

1  
2  
3  
4  
5  
6  
7  
8  
9  
10  
11  
12  
13  
14  
15  
16  
17  
18  
19  
20  
21  
22  
23  
24  
25  
26  
27  
28  
29  
30  
31  
32  
33  
34  
35  
36  
37  
38  
39  
40  
41  
42  
43  
44  
45  
46  
47

|                 |   |   |   |   |   |   |   |
|-----------------|---|---|---|---|---|---|---|
| Hammond 2014    | L | L | L | L | U | L | L |
| Tramontana 2014 | H | H | L | L | H | L | H |
| Johansson 2014  | U | H | H | H | H | L | H |
| Beresford 2015  | U | U | L | L | H | L | H |
| Hammond 2015    | L | L | L | L | U | L | L |
| Fann 2017       | L | L | L | L | L | L | H |
| Hart 2017       | U | U | L | L | L | L | L |

**2. Observational studies**

|              |                                           |  |                            |  |                      |  |
|--------------|-------------------------------------------|--|----------------------------|--|----------------------|--|
| Study (year) | Newcastle-Ottawa Quality Assessment Scale |  |                            |  |                      |  |
|              | Number of stars awarded                   |  |                            |  |                      |  |
|              | Selection <sup>a</sup>                    |  | Comparability <sup>b</sup> |  | Outcome <sup>c</sup> |  |
| Rao 1985     | **                                        |  |                            |  | **                   |  |



|                          |     |  |     |
|--------------------------|-----|--|-----|
| Maturana Waidele<br>2009 | **  |  | **  |
| Mysiw 2006               | **  |  | *** |
| Kooda 2015               | **  |  | **  |
| Anderson 2016            | **  |  | **  |
| Gramish 2017             | *** |  | *   |

353 For Cochrane Collaboration's Tool:

354 H, high risk of bias; L, low risk of bias; U, unclear risk of bias

355

356 For Newcastle-Ottawa Quality Assessment Scale :

357 <sup>a</sup> Maximum 4 stars

358 <sup>b</sup> Maximum 2 stars

359 <sup>c</sup> Maximum 3 stars.

360 N/A : not applicable

## 361 Discussion

362 In this systematic review, we used an exhaustive search strategy and included studies  
363 directly or indirectly evaluating pharmacological agents for the management of TBI-  
364 associated agitated behaviors as well as studies assessing the safety of  
365 pharmacological agents used for these agitated behaviors. Despite the prevalence and  
366 importance of this problem, we found a limited number of studies evaluating  
367 pharmacological interventions for the management of agitated behaviors. Propranolol,  
368 methylphenidate, valproic acid and olanzapine were the only agents suggesting a  
369 potential benefit in reducing agitation, anger or irritability.<sup>31, 32, 37, 38</sup> However, the studies  
370 evaluating these agents had limited sample sizes, heterogeneous patient populations  
371 and an unclear risk of bias. Amantadine showed mixed results whereas sertraline,  
372 lysdexamphetamine and dextroamphetamine showed no benefits. In comparison to the  
373 two most recent systematic reviews, we used a more rigorous and broader search  
374 strategy. As such, we restricted our search to randomized controlled, quasi-  
375 experimental, and observational studies with control groups that had a majority (>50%)  
376 of patients with TBI, thus excluding case reports, case series and uncontrolled  
377 observational studies. Our updated and broadened literature search enabled the  
378 identification of two additional studies from the grey literature, three recently published  
379 studies and one non-English study.<sup>24, 25, 33, 36, 37, 45, 47</sup> Our search strategy also included  
380 studies evaluating agitated behaviors as a secondary measure and identified 9 more  
381 studies, thus adding to previous systematic reviews. Furthermore, we included studies  
382 where the safety of pharmacological agents for the management of agitated behaviors  
383 was assessed and identified four such studies.

384

1  
2  
3 385 The use of beta-blockers in patients with organic brain disease and assaultive behaviors  
4  
5 386 or impulsivity has been previously studied in three crossover-randomized trials with  
6  
7 387 some efficacy but TBI represented less than 50% of the total patient population.<sup>62-64</sup> In  
8  
9 388 the study presented in this review, propranolol reduced the intensity of agitation but not  
10  
11 389 the frequency.<sup>31</sup> One important finding was a reduction in the use of physical restraints.  
12  
13 390 Unfortunately, safety measures such as hypotension and bradycardia were not reported.  
14  
15 391 The Canadian ABIKUS guidelines have recommended beta-blockers for the treatment of  
16  
17 392 aggression following TBI.<sup>66</sup>  
18  
19 393 Although numerous observational studies have reported a reduction in agitation with the  
20  
21 394 use of antipsychotic agents, we found no controlled studies evaluating the efficacy of  
22  
23 395 antipsychotics other than olanzapine.<sup>67-69</sup> In a previous systematic review that included  
24  
25 396 case reports and case series evaluating antipsychotics, Lanthier et al. identified 7  
26  
27 397 articles that included a total of 52 patients.<sup>24</sup> The lack of a control group excluded these  
28  
29 398 studies from our review. The only study we included that used olanzapine didn't report a  
30  
31 399 reduction in restlessness but did suggest a reduction in irritability.<sup>38</sup> Its interpretation is  
32  
33 400 greatly limited given the poor description of methods and a lack of statistical comparison  
34  
35 401 with the placebo group. The four studies assessing safety all evaluated antipsychotic  
36  
37 402 agents and suggested a potential risk of prolonged PTA in unadjusted analyses.<sup>48-51</sup>  
38  
39 403 None of the studies controlled for potential confounders such as severity of TBI.  
40  
41 404 Although pre-clinical studies have suggested a reduction in cognitive and motor recovery  
42  
43 405 with repeated administration of haloperidol and risperidone, the one study evaluating  
44  
45 406 cognitive and motor scores reported no significant association with antipsychotic use.<sup>19-</sup>  
46  
47 407 <sup>21, 49, 70</sup> In light of these results, both the International Cognitive (INCOG), the Canadian  
48  
49 408 ABIKUS guidelines and the French Society of Physical and Rehabilitation Medicine  
50  
51  
52  
53  
54  
55  
56  
57  
58  
59  
60

1  
2  
3 409 (SOFMER) guidelines have advised against the use of antipsychotics in TBI patients  
4  
5 410 with agitated behaviors.<sup>24, 66, 71</sup> Paradoxically, observational studies have suggested  
6  
7 411 antipsychotics are frequently used for the management of agitated behaviors.<sup>14, 72-74</sup>  
8  
9

10 412  
11  
12 413 Anticonvulsants are clinically used as mood stabilizers in bipolar affective disorder and  
13  
14 414 have also been used in TBI-associated agitation.<sup>75, 76</sup> Case series have reported a  
15  
16 415 reduction in agitation and aggressive behaviors with the use of valproic acid and  
17  
18 416 carbamazepine but were uncontrolled.<sup>77-81</sup> We identified one unpublished study of TBI  
19  
20 417 patients with affective lability and alcohol dependence where valproic acid showed  
21  
22 418 effectiveness in reducing weekly ABS rated by spouse or significant other's.  
23  
24 419 Unfortunately, the abstract provided no information on the onset of effect or adverse  
25  
26 420 events associated with its use.  
27  
28  
29

30 421  
31  
32  
33 422 Amantadine increases dopaminergic neurotransmission and has been shown to  
34  
35 423 increase the rate of neurological recovery in severe TBI.<sup>40</sup> In the 4 studies that evaluated  
36  
37 424 amantadine for irritability, agitation or aggressiveness, results were variable.<sup>33-36</sup>  
38  
39 425 Although one study suggested a reduction in irritability in outpatients, a larger study by  
40  
41 426 the same group failed to confirm these results.<sup>34, 35</sup> Interestingly, a recent observational  
42  
43 427 study of patients exposed to amantadine in the ICU reported an increased risk of  
44  
45 428 agitation.<sup>36</sup> Although these effects were not observed in a multicenter trial that started  
46  
47 429 amantadine at least four weeks after TBI, the early use of amantadine in the ICU may  
48  
49 430 explain these findings.<sup>36, 40</sup> However, these results were uncontrolled and confounding  
50  
51 431 may also explain these differences. In addition, the use of amantadine may have  
52  
53 432 increased arousal and the agitation measured may be part of the natural recovery. In  
54  
55  
56  
57  
58  
59

1  
2  
3 433 studies in which agitation was not the presenting symptom, no significant differences in  
4  
5 434 behavior scores between amantadine and control groups were reported.<sup>40, 42, 43</sup>  
6  
7  
8 435

9  
10 436 In this review, we found no comparative studies assessing the efficacy of tricyclic  
11  
12 437 antidepressants, dexmedetomidine or benzodiazepines. We also found no studies in  
13  
14 438 children. A search of TBI-associated agitation studies in clinical trial registries revealed  
15  
16 439 ongoing studies with the combination of dextromethorphan and quinidine  
17  
18 440 (ClinicalTrials.gov: NCT03095066) as well as propranolol and clonidine  
19  
20 441 (ClinicalTrials.gov: NCT01322048).<sup>82</sup> Finally, in a recent observational study on the  
21  
22 442 predictors of agitation in TBI rehabilitation, sodium channel antagonist anticonvulsants,  
23  
24 443 second-generation antipsychotics, and gamma-aminobutyric acid anxiolytics were  
25  
26 444 associated with more severe agitation.<sup>14</sup> Although indication bias and residual  
27  
28 445 confounding are probable, these results do suggest an association between suppression  
29  
30 446 of cognition and more agitation.  
31  
32  
33  
34  
35  
36  
37  
38  
39  
40  
41  
42  
43  
44  
45  
46  
47  
48  
49  
50  
51  
52  
53  
54  
55

56 447  
57 448 Strengths of this study include an exhaustive search of the literature in the adult and  
58  
59 449 pediatric populations, including grey literature and no language limitation. A risk of bias  
60 450 assessment was performed for each included study. Limits of this study include the  
451 presence of significant heterogeneity, variations in the different agitated behaviors  
452 (agitation, irritability, and aggression) and populations (acute TBI, rehabilitation,  
453 outpatient) evaluated, preventing the authors from proceeding to a meta-analysis. In  
454 addition, very little studies reported length of stay and functional outcomes.

455

## 456 **Conclusion**

1  
2  
3 457 In conclusion, there are insufficient data to recommend the use of any medications for  
4  
5 458 the management of agitation following TBI. Propranolol, methylphenidate, valproic acid  
6  
7 459 and olanzapine may offer some benefit, however, they need to be further studied. The  
8  
9 460 use of amantadine in the acutely ill may increase the risk of agitation whereas  
10  
11 461 antipsychotics may prolong post-traumatic amnesia. More studies on tailored  
12  
13 462 interventions and continuous evaluation throughout the acute, rehabilitation and  
14  
15 463 outpatient settings are needed to assess the efficacy and safety of pharmacological  
16  
17 464 agents for the management of agitated behaviours in both the adult and pediatric TBI  
18  
19 465 populations. In addition, there is a need to better define and standardize the assessment  
20  
21 466 of agitated behaviors. Newer agents such as dexmedetomidine should also be  
22  
23 467 evaluated.  
24  
25  
26  
27  
28  
29

### 30 469 **Acknowledgements**

31  
32  
33 470 We thank M. Patrice Dupont, librarian at the Université de Montréal for his  
34  
35 471 expertise and help with the literature search strategies.  
36

### 37 472 **Figure 1: Prisma Flow Diagram**

### 38 473 **References**

- 39  
40  
41  
42 474 1. Rubiano AM, Carney N, Chesnut R, Puyana JC. Global neurotrauma research  
43 475 challenges and opportunities. *Nature* 2015;527:S193-197.  
44 476 2. Corrigan JD, Selassie AW, Orman JA. The epidemiology of traumatic brain injury. *J*  
45 477 *Head Trauma Rehabil* 2010;25:72-80.  
46 478 3. Chen A, Bushmeneva K, Zagorski B, Colantonio A, Parsons D, Wodchis WP. Direct cost  
47 479 associated with acquired brain injury in Ontario. *BMC neurology* 2012;12:76.  
48 480 4. Tuominen R, Joelsson P, Tenovuo O. Treatment costs and productivity losses caused  
49 481 by traumatic brain injuries. *Brain Inj* 2012;26:1697-1701.  
50 482 5. Ciurli P, Formisano R, Bivona U, Cantagallo A, Angelelli P. Neuropsychiatric disorders  
51 483 in persons with severe traumatic brain injury: prevalence, phenomenology, and  
52 484 relationship with demographic, clinical, and functional features. *J Head Trauma Rehabil*  
53 485 2011;26:116-126.  
54  
55  
56  
57  
58  
59

- 1  
2  
3 486 6. van der Naalt J, van Zomeren AH, Sluiter WJ, Minderhoud JM. Acute behavioural  
4 487 disturbances related to imaging studies and outcome in mild-to-moderate head injury.  
5 488 *Brain Inj* 2000;14:781-788.
- 6 489 7. Sandel ME, Mysiw WJ. The agitated brain injured patient. Part 1: Definitions,  
7 490 differential diagnosis, and assessment. *Archives of physical medicine and rehabilitation*  
8 491 1996;77:617-623.
- 9 492 8. Kadyan V, Mysiw WJ, Bogner JA, Corrigan JD, Fugate LP, Clinchot DM. Gender  
10 493 differences in agitation after traumatic brain injury. *American journal of physical medicine*  
11 494 & rehabilitation / Association of Academic Physiatrists 2004;83:747-752.
- 12 495 9. Weir N, Doig EJ, Fleming JM, Wiemers A, Zemljic C. Objective and behavioural  
13 496 assessment of the emergence from post-traumatic amnesia (PTA). *Brain Inj* 2006;20:927-  
14 497 935.
- 15 498 10. Singh R, Venkateshwara G, Nair KP, Khan M, Saad R. Agitation after traumatic brain  
16 499 injury and predictors of outcome. *Brain Inj* 2014;28:336-340.
- 17 500 11. Nott MT, Chapparo C, Baguley IJ. Agitation following traumatic brain injury: an  
18 501 Australian sample. *Brain Inj* 2006;20:1175-1182.
- 19 502 12. Bogner JA, Corrigan JD, Fugate L, Mysiw WJ, Clinchot D. Role of agitation in  
20 503 prediction of outcomes after traumatic brain injury. *American journal of physical medicine*  
21 504 & rehabilitation / Association of Academic Physiatrists 2001;80:636-644.
- 22 505 13. Wolffbrandt MM, Poulsen I, Engberg AW, Hornnes N. Occurrence and severity of  
23 506 agitated behavior after severe traumatic brain injury. *Rehabil Nurs* 2013;38:133-141.
- 24 507 14. Bogner J, Barrett RS, Hammond FM, et al. Predictors of Agitated Behavior During  
25 508 Inpatient Rehabilitation for Traumatic Brain Injury. *Archives of physical medicine and*  
26 509 *rehabilitation* 2015;96:S274-S281 e274.
- 27 510 15. McNett M, Sarver W, Wilczewski P. The prevalence, treatment and outcomes of  
28 511 agitation among patients with brain injury admitted to acute care units. *Brain Inj*  
29 512 2012;26:1155-1162.
- 30 513 16. Brooke MM, Questad KA, Patterson DR, Bashak KJ. Agitation and restlessness after  
31 514 closed head injury: a prospective study of 100 consecutive admissions. *Archives of physical*  
32 515 *medicine and rehabilitation* 1992;73:320-323.
- 33 516 17. Hammond FM, Barrett RS, Shea T, et al. Psychotropic Medication Use During  
34 517 Inpatient Rehabilitation for Traumatic Brain Injury. *Archives of physical medicine and*  
35 518 *rehabilitation* 2015;96:S256-S273 e214.
- 36 519 18. Williamson DR, Frenette AJ, Burry L, et al. Pharmacological interventions for  
37 520 agitation in patients with traumatic brain injury. *Crit Care* 2018;22(Suppl 1):P376.
- 38 521 19. Hoffman AN, Cheng JP, Zafonte RD, Kline AE. Administration of haloperidol and  
39 522 risperidone after neurobehavioral testing hinders the recovery of traumatic brain injury-  
40 523 induced deficits. *Life sciences* 2008;83:602-607.
- 41 524 20. Kline AE, Hoffman AN, Cheng JP, Zafonte RD, Massucci JL. Chronic administration of  
42 525 antipsychotics impede behavioral recovery after experimental traumatic brain injury.  
43 526 *Neuroscience letters* 2008;448:263-267.
- 44 527 21. Kline AE, Massucci JL, Zafonte RD, Dixon CE, DeFeo JR, Rogers EH. Differential effects  
45 528 of single versus multiple administrations of haloperidol and risperidone on functional  
46 529 outcome after experimental brain trauma. *Crit Care Med* 2007;35:919-924.



- 1  
2  
3 530 22. Phelps TI, Bondi CO, Ahmed RH, Olugbade YT, Kline AE. Divergent long-term  
4 531 consequences of chronic treatment with haloperidol, risperidone, and bromocriptine on  
5 532 traumatic brain injury-induced cognitive deficits. *Journal of neurotrauma* 2015;32:590-597.  
6 533 23. Fleminger S, Greenwood RJ, Oliver DL. Pharmacological management for agitation  
7 534 and aggression in people with acquired brain injury. *The Cochrane database of systematic*  
8 535 *reviews* 2006:CD003299.  
9  
10 536 24. Plantier D, Luaute J, group S. Drugs for behavior disorders after traumatic brain  
11 537 injury: Systematic review and expert consensus leading to French recommendations for  
12 538 good practice. *Ann Phys Rehabil Med* 2016;59:42-57.  
13 539 25. Mehta S, McIntyre A, Janzen S, Iruthayarajah J, Bateman A, Teasell R.  
14 540 Pharmacological management of agitation among individuals with moderate to severe  
15 541 acquired brain injury: A systematic review. *Brain Inj* 2018;32:287-296.  
16 542 26. Williamson DR, Frenette AJ, Burry L, et al. Pharmacological interventions for  
17 543 agitation in patients with traumatic brain injury: protocol for a systematic review and meta-  
18 544 analysis. *Syst Rev* 2016;5:193.  
19 545 27. Moher D, Liberati A, Tetzlaff J, Altman DG, Group P. Preferred reporting items for  
20 546 systematic reviews and meta-analyses: the PRISMA Statement. *Open Med* 2009;3:e123-130.  
21 547 28. McGowan J, Sampson M, Salzwedel DM, Cogo E, Foerster V, Lefebvre C. PRESS Peer  
22 548 Review of Electronic Search Strategies: 2015 Guideline Statement. *Journal of clinical*  
23 549 *epidemiology* 2016;75:40-46.  
24 550 29. Higgins JP, Altman DG, Gotzsche PC, et al. The Cochrane Collaboration's tool for  
25 551 assessing risk of bias in randomised trials. *Bmj* 2011;343:d5928.  
26 552 30. Wells G, Shea B, O'Connell D, et al. The Newcastle-Ottawa Scale (NOS) for assessing  
27 553 the quality of nonrandomised studies in meta-analyses.  
28 554 [http://www.ohri.ca/programs/clinical\\_epidemiology/oxford.asp](http://www.ohri.ca/programs/clinical_epidemiology/oxford.asp). 2013.  
29 555 31. Brooke MM, Patterson DR, Questad KA, Cardenas D, Farrel-Roberts L. The treatment  
30 556 of agitation during initial hospitalization after traumatic brain injury. *Archives of physical*  
31 557 *medicine and rehabilitation* 1992;73:917-921.  
32 558 32. Mooney GF, Haas LJ. Effect of methylphenidate on brain injury-related anger.  
33 559 *Archives of physical medicine and rehabilitation* 1993;74:153-160.  
34 560 33. Yablon S, Sherer M, Nakase-Richardson R, N T. Amantadine Hydrochloride for  
35 561 Treatment of Symptoms of the  
36 562 Posttraumatic Confusional State: A Randomized, Double-Blind,  
37 563 Placebo-Controlled Trial. *Archives of physical medicine and rehabilitation* 2010;91:E3.  
38 564 34. Hammond FM, Sherer M, Malec JF, et al. Amantadine Effect on Perceptions of  
39 565 Irritability after Traumatic Brain Injury: Results of the Amantadine Irritability Multisite  
40 566 Study. *Journal of neurotrauma* 2015;32:1230-1238.  
41 567 35. Hammond FM, Bickett AK, Norton JH, Pershad R. Effectiveness of amantadine  
42 568 hydrochloride in the reduction of chronic traumatic brain injury irritability and aggression.  
43 569 *J Head Trauma Rehabil* 2014;29:391-399.  
44 570 36. Gramish JA, Kopp BJ, Patanwala AE. Effect of Amantadine on Agitation in Critically Ill  
45 571 Patients With Traumatic Brain Injury. *Clin Neuropharmacol* 2017;40:212-216.  
46 572 37. Beresford T, Schmidt BK, Buchanan J, et al. A double-blind trial of divalproex sodium  
47 573 for affective lability and ethanol use following traumatic brain injury. *APA abstracts* 2015.



- 1  
2  
3 574 38. Maturana Waidele R, Maturana Rodillo R. Control de la agresividad con olanzapina  
4 575 en pacientes post tec / Aggressiveness control using olanzapine in post tbi patients Cienc  
5 576 Trab 2009;31:22-24.
- 6 577 39. Banos JH, Novack TA, Brunner R, Renfroe S, Lin HY, Meythaler J. Impact of early  
7 578 administration of sertraline on cognitive and behavioral recovery in the first year after  
8 579 moderate to severe traumatic brain injury. *J Head Trauma Rehabil* 2010;25:357-361.
- 9 580 40. Giacino JT, Whyte J, Bagiella E, et al. Placebo-controlled trial of amantadine for  
10 581 severe traumatic brain injury. *N Engl J Med* 2012;366:819-826.
- 11 582 41. Meythaler JM, Depalma L, Devivo MJ, Guin-Renfroe S, Novack TA. Sertraline to  
12 583 improve arousal and alertness in severe traumatic brain injury secondary to motor vehicle  
13 584 crashes. *Brain Inj* 2001;15:321-331.
- 14 585 42. Schneider WN, Drew-Cates J, Wong TM, Dombovy ML. Cognitive and behavioural  
15 586 efficacy of amantadine in acute traumatic brain injury: an initial double-blind placebo-  
16 587 controlled study. *Brain Inj* 1999;13:863-872.
- 17 588 43. Meythaler JM, Brunner RC, Johnson A, Novack TA. Amantadine to improve  
18 589 neurorecovery in traumatic brain injury-associated diffuse axonal injury: a pilot double-  
19 590 blind randomized trial. *J Head Trauma Rehabil* 2002;17:300-313.
- 20 591 44. Tramontana MG, Cowan RL, Zald D, Prokop JW, Guillaumondegui O. Traumatic brain  
21 592 injury-related attention deficits: treatment outcomes with lisdexamfetamine dimesylate  
22 593 (Vyvanse). *Brain Inj* 2014;28:1461-1472.
- 23 594 45. Fann JR, Bombardier CH, Temkin N, et al. Sertraline for Major Depression During the  
24 595 Year Following Traumatic Brain Injury: A Randomized Controlled Trial. *J Head Trauma  
25 596 Rehabil* 2017;32:332-342.
- 26 597 46. Johansson B, Wentzel AP, Andrell P, Odenstedt J, Mannheimer C, Ronnback L.  
27 598 Evaluation of dosage, safety and effects of methylphenidate on post-traumatic brain injury  
28 599 symptoms with a focus on mental fatigue and pain. *Brain Inj* 2014;28:304-310.
- 29 600 47. Hart T, Whyte J, Watanabe T, Chervoneva I. Effects of dextroamphetamine in  
30 601 subacute traumatic brain injury: A randomized, placebo-controlled pilot study. *Journal of  
31 602 neuroscience research* 2017.
- 32 603 48. Anderson RL, Birrer KL, Liu-De Ryke X. Haloperidol Use in Acute Traumatic  
33 604 Brain Injury: A Safety Analysis. *Journal of Intensive and Critical Care* 2016;2:1-6.
- 34 605 49. Mysiw WJ, Bogner JA, Corrigan JD, Fugate LP, Clinchot DM, Kadyan V. The impact of  
35 606 acute care medications on rehabilitation outcome after traumatic brain injury. *Brain Inj*  
36 607 2006;20:905-911.
- 37 608 50. Rao N, Jellinek HM, Woolston DC. Agitation in closed head injury: haloperidol effects  
38 609 on rehabilitation outcome. *Archives of physical medicine and rehabilitation* 1985;66:30-34.
- 39 610 51. Kooda K, Aho J, Weber D, Berown A. The effect of antipsychotic use post-traumatic  
40 611 brain injury on duration of post-traumatic amnesia. *Crit Care Med* 2015;43:289.
- 41 612 52. Cummings JL, Mega M, Gray K, Rosenberg-Thompson S, Carusi DA, Gornbein J. The  
42 613 Neuropsychiatric Inventory: comprehensive assessment of psychopathology in dementia.  
43 614 *Neurology* 1994;44:2308-2314.
- 44 615 53. Corrigan JD. Development of a scale for assessment of agitation following traumatic  
45 616 brain injury. *J Clin Exp Neuropsychol* 1989;11:261-277.
- 46 617 54. Maiuro R, Vitaliano P, Cahn T. A brief measure for the assessment of anger and  
47 618 aggression. *J Interpersonal Violence* 1987;2:166-178.

- 1  
2  
3 619 55. Sherer M, Nakase-Thompson R, Yablon SA, Gontkovsky ST. Multidimensional  
4 620 assessment of acute confusion after traumatic brain injury. *Archives of physical medicine*  
5 621 and rehabilitation 2005;86:896-904.
- 6 622 56. Keith RA, Granger CV, Hamilton BB, Sherwin FS. The functional independence  
7 623 measure: a new tool for rehabilitation. *Adv Clin Rehabil* 1987;1:6-18.
- 8 624 57. Busner J, Targum SD. The clinical global impressions scale: applying a research tool  
9 625 in clinical practice. *Psychiatry (Edgmont)* 2007;4:28-37.
- 10 626 58. Katz M, Lyerly S. Methods of measuring adjustment and social behavior in the  
11 627 community: I. Rationale, description, discrimination validity and scale development. .  
12 628 *Psychol Rep* 1963;13:503-535.
- 13 629 59. Kreutzer J, Seel R, Marwitz J. *The Neurobehavioral Functioning*  
14 630 *Inventory*. : The Psychological Corporation. San Antonio, TX., 1999.
- 15 631 60. Levin HS, High WM, Goethe KE, et al. The neurobehavioural rating scale: assessment  
16 632 of the behavioural sequelae of head injury by the clinician. *J Neurol Neurosurg Psychiatry*  
17 633 1987;50:183-193.
- 18 634 61. Yudofsky SC, Silver JM, Jackson W, Endicott J, Williams D. The Overt Aggression Scale  
19 635 for the objective rating of verbal and physical aggression. *Am J Psychiatry* 1986;143:35-39.
- 20 636 62. Greendyke RM, Berkner JP, Webster JC, Gulya A. Treatment of behavioral problems  
21 637 with pindolol. *Psychosomatics* 1989;30:161-165.
- 22 638 63. Greendyke RM, Kanter DR. Therapeutic effects of pindolol on behavioral  
23 639 disturbances associated with organic brain disease: a double-blind study. *J Clin Psychiatry*  
24 640 1986;47:423-426.
- 25 641 64. Greendyke RM, Kanter DR, Schuster DB, Verstrete S, Wootton J. Propranolol  
26 642 treatment of assaultive patients with organic brain disease. A double-blind crossover,  
27 643 placebo-controlled study. *The Journal of nervous and mental disease* 1986;174:290-294.
- 28 644 65. Hammond FM, Malec JF, Zafonte RD, et al. Potential Impact of Amantadine on  
29 645 Aggression in Chronic Traumatic Brain Injury. *J Head Trauma Rehabil* 2017;32:308-318.
- 30 646 66. Acquired Brain Injury Knowledge Uptake Strategy (ABIKUS) guideline development  
31 647 group. Evidence based recommendations for rehabilitation of moderate to severe acquired  
32 648 brain injury. 2007. [http://www.abiebr.com/pdf/abikus\\_aug\\_07.pdf](http://www.abiebr.com/pdf/abikus_aug_07.pdf) [online].
- 33 649 67. Kim E, Bijlani M. A pilot study of quetiapine treatment of aggression due to traumatic  
34 650 brain injury. *The Journal of neuropsychiatry and clinical neurosciences* 2006;18:547-549.
- 35 651 68. Maryniak O, Manchanda R, Velani A. Methotrimeprazine in the treatment of agitation  
36 652 in acquired brain injury patients. *Brain Inj* 2001;15:167-174.
- 37 653 69. Stanislav SW, Childs A. Evaluating the usage of droperidol in acutely agitated persons  
38 654 with brain injury. *Brain Inj* 2000;14:261-265.
- 39 655 70. Wilson MS, Gibson CJ, Hamm RJ. Haloperidol, but not olanzapine, impairs cognitive  
40 656 performance after traumatic brain injury in rats. *American journal of physical medicine &*  
41 657 *rehabilitation / Association of Academic Physiatrists* 2003;82:871-879.
- 42 658 71. Ponsford J, Janzen S, McIntyre A, et al. INCOG recommendations for management of  
43 659 cognition following traumatic brain injury, part I: posttraumatic amnesia/delirium. *J Head*  
44 660 *Trauma Rehabil* 2014;29:307-320.
- 45 661 72. Pisa FE, Cosano G, Giangreco M, et al. Prescribing practice and off-label use of  
46 662 psychotropic medications in post-acute brain injury rehabilitation centres: a cross-sectional  
47 663 survey. *Brain Inj* 2015;29:508-516.

- 1  
2  
3 664 73. Fugate LP, Spacek LA, Kresty LA, Levy CE, Johnson JC, Mysiw WJ. Measurement and  
4 665 treatment of agitation following traumatic brain injury: II. A survey of the Brain Injury  
5 666 Special Interest Group of the American Academy of Physical Medicine and Rehabilitation.  
6 667 Archives of physical medicine and rehabilitation 1997;78:924-928.  
7  
8 668 74. Perreault M, Talic J, Frenette A, Burry L, Bernard F, Williamson D. Agitation after  
9 669 mild to moderate traumatic brain injury in the intensive care unit. Crit Care 2017;21 (Suppl  
10 670 1):P219.  
11 671 75. Chew E, Zafonte RD. Pharmacological management of neurobehavioral disorders  
12 672 following traumatic brain injury--a state-of-the-art review. Journal of rehabilitation  
13 673 research and development 2009;46:851-879.  
14 674 76. Deb S, Crownshaw T. The role of pharmacotherapy in the management of behaviour  
15 675 disorders in traumatic brain injury patients. Brain Inj 2004;18:1-31.  
16 676 77. Azouvi P, Jokic C, Attal N, Denys P, Markabi S, Bussel B. Carbamazepine in agitation  
17 677 and aggressive behaviour following severe closed-head injury: results of an open trial. Brain  
18 678 Inj 1999;13:797-804.  
19 679 78. Chatham Showalter PE, Kimmel DN. Agitated symptom response to divalproex  
20 680 following acute brain injury. The Journal of neuropsychiatry and clinical neurosciences  
21 681 2000;12:395-397.  
22 682 79. Chatham-Showalter PE. Carbamazepine for combativeness in acute traumatic brain  
23 683 injury. The Journal of neuropsychiatry and clinical neurosciences 1996;8:96-99.  
24 684 80. Wroblewski BA, Joseph AB, Kupfer J, Kalliel K. Effectiveness of valproic acid on  
25 685 destructive and aggressive behaviours in patients with acquired brain injury. Brain Inj  
26 686 1997;11:37-47.  
27 687 81. Kim E, Humaran TJ. Divalproex in the management of neuropsychiatric  
28 688 complications of remote acquired brain injury. The Journal of neuropsychiatry and clinical  
29 689 neurosciences 2002;14:202-205.  
30 690 82. Patel MB, McKenna JW, Alvarez JM, et al. Decreasing adrenergic or sympathetic  
31 691 hyperactivity after severe traumatic brain injury using propranolol and clonidine (DASH  
32 692 After TBI Study): study protocol for a randomized controlled trial. Trials 2012;13:177.  
33 693

### 694 **Contribution statement**

695 DRW, AJF, LB, MMP, EC, FL, MJP, JFG, SM and FB participated in the design, writing  
696 of the the review protocol and contributed to the final manuscript. DW wrote the search  
697 strategy and undertook the literature search. DW, AJF and FB conducted the title and  
698 abstract screening and full article screening for final study inclusion. DRW and AJF  
699 conducted data collection and cleaning, LB, MMP and EC advised on methods and  
700 interpretation of findings.

701

1  
2  
3 702  
4  
5 703  
6  
7  
8 704  
9  
10 705  
11  
12 706  
13  
14 707  
15  
16  
17 708  
18  
19 709  
20  
21 710  
22  
23  
24 711  
25  
26 712  
27  
28 713  
29  
30  
31  
32  
33  
34  
35  
36  
37  
38  
39  
40  
41  
42  
43  
44  
45  
46  
47  
48  
49  
50  
51  
52  
53  
54  
55  
56  
57  
58  
59  
60

For peer review only

1  
2  
3  
4  
5  
6  
7  
8  
9  
10  
11  
12  
13  
14  
15  
16  
17  
18  
19  
20  
21  
22  
23  
24  
25  
26  
27  
28  
29  
30  
31  
32  
33  
34  
35  
36  
37  
38  
39  
40  
41  
42  
43  
44  
45  
46  
47  
48  
49  
50  
51  
52  
53  
54  
55  
56  
57  
58  
59  
60

1 **PRISMA Flow Diagram**

2  
3

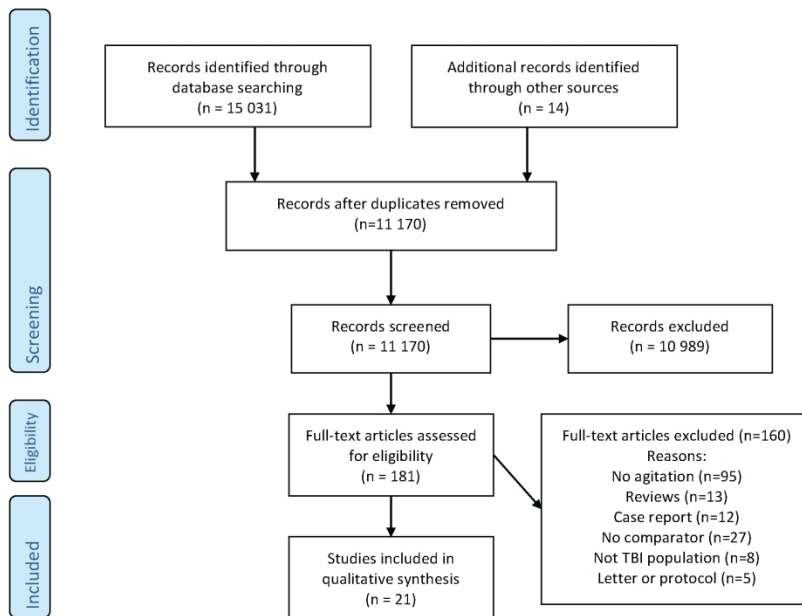

1

215x279mm (300 x 300 DPI)

## Supplementary file: search strategy in MedLine

| Concept | Description of concept    | Research terms                                                                                                                                                                                                                                                                                                                                                                                                                                                                                                                                                                                                                                                                                                                                                                                                                                                                                                                                                                                                                                                                                                                                                                                                                                                                                                                                                                                                                                                                                                                                                                                                                                                                                                                                                                                                                                                 |
|---------|---------------------------|----------------------------------------------------------------------------------------------------------------------------------------------------------------------------------------------------------------------------------------------------------------------------------------------------------------------------------------------------------------------------------------------------------------------------------------------------------------------------------------------------------------------------------------------------------------------------------------------------------------------------------------------------------------------------------------------------------------------------------------------------------------------------------------------------------------------------------------------------------------------------------------------------------------------------------------------------------------------------------------------------------------------------------------------------------------------------------------------------------------------------------------------------------------------------------------------------------------------------------------------------------------------------------------------------------------------------------------------------------------------------------------------------------------------------------------------------------------------------------------------------------------------------------------------------------------------------------------------------------------------------------------------------------------------------------------------------------------------------------------------------------------------------------------------------------------------------------------------------------------|
| A       | Agitation/delirium        | Confusion/ OR Delirium/ OR Psychomotor agitation/ OR attention/ OR hallucinations/ or hallucinat\$.mp OR delirium.mp OR confusion.mp OR Disorientation.mp OR agitation.mp OR confusional.mp OR Restlessness.mp OR Psychomotor Hyperactivity.mp OR Psychomotor Excite\$.mp OR Akathisia.mp OR attention.mp                                                                                                                                                                                                                                                                                                                                                                                                                                                                                                                                                                                                                                                                                                                                                                                                                                                                                                                                                                                                                                                                                                                                                                                                                                                                                                                                                                                                                                                                                                                                                      |
| B       | Traumatic brain injury    | Craniocerebral Trauma/ OR Craniocerebral Traumas.mp OR Craniocerebral Trauma.mp OR Craniocerebral injury.mp OR Craniocerebral injuries.mp OR Head Injury.mp OR Head Injuries.mp OR head trauma.mp OR head traumas.mp OR Parietal Region Trauma.mp OR Parietal Region Traumas.mp OR Skull Injury.mp OR Skull Injuries.mp OR Head Injury.mp OR Head Injuries.mp OR Occipital Region Trauma.mp OR Occipital Region Traumas.mp OR Occipital Trauma.mp OR Occipital Traumas.mp OR Temporal Region Trauma.mp OR Temporal Region Traumas.mp OR Frontal Region Trauma.mp OR Frontal Region Traumas.mp OR Forehead Trauma.mp OR Forehead Traumas.mp OR Brain Concussion.mp OR Brain Concussions.mp OR Diffuse Axonal Injury.mp OR Diffuse Axonal Injuries.mp OR Traumatic Intracranial Hemorrhage.mp OR Traumatic Intracranial Hemorrhages.mp OR Traumatic Intracranial Hematoma.mp OR Traumatic Intracranial Hematomas.mp OR Glasgow Coma Scale/ OR Glasgow Coma scale.mp OR Brain Damage, Chronic/ OR Brain Damage.mp OR Brain Damages.mp<br><br>Epilepsy, Post-Traumatic/ OR Post-Traumatic Epilepsy/ OR Post-Traumatic Epilepsies/ OR Posttraumatic Epilepsy/ OR Posttraumatic Epilepsies.mp OR Post-Traumatic Seizure Disorder.mp OR Post-Traumatic Seizure Disorders.mp OR Posttraumatic Seizure Disorder.mp OR Posttraumatic Seizure Disorders.mp OR Traumatic Epilepsy.mp OR Traumatic Epilepsies.mp OR Traumatic Seizure Disorder.mp OR Traumatic Seizure Disorders.mp OR Late Post-Traumatic Seizure.mp OR Late Post-Traumatic Seizures.mp OR Late Posttraumatic Seizure.mp OR Late Posttraumatic Seizures.mp OR Impact Seizure.mp OR Impact Seizures.mp OR Convulsive Convulsion.mp OR Convulsive Convulsions.mp OR Early Post-Traumatic Seizure.mp OR Early Post-Traumatic Seizures.mp OR Early Posttraumatic Seizure.mp OR Early Posttraumatic Seizures.mp |
| C       | Pharmacological treatment | Antipsychotic Agents/ OR Tranquilizing Agents/ OR Anti-Anxiety Agents/ OR Antimanic Agents/<br><br>acepromazine OR amoxapine OR asenapine OR azaperone OR benperidol OR butaclamol OR chlorpromazine OR chlorprothixene OR clopenthixol OR clozapine OR droperidol OR flupenthixol OR fluphenazine OR fluspirilene OR haloperidol OR levomepromazine OR loxapine OR loxapine succinate OR mesoridazine OR methiothepin OR methotrimeprazine OR molindone OR olanzapine OR paliperidone OR penfluridol OR perazine OR perphenazine OR pimozide OR prochlorperazine OR promazine OR quetiapine OR remoxipride OR reserpine OR risperidone OR ritanserine OR spiperone OR sulpiride OR thioridazine OR thiothixene OR tiapride hydrochloride OR trifluoperazine OR trifluoperidol OR trifluopromazine OR ziprasidone OR Lithium                                                                                                                                                                                                                                                                                                                                                                                                                                                                                                                                                                                                                                                                                                                                                                                                                                                                                                                                                                                                                                   |

1  
2  
3  
4  
5  
6  
7  
8  
9  
10  
11  
12  
13  
14  
15  
16  
17  
18  
19  
20  
21  
22  
23  
24  
25  
26  
27  
28  
29  
30  
31  
32  
33  
34  
35  
36  
37  
38  
39  
40  
41  
42  
43  
44  
45  
46  
47  
48  
49  
50  
51  
52  
53  
54  
55  
56  
57  
58  
59  
60

Adrenergic alpha-2 Receptor Agonists/ OR OR "Dexmedetomidine/  
Klofenil OR Clofenil OR Chlophazolin OR Clonidine OR "Clonidine  
Dihydrochloride" OR "Clonidine Hydrochloride" OR "Clonidine  
Monohydrochloride" OR "Clonidine Monohydrobromide" OR Guanfacine OR  
Lofexidine OR Gemiton OR Hemiton OR Isoglaucan OR Klofelin OR  
Clopheline OR Clofelin OR Catapres OR Catapressan OR Catapresan OR  
Dixarit OR Precedex OR Dixarit  
Adrenergic beta-Antagonists/ OR propranolol OR metoprolol OR pindolol

Central Nervous System Stimulants/

Metadate OR Equasym OR Methylin OR Modafinil OR Concerta OR  
Phenidylate OR Ritalin OR Ritaline OR Tsentedrin OR Centedrin OR Daytrana  
OR "Methylphenidate Hydrochloride"

Amphetamines/

Dopamine Agonists/ OR Dopamine Receptor Agonists/ OR "Dopaminergic  
Agonists" OR dopamine agents/

Amantadine OR Apomorphine OR Bromocriptine OR Metergoline OR  
Piribedil OR Gabapentin OR "Gabapentin enacarbil" OR Neurontin

Anticonvulsants/ OR Anticonvulsive OR "Anti-convulsive" OR Anticonvulsant  
OR Anticonvulsants OR "Anti-convulsant" OR "Anti-convulsants" OR  
Antiepileptic OR Antiepileptics OR "Anti-epileptic" OR "Anti-epileptics"  
"valproic acid" OR carbamazepine OR phenytoin OR lamotrigine OR  
Pregabalin

Antidepressive Agents/ OR Antidepressants OR "Anti-depressant" OR "Anti-  
depressants" OR "Anti-depressive" OR amitryptiline OR desipramine OR  
doxepin OR imipramine

Serotonin Uptake Inhibitors/ OR fluoxetine OR fluvoxamine OR sertraline OR  
citalopram OR Trazodone OR buspirone

Search strategy

« A » & « B » & « C »



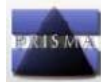

# PRISMA 2009 Checklist

| Section/topic                      | #  | Checklist item                                                                                                                                                                                                                                                                                              | Reported on page # |
|------------------------------------|----|-------------------------------------------------------------------------------------------------------------------------------------------------------------------------------------------------------------------------------------------------------------------------------------------------------------|--------------------|
| <b>TITLE</b>                       |    |                                                                                                                                                                                                                                                                                                             |                    |
| Title                              | 1  | Identify the report as a systematic review, meta-analysis, or both.                                                                                                                                                                                                                                         | 1                  |
| <b>ABSTRACT</b>                    |    |                                                                                                                                                                                                                                                                                                             |                    |
| Structured summary                 | 2  | Provide a structured summary including, as applicable: background; objectives; data sources; study eligibility criteria, participants, and interventions; study appraisal and synthesis methods; results; limitations; conclusions and implications of key findings; systematic review registration number. | 3                  |
| <b>INTRODUCTION</b>                |    |                                                                                                                                                                                                                                                                                                             |                    |
| Rationale                          | 3  | Describe the rationale for the review in the context of what is already known.                                                                                                                                                                                                                              | 4                  |
| Objectives                         | 4  | Provide an explicit statement of questions being addressed with reference to participants, interventions, comparisons, outcomes, and study design (PICOS).                                                                                                                                                  | 5                  |
| <b>METHODS</b>                     |    |                                                                                                                                                                                                                                                                                                             |                    |
| Protocol and registration          | 5  | Indicate if a review protocol exists, if and where it can be accessed (e.g., Web address), and, if available, provide registration information including registration number.                                                                                                                               | 5                  |
| Eligibility criteria               | 6  | Specify study characteristics (e.g., PICOS, length of follow-up) and report characteristics (e.g., years considered, language, publication status) used as criteria for eligibility, giving rationale.                                                                                                      | 5                  |
| Information sources                | 7  | Describe all information sources (e.g., databases with dates of coverage, contact with study authors to identify additional studies) in the search and date last searched.                                                                                                                                  | 6                  |
| Search                             | 8  | Present full electronic search strategy for at least one database, including any limits used, such that it could be repeated.                                                                                                                                                                               | 6                  |
| Study selection                    | 9  | State the process for selecting studies (i.e., screening, eligibility, included in systematic review, and, if applicable, included in the meta-analysis).                                                                                                                                                   | 6                  |
| Data collection process            | 10 | Describe method of data extraction from reports (e.g., piloted forms, independently, in duplicate) and any processes for obtaining and confirming data from investigators.                                                                                                                                  | 7                  |
| Data items                         | 11 | List and define all variables for which data were sought (e.g., PICOS, funding sources) and any assumptions and simplifications made.                                                                                                                                                                       | 7                  |
| Risk of bias in individual studies | 12 | Describe methods used for assessing risk of bias of individual studies (including specification of whether this was done at the study or outcome level), and how this information is to be used in any data synthesis.                                                                                      | 8                  |
| Summary measures                   | 13 | State the principal summary measures (e.g., risk ratio, difference in means).                                                                                                                                                                                                                               | N/A                |
| Synthesis of results               | 14 | Describe the methods of handling data and combining results of studies, if done, including measures of consistency (e.g., $I^2$ ) for each meta-analysis.                                                                                                                                                   | N/A                |



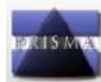

# PRISMA 2009 Checklist

Page 1 of 2

| Section/topic                 | #  | Checklist item                                                                                                                                                                                           | Reported on page # |
|-------------------------------|----|----------------------------------------------------------------------------------------------------------------------------------------------------------------------------------------------------------|--------------------|
| Risk of bias across studies   | 15 | Specify any assessment of risk of bias that may affect the cumulative evidence (e.g., publication bias, selective reporting within studies).                                                             | 13                 |
| Additional analyses           | 16 | Describe methods of additional analyses (e.g., sensitivity or subgroup analyses, meta-regression), if done, indicating which were pre-specified.                                                         | N/A                |
| <b>RESULTS</b>                |    |                                                                                                                                                                                                          |                    |
| Study selection               | 17 | Give numbers of studies screened, assessed for eligibility, and included in the review, with reasons for exclusions at each stage, ideally with a flow diagram.                                          | 8                  |
| Study characteristics         | 18 | For each study, present characteristics for which data were extracted (e.g., study size, PICOS, follow-up period) and provide the citations.                                                             | Table 1            |
| Risk of bias within studies   | 19 | Present data on risk of bias of each study and, if available, any outcome level assessment (see item 12).                                                                                                | Table 5            |
| Results of individual studies | 20 | For all outcomes considered (benefits or harms), present, for each study: (a) simple summary data for each intervention group (b) effect estimates and confidence intervals, ideally with a forest plot. | Tables 3 and 4     |
| Synthesis of results          | 21 | Present results of each meta-analysis done, including confidence intervals and measures of consistency.                                                                                                  | N/A                |
| Risk of bias across studies   | 22 | Present results of any assessment of risk of bias across studies (see Item 15).                                                                                                                          | Table 5            |
| Additional analysis           | 23 | Give results of additional analyses, if done (e.g., sensitivity or subgroup analyses, meta-regression [see Item 16]).                                                                                    | N/A                |
| <b>DISCUSSION</b>             |    |                                                                                                                                                                                                          |                    |
| Summary of evidence           | 24 | Summarize the main findings including the strength of evidence for each main outcome; consider their relevance to key groups (e.g., healthcare providers, users, and policy makers).                     | 13-16              |
| Limitations                   | 25 | Discuss limitations at study and outcome level (e.g., risk of bias), and at review-level (e.g., incomplete retrieval of identified research, reporting bias).                                            | 16                 |
| Conclusions                   | 26 | Provide a general interpretation of the results in the context of other evidence, and implications for future research.                                                                                  | 17                 |
| <b>FUNDING</b>                |    |                                                                                                                                                                                                          |                    |
| Funding                       | 27 | Describe sources of funding for the systematic review and other support (e.g., supply of data); role of funders for the systematic review.                                                               | 1                  |

From: Moher D, Liberati A, Tetzlaff J, Altman DG, The PRISMA Group (2009). Preferred Reporting Items for Systematic Reviews and Meta-Analyses: The PRISMA Statement. PLoS Med 6(7): e1000097. doi:10.1371/journal.pmed1000097

For more information, visit: [www.prisma-statement.org](http://www.prisma-statement.org).

Page 2 of 2

For peer review only - <http://bmjopen.bmj.com/site/about/guidelines.xhtml>

# BMJ Open

## Pharmacological interventions for agitated behaviors in patients with traumatic brain injury: a systematic review

|                                 |                                                                                                                                                                                                                                                                                                                                                                                                                                                                                                                                                                                                                                                                                                                                                                                                                                                                                                                                                                                  |
|---------------------------------|----------------------------------------------------------------------------------------------------------------------------------------------------------------------------------------------------------------------------------------------------------------------------------------------------------------------------------------------------------------------------------------------------------------------------------------------------------------------------------------------------------------------------------------------------------------------------------------------------------------------------------------------------------------------------------------------------------------------------------------------------------------------------------------------------------------------------------------------------------------------------------------------------------------------------------------------------------------------------------|
| Journal:                        | <i>BMJ Open</i>                                                                                                                                                                                                                                                                                                                                                                                                                                                                                                                                                                                                                                                                                                                                                                                                                                                                                                                                                                  |
| Manuscript ID                   | bmjopen-2019-029604.R2                                                                                                                                                                                                                                                                                                                                                                                                                                                                                                                                                                                                                                                                                                                                                                                                                                                                                                                                                           |
| Article Type:                   | Research                                                                                                                                                                                                                                                                                                                                                                                                                                                                                                                                                                                                                                                                                                                                                                                                                                                                                                                                                                         |
| Date Submitted by the Author:   | 12-Jun-2019                                                                                                                                                                                                                                                                                                                                                                                                                                                                                                                                                                                                                                                                                                                                                                                                                                                                                                                                                                      |
| Complete List of Authors:       | Williamson, David ; Université de Montréal, Pharmacy; Hôpital du Sacré-Coeur de Montréal, Pharmacy<br>Frenette, Anne-Julie; Université de Montréal, Pharmacy; Hôpital du Sacré-Coeur de Montréal, Pharmacy<br>Burry, Lisa; Mount Sinai Hospital Pharmacy Department; University of Toronto Leslie Dan Faculty of Pharmacy<br>Perreault, Marc; Université de Montréal, Pharmacy; McGill University Health Centre, Pharmacy<br>Charbonney, Emmanuel; Université de Montréal Faculté de médecine<br>Lamontagne, François; Université de Sherbrooke, Médecine<br>Potvin, Marie-Julie; Hôpital du Sacré-Coeur de Montréal, Psychologie<br>Giguère, Jean-François; Hôpital du Sacré-Coeur de Montréal, Neurosurgery; Université de Montréal, Médecine<br>Mehta, Sangeeta; University of Toronto, Department of Medicine, Interdepartmental Division of Critical Care Medicine<br>Bernard, Francis; Hôpital du Sacré-Coeur de Montréal, Critical Care; Université de Montréal, Médecine |
| <b>Primary Subject Heading</b>: | Pharmacology and therapeutics                                                                                                                                                                                                                                                                                                                                                                                                                                                                                                                                                                                                                                                                                                                                                                                                                                                                                                                                                    |
| Secondary Subject Heading:      | Neurology, Mental health                                                                                                                                                                                                                                                                                                                                                                                                                                                                                                                                                                                                                                                                                                                                                                                                                                                                                                                                                         |
| Keywords:                       | Neurological injury < NEUROLOGY, REHABILITATION MEDICINE, Delirium & cognitive disorders < PSYCHIATRY                                                                                                                                                                                                                                                                                                                                                                                                                                                                                                                                                                                                                                                                                                                                                                                                                                                                            |
|                                 |                                                                                                                                                                                                                                                                                                                                                                                                                                                                                                                                                                                                                                                                                                                                                                                                                                                                                                                                                                                  |

SCHOLARONE™  
Manuscripts

1  
2  
3 1 **Pharmacological interventions for agitated behaviors in patients with traumatic**  
4 2 **brain injury: a systematic review**  
5 3

6 4 David R. Williamson, B.Pharm, M.Sc., Ph.D.<sup>1,2</sup> david.williamson@umontreal.ca  
7 5 Anne Julie Frenette, B.Pharm, M.Sc.<sup>1,2</sup> anne.julie.frenette@umontreal.ca  
8 6 Lisa Burry, B.Sc.Pharm, Pharm.D.<sup>3</sup> lisa.burry@sinaihealthsystem.ca  
9 7 Marc M. Perreault, B.Pharm, M.Sc., Pharm.D.<sup>2,4</sup> marc.perreault@umontreal.ca  
10 8 Emmanuel Charbonney, M.D., Ph.D.<sup>5,6</sup> emmanuel.charbonney@umontreal.ca  
11 9 François Lamontagne, M.D., M.Sc. FRCPC<sup>7</sup> francois.Lamontagne@USherbrooke.ca  
12 10 Marie-Julie Potvin, Ph.D.<sup>8</sup> potvin.marie\_julie@uqam.ca  
13 11 Jean-François Giguère, M.D., Ph.D. FRSC<sup>6,9</sup> jean-francois.giguere.1@umontreal.ca  
14 12 Sangeeta Mehta, M.D., FRCPC<sup>10</sup> geeta.Mehta@sinaihealthsystem.ca  
15 13 Francis Bernard, M.D. FRCPC<sup>5,6</sup> f.bernard@umontreal.ca  
16 14

17 15 <sup>1</sup> Pharmacy department and Research center, Hôpital du Sacré-Coeur de Montréal

18 16 <sup>2</sup> Faculté de pharmacie, Université de Montréal

19 17 <sup>3</sup> Department of Pharmacy and Medicine, Sinai Health System and Leslie Dan Faculty of  
20 18 Pharmacy, University of Toronto.

21 19 <sup>4</sup> Department of Pharmacy, McGill University Health Center

22 20 <sup>5</sup> Department of Critical Care and Research center, Hôpital du Sacré-Coeur de Montréal

23 21 <sup>6</sup> Faculté de Médecine, Université de Montréal

24 22 <sup>7</sup> Centre de recherche, CHU de Sherbrooke

25 23 <sup>8</sup> Department of medicine, Faculté de Médecine, Université de Sherbrooke

26 24 <sup>8</sup> Department of Psychology, Hôpital du Sacré-Coeur de Montréal and department of  
27 25 Psychology, Université du Québec à Montréal;

28 26 <sup>9</sup> Department of Neurosurgery, Hôpital du Sacré-Coeur de Montréal

29 27 <sup>10</sup> Department of Medicine, Interdepartmental Division of Critical Care Medicine, Mount  
30 28 Sinai Hospital and University of Toronto

31 29  
32 30 Corresponding author:

33 31 David Williamson, Ph.D.

34 32 Pharmacy department and research center

35 33 Hôpital du Sacré-Coeur de Montréal

36 34 5400 Gouin West

37 35 Montreal, Quebec

38 36 Canada, H4J 1C5  
39 37

40 38 **Author Disclosure Statement**

41 39 No competing financial interests exist.  
42 40

43 40 **Funding**

44 41 The study was supported by a Trauma consortium grant from the Fonds de recherche du

45 42 Québec –Santé  
46 43  
47 44  
48 45  
49 46  
50 47  
51 48  
52 49  
53 50  
54 51  
55 52  
56 53  
57 54  
58 55  
59 56  
60 57

1  
2  
3 43 **Word count:** 3745 words  
4  
5  
6 44  
7  
8  
9  
10  
11  
12  
13  
14  
15  
16  
17  
18  
19  
20  
21  
22  
23  
24  
25  
26  
27  
28  
29  
30  
31  
32  
33  
34  
35  
36  
37  
38  
39  
40  
41  
42  
43  
44  
45  
46  
47  
48  
49  
50  
51  
52  
53  
54  
55  
56  
57  
58  
59  
60

For peer review only

1  
2  
3 45 **Abstract**

4 46  
5 47 **Objective:** The aim of this systematic review was to assess the efficacy and safety of  
6  
7 48 pharmacological agents in the management of agitated behaviors following TBI.

8  
9  
10 49 **Methods:** We performed a search strategy in PubMed, OvidMEDLINE®, Embase,  
11  
12 50 CINAHL, PsycINFO, Cochrane Library, Google Scholar, Directory of Open Access  
13  
14 51 Journals, LILACS, Web of Science and Prospero (up to December 10th 2018) for  
15  
16 52 published and unpublished evidence on the risks and benefits of 9 pre-specified  
17  
18 53 medications classes used to control agitated behaviors following TBI. We included all  
19  
20 54 randomized controlled trials, quasi-experimental and observational studies examining the  
21  
22 55 effects of medications administered to control agitated behaviors in TBI patients. Included  
23  
24 56 studies were classified into 3 mutually exclusive categories: 1) agitated behavior was the  
25  
26 57 presenting symptom; 2) agitated behavior was not the presenting symptom, but was  
27  
28 58 measured as an outcome variable and; 3) safety of pharmacological interventions  
29  
30 59 administered to control agitated behaviors was measured.

31  
32  
33 60 **Results:** Among the 181 articles assessed for eligibility, 21 studies were included. Of the  
34  
35 61 studies suggesting possible benefits, propranolol reduced maximum intensities of  
36  
37 62 agitation per week and physical restraint use, methylphenidate improved anger measures  
38  
39 63 following 6 weeks of treatment, valproic acid reduced weekly agitated behavior scale  
40  
41 64 ratings and olanzapine reduced irritability, aggressiveness and insomnia between weeks  
42  
43 65 1 and 3 of treatment. Amantadine showed variable effects and may increase the risk of  
44  
45 66 agitation in the critically ill. In 3 studies evaluating safety outcomes, antipsychotics were  
46  
47 67 associated with an increased duration of post-traumatic amnesia in unadjusted analyses.  
48  
49 68 Small sample sizes, heterogeneity and an unclear risk of bias were limits.

1  
2  
3 69 **Conclusions:** Propranolol, methylphenidate, valproic acid and olanzapine may offer  
4  
5 70 some benefit, however, they need to be further studied. Antipsychotics may increase the  
6  
7 71 length of post-traumatic amnesia. More studies on tailored interventions and continuous  
8  
9 72 evaluation of safety and efficacy throughout acute, rehabilitation and outpatient settings  
10  
11 73 are needed.  
12  
13  
14  
15 74

16  
17 75 **Systematic review registration:** Prospero CRD42016033140  
18

19 76 **Keywords:** Traumatic brain injury, agitation, Pharmacological intervention  
20  
21 77

### 22 78 **Strengths and limitations of this study** 23 24 79

- 25  
26  
27 80 ▪ This systematic review assessed the efficacy and safety of pharmacological agents in  
28  
29 81 the management of agitated behaviors following traumatic brain injury
- 30  
31 82 ▪ Randomized controlled trials, quasi-experimental and observational studies were  
32  
33 83 reviewed
- 34  
35 84 ▪ The included studies were limited by small sample sizes, variations in the different  
36  
37 85 agitated behaviors and populations studied
- 38  
39 86 ▪ The review found insufficient data to recommend the use of any agent for the  
40  
41 87 management of agitated behaviors following TBI  
42  
43  
44  
45  
46 88

## 89 Introduction

90 Traumatic brain injury (TBI) occurs when an external force is applied to the head leading  
91 to alterations in brain function including decreased level of consciousness, post-traumatic  
92 amnesia, and changes in behavior and cognition that can persist in the long term. In the  
93 United States alone, approximately 50,000 people die each year from TBI and more than  
94 5 million live with TBI-related disabilities.<sup>1, 2</sup> While TBI has a substantial impact on direct  
95 healthcare costs, indirect costs from lost productivity also represent a significant economic  
96 burden.<sup>3, 4</sup> Agitated behaviors are a frequent behavioural problem following TBI.<sup>5, 6</sup> They  
97 have been broadly defined as a state of confusion that follows the initial injury and is  
98 characterised by disruptive behaviours. A constellation of behaviors has been associated  
99 with the term “agitation” in TBI patients, including restlessness, confusion, physical and  
100 verbal aggression, impulsivity, perceptual disturbances, and inattention creating a very  
101 heterogeneous group of patients to study.<sup>7</sup> Agitation has been reported in 20-41% of  
102 patients during the early stage of recovery in acute care units and up to 70% of patients  
103 in rehabilitation units.<sup>6, 8-13</sup> It can result in harm to patients and caregivers, interfere with  
104 treatments, lead to the use of physical and pharmacological restraints, increase hospital  
105 length of stay, delay rehabilitation and impede functional independence.<sup>10-12, 14-16</sup> In TBI  
106 outpatients, neurobehavioral symptoms may be different in nature. Aggressive behaviour  
107 and irritability, more than physical agitation are generally reported. A variety of agents  
108 such as antidepressants, anticonvulsants, stimulants, and antipsychotics have been used  
109 for the management of neurobehavioral complications of TBI.<sup>17, 18</sup> However, preclinical  
110 studies have suggested that repeated use of certain agents such as haloperidol,  
111 risperidone and diazepam may reduce cognitive and functional recovery.<sup>19-22</sup> Thus, it  
112 remains unclear which pharmacological agents are the most effective and safest for the

1  
2  
3 113 management of agitated behaviors in TBI patients. A Cochrane Systematic Review  
4  
5 114 published in 2006 showed a lack of evidence to support any agent.<sup>23</sup> Since then, two  
6  
7 115 additional systematic reviews concluded that the evidence was insufficient and too weak  
8  
9 116 to recommend any specific agent, however they included only French and English studies  
10  
11 117 published before January 2016, had incomplete search strategies, and did not include the  
12  
13 118 grey literature.<sup>24, 25</sup> To advance this field, we updated and broadened the literature  
14  
15 119 search, included all languages and included studies in which an agitated behaviour was  
16  
17 120 not an eligibility criterion, but was measured as an outcome variable . The aim of this  
18  
19 121 systematic review was to assess the efficacy and safety of pharmacological agents in the  
20  
21 122 management of agitated behaviors following TBI compared to placebo or other  
22  
23 123 treatments.  
24  
25  
26  
27  
28  
29  
30

## 31 **Methods**

32  
33  
34 126 The review protocol has been registered in PROSPERO International Prospective  
35  
36 127 Register of Systematic Reviews (CRD42016033140), conducted according to the  
37  
38 128 Preferred Reporting Items for Systematic Review and Meta-Analysis (PRISMA) guidelines  
39  
40 129 and published in a peer-reviewed journal.<sup>26, 27</sup> We included all randomized controlled,  
41  
42 130 quasi-experimental, and observational studies with control groups that had a majority  
43  
44 131 (>50%) of patients with TBI. We excluded case reports, case series, and observational  
45  
46 132 studies without control groups. We included studies of all type of patients who suffered a  
47  
48 133 TBI, including children and adults, in both the early stages of recovery and in rehabilitation.  
49  
50 134 We included 3 mutually exclusive types of studies: 1) those evaluating the use of  
51  
52 135 pharmacological interventions in which an agitated behaviour, not further defined, was  
53  
54  
55  
56  
57  
58  
59  
60



1  
2  
3 136 one of the eligibility criteria for the study; 2) those in which an agitated behaviour was not  
4  
5 137 an eligibility criterion, but was measured as an outcome variable; and 3) those specifically  
6  
7 138 assessing the safety of pharmacological agents used to treat agitation in TBI patients. In  
8  
9  
10 139 this systematic review, we considered agitation, aggressiveness, assaultive behaviour,  
11  
12 140 irritability and confusion as part of agitated behaviours. All medications considered in this  
13  
14 141 review were pre-specified and consisted in the following: beta-adrenergic blockers, typical  
15  
16 142 and atypical antipsychotics, anticonvulsants, dopamine agonists, psychostimulants,  
17  
18 143 antidepressants, alpha-2-adrenergic agonists, hypnotics and anxiolytics. Studies were  
19  
20 144 included whether the investigators compared a medication to placebo, a medication to  
21  
22 145 another medication, or various combinations of different medications.  
23  
24  
25  
26

27 146 The primary outcome was a reduction in severity of the agitated behavior as measured in  
28  
29 147 each study. If feasible, we reported resolution of agitated behaviours as well as changes  
30  
31 148 in duration and type of symptoms (confusion, aggressiveness, inattention, hallucinations,  
32  
33 149 disorientation, and inappropriate mood or speech). Secondary outcomes include lengths  
34  
35 150 of stay, (ICU length of stay, hospital LOS for the early rehabilitation phase), adverse  
36  
37 151 events (extrapyramidal effects, QTc prolongation, cardiac arrhythmias, hypotension,  
38  
39 152 seizures, behavioural effects), use of physical restraints in ICU, cognitive and functional  
40  
41 153 outcomes at hospital discharge and at one year post-TBI.  
42  
43  
44  
45

#### 46 154 **Patient and public involvement statement**

47  
48  
49 155 This research was done without patient involvement. Patients were not invited to  
50  
51 156 comment on the study design and were not consulted to develop patient relevant  
52  
53 157 outcomes or interpret the results. Patients were not invited to contribute to the writing or  
54  
55 158 editing of this document for readability or accuracy.  
56  
57  
58  
59  
60

### 159 *Search strategy*

160 A search strategy was devised with the help of Health Sciences librarian (supplementary  
161 file) and using the Peer Review for Electronic Search Strategies (PRESS) checklist was  
162 conducted in the following databases: PubMed, OvidMEDLINE®, OvidMEDLINE® In-  
163 Process & Other Non-Indexed Citations, Embase, CINAHL, PsycINFO, Cochrane Library,  
164 Google Scholar, Directory of Open Access Journals, LILACS, Web of Science and  
165 Prospero (<http://www.crd.york.ac.uk/PROSPERO/>) up to December 10th 2018.<sup>28</sup> A grey  
166 literature search was also performed using the resources suggested in CADTH's *Grey*  
167 *Matters* (<http://www.cadth.ca/en/resources/finding-evidence-is/grey-matters>). As  
168 described in our published protocol, we searched abstracts from annual scientific  
169 meetings from relevant groups in the last 5 years.<sup>26</sup> Finally, references of identified studies  
170 as well as other types of articles (reviews, book chapters) were screened.

### 172 *Data collection and analysis*

173 Two reviewers (DW, AJF) independently screened titles and abstracts for eligible  
174 publications. The same reviewers then assessed the complete report of each retained  
175 citations for eligibility. Disagreements were resolved by consensus and discussion with a  
176 third reviewer was not required.

### 178 *Data extraction and management*

179 Data from all included studies were extracted by two independent reviewers (AJF and  
180 DW) and in duplicate using a pre-tested data extraction form. The following variables were  
181 recorded for each study: study title, name of the first author, year of publication, country

1  
2  
3 182 of origin, language of publication, publication type (journal article, conference proceeding,  
4  
5 183 abstract, thesis), clinical setting (intensive care unit, hospital ward, rehabilitation unit,  
6  
7 184 outpatient), study design (randomized controlled, blinded or open, non-randomized  
8  
9 185 controlled, prospective or retrospective, crossover), population (paediatric, adult), patient  
10  
11 186 characteristics (age, gender, isolated TBI or multiple trauma including TBI, severity of TBI  
12  
13 187 according to Glasgow Coma Scale, days from TBI at inclusion, inclusion and exclusion  
14  
15 188 criteria), characteristics of the intervention and control treatment (type of pharmacological  
16  
17 189 agent, dose, frequency and duration of the therapy), agitation measurement tool,  
18  
19 190 description of the specific agitated behaviours (definition, frequency, duration), and clinical  
20  
21 191 outcomes (length of stay), adverse events, use of physical restraints during ICU stay,  
22  
23 192 duration of post traumatic amnesia, cognitive function at ICU discharge and at one year,  
24  
25 193 and functional outcome at ICU discharge and at one year. We contacted the  
26  
27 194 corresponding author for clarifications when necessary. In the case of an abstract not  
28  
29 195 available in English, the research team included authors fluent in French, Spanish,  
30  
31 196 German, and Italian, who were able to read the abstract. Among selected articles, only  
32  
33 197 one article in Spanish was included. The article was reviewed by authors fluent in Spanish.  
34  
35 198  
36  
37  
38  
39  
40  
41

#### 42 199 *Assessment of risk of bias*

43  
44 200 Two reviewers (DW, AJF) independently evaluated each included study with the  
45  
46 201 Cochrane Collaboration tool for randomized controlled trials and the Ottawa-Newcastle  
47  
48 202 tool for observational studies, respectively.<sup>29, 30</sup> In case of disagreement concerning the  
49  
50 203 risk of bias, a third reviewer (FB) was consulted to resolve the issue.  
51  
52  
53

#### 54 204 *Patient and public involvement*

55  
56 205 Patients and or public were not involved in the conduct of this systematic review.  
57  
58  
59  
60

1  
2  
3 2064 207 **Results**

5 208

6 209 *Study selection*

7 210

8 211 The database search (up to December 10th 2018) retrieved 11 170 unique citations of

9 212 which 10 989 were excluded based on title and abstracts (Figure 1). We assessed 181

10 213 full-text articles for eligibility and 21 studies were included. A total of eight studies

11 214 evaluated the use of pharmacological interventions in which an agitated behaviour was

12 215 the presenting symptom or one of the presenting symptoms.<sup>31-38</sup> In nine other studies,

13 216 agitated behaviour was not the presenting symptom, but was measured as an outcome

14 217 variable.<sup>39-47</sup> Finally, four studies specifically assessed the safety of pharmacological15 218 agents used for agitated behaviours in TBI.<sup>48-51</sup>

16 219

17 220 *Agitated behaviors as the presenting symptom*

18 221

19 222 The eight included studies evaluated various aspects ranging from aggressiveness to

20 223 irritability and confusion (Table 1).<sup>31-38</sup> The behaviors were evaluated using the following

21 224 tools (Table 2): agitated behavior scale (ABS), confusion assessment protocol, State-Trait

22 225 Anger scale, the overt aggression scale, Richmond Agitation Sedation Scale (RASS) and

23 226 neuropsychiatric inventory irritability and aggression domains (NPI-I and NPI-A).<sup>52</sup>

24 227

25 228

26 229

27 230

28 231

29 232

30 233

31 234

32 235

33 236

34 237

35 238

36 239

37 240

38 241

39 242

40 243

41 244

42 245

43 246

227 **Table 1 – Study characteristics**

| Study/Year<br>(N)                               | Publication/<br>Country | Study<br>design            | Study<br>focus/Population                          | Interventional<br>arm/Population     | Comparative<br>arm/Population | Location at<br>randomization                                      | Timing from TBI<br>at randomization            | TBI<br>description            |
|-------------------------------------------------|-------------------------|----------------------------|----------------------------------------------------|--------------------------------------|-------------------------------|-------------------------------------------------------------------|------------------------------------------------|-------------------------------|
| 1. Agitated behaviour as the presenting symptom |                         |                            |                                                    |                                      |                               |                                                                   |                                                |                               |
| Brooke <sup>30</sup><br>1992<br>N=21            | Published<br>USA        | RCT<br>parallel            | Agitation<br>Mean age 31<br>87 men and 13<br>women | Propranolol 60-<br>420mg daily       | Placebo                       | Level 1<br>trauma and<br>rehabilitation<br>center                 | N/A                                            | Severe blunt<br>TBI           |
| Mooney <sup>31</sup><br>1993<br>N=38            | Published<br>USA        | Randomize<br>d<br>Pre-post | Anger<br>Mean age 29 ± 10<br>Male gender<br>100%   | Methylphenidate<br>30mg/day          | Placebo                       | Outpatient                                                        | 6 months or<br>more (mean 27<br>+/- 21 months) | Severe blunt<br>TBI           |
| Yablon<br>2010 <sup>32</sup><br>N=79            | Abstract<br>USA         | RCT<br>parallel            | Confusion<br>Age and gender<br>not reported        | Amantadine<br>100mg bid X 14<br>days | Placebo                       | Inpatient brain<br>injury unit of a<br>rehabilitation<br>hospital | ≤ 6 months                                     | TBI not<br>further<br>defined |
| Hammond <sup>34</sup><br>2014<br>N=76           | Published<br>USA        | RCT<br>parallel            | Irritability and<br>aggression                     | Amantadine<br>100mg bid              | Placebo<br>38 +/-12           | Outpatient                                                        | ≥ 6 months<br>following a TBI                  | Blunt TBI                     |

|                                           |                    |                                 |                                                        |                                                                        |                                                        |            |                               |                               |
|-------------------------------------------|--------------------|---------------------------------|--------------------------------------------------------|------------------------------------------------------------------------|--------------------------------------------------------|------------|-------------------------------|-------------------------------|
|                                           |                    |                                 |                                                        | Mean age 40 +/-<br>13<br>Male gender<br>74.4%                          | Male gender<br>80.5%                                   |            |                               |                               |
| Beresford <sup>30</sup><br>2015<br>N=50   | Abstract<br>USA    | RCT<br>parallel                 | Agitation<br>Mean age 47 ± 14<br>46 men and 4<br>women | Valproic acid<br>for level 50-100<br>mcg/ml                            | Placebo                                                | Outpatient | > 1 year<br>following TBI     | Mild and<br>moderate<br>TBI   |
| Hammond <sup>33</sup><br>2015<br>N=168    | Published<br>USA   | RCT<br>parallel                 | Irritability and<br>aggression                         | Amantadine<br>100mg bid<br>Mean age 40 ±<br>13<br>Male gender<br>80.5% | Placebo<br>Mean age 38 ±<br>12<br>Male gender<br>74.4% | Outpatient | ≥ 6 months<br>following a TBI | Blunt TBI                     |
| Maturana <sup>37</sup><br>Waidele<br>2009 | Published<br>Chile | Prospective<br>double-<br>blind | Restlessness,<br>Irritability,                         | Olanzapine (dose<br>not specified)                                     | Placebo                                                | Outpatient | N/A                           | TBI not<br>further<br>defined |

1  
2  
3  
4  
5  
6  
7  
8  
9  
10  
11  
12  
13  
14  
15  
16  
17  
18  
19  
20  
21  
22  
23  
24  
25  
26  
27  
28  
29  
30  
31  
32  
33  
34  
35  
36  
37  
38  
39  
40  
41  
42  
43  
44  
45  
46  
47

| N=31                                               |                     |                                | Aggression,<br>Insomnia<br>Age and gender<br>not reported                 |                                                                      |                                                            |                             |                                  |                               |
|----------------------------------------------------|---------------------|--------------------------------|---------------------------------------------------------------------------|----------------------------------------------------------------------|------------------------------------------------------------|-----------------------------|----------------------------------|-------------------------------|
| Gramish <sup>35</sup><br>2017<br>N=139             | Published<br>USA    | Retrospective<br>observational | Agitation                                                                 | Amantadine<br>100mg bid<br>Mean age 42 ± 17<br>Male gender:<br>81.4% | No amantadine<br>Mean age 48 ± 21<br>Male gender:<br>76.8% | Adult Trauma<br>ICU         | Acute TBI                        | TBI not<br>further<br>defined |
| 2. Agitated behavior is not the presenting symptom |                     |                                |                                                                           |                                                                      |                                                            |                             |                                  |                               |
| Study/Year<br>(N)                                  | Publication/Country | Study design                   | Study focus                                                               | Interventional arm                                                   | Comparative arm                                            | Location at randomization   | Timing from TBI at randomization | TBI description               |
| Schneider <sup>41</sup><br>1999<br>N=10            | Published<br>USA    | RCT<br>parallel                | Cognitive function<br>and behavior<br>Mean age 31<br>7 men and 3<br>women | Amantadine<br>50mg bid<br>increased to<br>150mg bid                  | Placebo                                                    | Outpatient                  | N/A                              | Moderate<br>and severe<br>TBI |
| Meythaler <sup>40</sup><br>2001 N=9                | Published<br>USA    | RCT<br>Crossover               | Recovery and<br>arousal                                                   | Sertraline                                                           | Placebo                                                    | Inpatient<br>rehabilitation | < 2 weeks of<br>TBI              | Severe TBI                    |

|                                         |                                         |                  |                                                                  |                                                           |                                                       |                                        |                                                |                                                |
|-----------------------------------------|-----------------------------------------|------------------|------------------------------------------------------------------|-----------------------------------------------------------|-------------------------------------------------------|----------------------------------------|------------------------------------------------|------------------------------------------------|
|                                         |                                         |                  | Age and gender<br>not reported                                   |                                                           |                                                       |                                        |                                                |                                                |
| Meythaler <sup>42</sup><br>2002<br>N=35 | Published<br>USA                        | RCT<br>Crossover | Neurological<br>recovery<br>Mean age 31<br>26 men and 9<br>women | Amantadine                                                | Placebo                                               | Emergency<br>department                | Between 4 days<br>and 6 weeks<br>following TBI | Severe blunt<br>TBI                            |
| Banos <sup>38</sup><br>2010<br>N=99     | Published<br>USA                        | RCT<br>parallel  | Cognitive function<br>and behavior                               | Sertraline<br>Mean age: 35 ±<br>17<br>Male gender:<br>79% | Placebo<br>Mean age 35 ±<br>16<br>Male gender:<br>66% | Level 1<br>trauma center<br>inpatients | < 8 weeks of<br>TBI                            | Moderate<br>and severe<br>TBI                  |
| Giacino <sup>39</sup><br>2012<br>N=184  | Published<br>USA,<br>Denmark,<br>Canada | RCT<br>parallel  | Functional<br>recovery                                           | Amantadine<br>Mean age: 35±15<br>Male gender:<br>74%      | Placebo<br>Mean age:<br>37±15<br>Male gender:<br>71%  | Inpatients                             | 4 to 16 weeks<br>following TBI                 | Vegetative or<br>minimally<br>conscious<br>TBI |
| Tramontana <sup>43</sup><br>2014        | Published<br>USA                        | RCT<br>Crossover | Attention<br>Mean age: 29±9<br>Male gender: 69%                  | Lysdexampheta-<br>mine                                    | Placebo                                               | Outpatient                             | 6-34 months<br>(mean 15.6 +/-                  | Moderate<br>and severe<br>TBI                  |



|                                                          |                                                                                               |                     |                  |                                                                    |                                                          |                                                 |                            |                                                   |
|----------------------------------------------------------|-----------------------------------------------------------------------------------------------|---------------------|------------------|--------------------------------------------------------------------|----------------------------------------------------------|-------------------------------------------------|----------------------------|---------------------------------------------------|
| 1<br>2<br>3<br>4<br>5<br>6<br>7<br>8<br>9<br>10          | N=22 but 13 completed the study                                                               |                     |                  |                                                                    |                                                          |                                                 | 10 months) since TBI       |                                                   |
| 11<br>12<br>13<br>14<br>15<br>16<br>17                   | Johansson <sup>45</sup><br>2014<br>N=24                                                       | Published<br>Sweden | RCT<br>Crossover | Mental fatigue and cognition<br>Mean age 39±11<br>Male gender: 50% | Methylphenidate<br>5mg and 20mg<br>tid                   | Placebo                                         | Outpatient                 | > 12 months following TBI<br>Mild or moderate TBI |
| 18<br>19<br>20<br>21<br>22<br>23<br>24<br>25<br>26<br>27 | Fann <sup>44</sup><br>2017<br>N=62                                                            | Published<br>USA    | RCT<br>parallel  | Major depression                                                   | Sertraline<br>Mean age: 38±12<br>Male gender: 74%        | Placebo<br>Mean age: 37±13<br>Male gender: 77%  | Level 1<br>trauma center   | < 1 year of TBI<br>Moderate and severe TBI        |
| 28<br>29<br>30<br>31<br>32<br>33<br>34<br>35<br>36<br>37 | Hart <sup>46</sup><br>2017<br>N=32                                                            | Published<br>USA    | RCT<br>parallel  | Cognitive function                                                 | Dextroamphetamine<br>Mean age: 39±16<br>Male gender: 65% | Placebo<br>Mean age: 39±18<br>Male gender: 100% | TBI<br>rehabilitation unit | < 6 months of TBI<br>Moderate and severe TBI      |
| 38<br>39<br>40<br>41<br>42<br>43<br>44<br>45<br>46<br>47 | 3. Studies assessing the safety of pharmacological agents used for agitated behaviours in TBI |                     |                  |                                                                    |                                                          |                                                 |                            |                                                   |

|                                                                                              |                                                  |                  |                                        |                                                                             |                                                         |                                                               |                                                             |                |                                 |
|----------------------------------------------------------------------------------------------|--------------------------------------------------|------------------|----------------------------------------|-----------------------------------------------------------------------------|---------------------------------------------------------|---------------------------------------------------------------|-------------------------------------------------------------|----------------|---------------------------------|
| 1<br>2<br>3<br>4<br>5<br>6<br>7<br>8<br>9<br>10<br>11<br>12                                  | Rao 1985 <sup>49</sup><br>N=26                   | Published<br>USA | Retrospecti<br>ve<br>observation<br>al | Rehabilitation<br>outcomes                                                  | Haloperidol<br>Median age: 34<br>Gender not<br>reported | No haloperidol<br>Median age:<br>22<br>Gender not<br>reported | Trauma and<br>rehabilitation<br>center                      | From admission | Severe<br>closed head<br>injury |
| 13<br>14<br>15<br>16<br>17<br>18<br>19<br>20<br>21                                           | Mysi <sup>w</sup> <sup>48</sup><br>2006<br>N=182 | Published<br>USA | Retrospecti<br>ve cohort               | Cognitive and<br>motor recovery<br>Mean age: 36<br>Male gender: 74%         | Narcotics,<br>benzodiazepines<br>and neuroleptics       | No CNS active<br>medications                                  | Level 1<br>trauma center<br>and<br>rehabilitation<br>center | From admission | TBI                             |
| 22<br>23<br>24<br>25<br>26<br>27<br>28<br>29<br>30<br>31                                     | Kooda <sup>50</sup><br>2015<br>N=195             | Abstract<br>USA  | Retrospecti<br>ve<br>observation<br>al | Duration of post-<br>traumatic<br>amnesia<br>Age and gender<br>not reported | Antipsychotics                                          | No<br>antipsychotic                                           | Level 1<br>trauma center<br>and<br>rehabilitation<br>center | From admission | TBI                             |
| 32<br>33<br>34<br>35<br>36<br>37<br>38<br>39<br>40<br>41<br>42<br>43<br>44<br>45<br>46<br>47 | Anderson <sup>47</sup><br>2016<br>N=101          | Published<br>USA | Retrospecti<br>ve cohort               | Seizures,<br>neuroleptic<br>malignant<br>syndrome, QTc<br>prolongation,     | Haloperidol<br>Median age 32<br>Male gender:<br>87%     | No haloperidol<br>Median age 47<br>Male gender:<br>61%        | Inpatients                                                  | From admission | Moderate<br>and severe<br>TBI   |

1  
2  
3  
4  
5  
6  
7  
8  
9  
10  
11  
12  
13  
14  
15  
16  
17  
18  
19  
20  
21  
22  
23  
24  
25  
26  
27  
28  
29  
30  
31  
32  
33  
34  
35  
36  
37  
38  
39  
40  
41  
42  
43  
44  
45  
46  
47

|  |  |  |                                                              |  |  |  |  |  |
|--|--|--|--------------------------------------------------------------|--|--|--|--|--|
|  |  |  | extrapyramidal<br>symptoms,<br>hematological<br>disturbances |  |  |  |  |  |
|--|--|--|--------------------------------------------------------------|--|--|--|--|--|

For peer review only

229 **Table 2 – Tools used to measure agitated behaviors**

| Tools                                                                              | Description                                                                                                                                                                                     |
|------------------------------------------------------------------------------------|-------------------------------------------------------------------------------------------------------------------------------------------------------------------------------------------------|
| Agitated behavior scale <sup>53</sup>                                              | Scale of 14 items with 4 levels of scoring to assess the nature and extent of agitation during the acute recovery of traumatic brain. Total scores greater than 21 are considered as agitation. |
| Brief Anger and Aggression Scale <sup>54</sup>                                     | A six-item measure developed for the rapid screening and identification of anger and aggression levels.                                                                                         |
| Confusion assessment protocol <sup>55</sup>                                        | Combination of orientation, cognition and other clinical measures of early confusion following traumatic brain injury.                                                                          |
| Functional independence measure (FIM) <sup>56</sup>                                | Functional assessment measure with a 18-item ordinal scale used in the rehabilitation population. It offers a useful assessment of patient progress during inpatient rehabilitation.            |
| Global improvement subscale of the Clinical Global Impressions (CGI) <sup>57</sup> | The CGI is a 3-item observer-rated scale that measures illness severity (CGIS), global improvement or change (CGIC) and therapeutic response.                                                   |
| Belligerence cluster score for the Katz adjustment scale (KAS) <sup>58</sup>       | The KAS is an observer rating scale used to assess the social adjustment of people with traumatic brain injury.                                                                                 |

|                                                                                                    |                                                                                                                                                                                                                                                                                                                                                                                                                                                                                                                                                                                                                                                        |
|----------------------------------------------------------------------------------------------------|--------------------------------------------------------------------------------------------------------------------------------------------------------------------------------------------------------------------------------------------------------------------------------------------------------------------------------------------------------------------------------------------------------------------------------------------------------------------------------------------------------------------------------------------------------------------------------------------------------------------------------------------------------|
| <p>Neuropsychiatric inventory irritability (NPI-I) and aggression domains (NPI-A)<sup>52</sup></p> | <p>The NPI is a 40-item scale evaluating 12 behavioral domains including irritability and aggression. The NPI irritability (NPI-I) items include bad temper, rapid mood changes, sudden anger, impatience, crankiness, and argumentative. Raters evaluate frequency and severity of behaviors in the last month. The NPI aggression domain assesses the tendency to get upset, resistance to activities, stubbornness, uncooperativeness, shouting, cursing, and physical behaviors indicative of aggression. The NPI score is the product of frequency and severity. The worst item score provided by the scorer is NPI-I or NPI-A most aberrant.</p> |
| <p>Neurobehavioral Function Inventory (NFI)<sup>59</sup></p>                                       | <p>The NFI provides information on the frequency of behaviors and symptoms commonly associated with brain injury. Two versions of the NFI are available, one for completion by family members, another for completion by the person with the injury.</p>                                                                                                                                                                                                                                                                                                                                                                                               |
| <p>Neurobehavioral rating scale (NRS)<sup>60</sup></p>                                             | <p>The NRS is a 28-item observer-rated instrument that measures a broad range of cognitive and noncognitive symptoms. It measures symptoms associated with psychiatric disorders as well as cognitive impairment and behavioral disturbances.</p>                                                                                                                                                                                                                                                                                                                                                                                                      |
| <p>Overt aggression scale (OAS)<sup>61</sup></p>                                                   | <p>Scale for the objective rating of verbal and physical aggression. The OAS measures aggressive behaviors divided into 4 categories: verbal aggression, physical aggression against objects, physical aggression against self, and physical aggression against others.</p>                                                                                                                                                                                                                                                                                                                                                                            |

|                                                                                 |                                                                                                                                                                                                                                                                                                                                                               |
|---------------------------------------------------------------------------------|---------------------------------------------------------------------------------------------------------------------------------------------------------------------------------------------------------------------------------------------------------------------------------------------------------------------------------------------------------------|
| Anger-Hostility factor score of the Profile of Mood States (POMS) <sup>32</sup> | The POMS consists of 65 adjectives that describe moods or feelings, to which the patient responds on a 5-point scale that ranges from “Not at all” to “Extremely”. The POMS measures six identifiable mood/affective states: tension-anxiety, depression-dejection, anger-hostility, vigor-activity (V); fatigue-inertia (F), and confusion-bewilderment (C). |
| State-Trait Anger Scale (STAS) <sup>32</sup>                                    | The STAS is a 20-item self-report scale assessing two types of anger (State and Trait). State anger is comprised of tension, annoyance, irritability or rage. Whereas trait anger is the frequency with which a person feels state anger over time.                                                                                                           |

1  
2  
3 231 Of the identified studies, two were conference abstracts that remained unpublished.<sup>33, 37</sup>  
4  
5 232 The studies evaluated propranolol<sup>31</sup>, amantadine<sup>33-35</sup>, methylphenidate<sup>32</sup>, valproic acid<sup>37</sup>  
6  
7 233 and olanzapine<sup>38</sup> in comparison to placebo. Five used a randomized controlled parallel  
8  
9 234 design<sup>31, 33-35, 37</sup>, one used a randomized pretest posttest control group design<sup>32</sup>, one was  
10  
11 235 a prospective double blind observational study<sup>38</sup> and, one was a retrospective  
12  
13 236 observational study.<sup>36</sup> All the studies exclusively enrolled adult (16 years or older) TBI  
14  
15 237 patients and three studies excluded older patients (greater than 65 or 75 years)<sup>34, 35, 37</sup>.  
16  
17 238 The studies mostly included patients in rehabilitation (n=2)<sup>31, 33</sup> and outpatient (n=5)  
18  
19 239 settings.<sup>32, 34, 35, 37, 38</sup> Only one study evaluated patients in an intensive care unit (ICU)  
20  
21 240 setting.<sup>36</sup> All the studies exclusively studied TBI patients.<sup>31-38</sup> Three studies identified in  
22  
23 241 an earlier systematic review were excluded (Figure 1) because TBI patients represented  
24  
25 242 less than 50% of the sample.<sup>23, 62-64</sup>  
26  
27  
28  
29  
30  
31 243  
32  
33 244 In the eight studies, one randomized trial evaluated the use of propranolol for the  
34  
35 245 treatment of agitation in severe blunt TBI patients (Table 3).<sup>31</sup> It reported a reduction in  
36  
37 246 the intensity of agitation episodes and in the use of physical restraints but failed to show  
38  
39 247 a reduction in the frequency of agitation episodes.<sup>31</sup> Amantadine was evaluated for the  
40  
41 248 management of confusion in a randomized trial, irritability in two randomized trials, and  
42  
43 249 agitation in a retrospective observational study.<sup>33-36</sup> The studies reported inconsistent  
44  
45 250 results (Table 3). In one unpublished study in the setting of rehabilitation within 90 days  
46  
47 251 of TBI (n=79), amantadine had no effect on confusion.<sup>33</sup> In a pilot study of outpatients who  
48  
49 252 suffered a TBI more than six months ago, amantadine showed significant reductions in  
50  
51 253 irritability and aggression using the Neuropsychiatric Inventory scale (NPI).<sup>35</sup> In a follow-  
52  
53 254 up study of 168 outpatients who had suffered a TBI more than 6 months ago, no difference  
54  
55  
56  
57  
58  
59  
60

1  
2  
3 255 in the incidence of irritability at 28 and 60 days using the NPI-I from observers (family  
4  
5 256 member, close friend, or employer) was reported.<sup>34</sup> Participants self-rating at day-60  
6  
7 257 indicated improvement in irritability ( $p < 0.04$ ) but the difference became non-significant  
8  
9 258 when adjusted for multiple comparisons. The Global improvement subscale of the Clinical  
10  
11 259 Global Impressions (CGI), which evaluates general emotional and behavioral function,  
12  
13 260 improved more in the amantadine group than in the placebo group at day 60 ( $p = 0.0354$ ).  
14  
15 261 A sub-analysis of patients with anger and aggression (118 of the 168 patients) in the same  
16  
17 262 study was also carried out and reported a statistically significant reduction in participant's  
18  
19 263 self-rated aggression at 60 days.<sup>65</sup> Finally, in a retrospective observational study ( $n = 139$ ),  
20  
21 264 patients exposed to amantadine in the ICU reported more agitation episodes defined as  
22  
23 265 a Richmond Agitation Sedation Score of +2 or higher (38% vs 14%) in an unadjusted  
24  
25 266 analysis.<sup>36</sup> The use of amantadine was also associated with an increased median ICU  
26  
27 267 length of stay (4.5 vs 3 days;  $p = 0.01$ ) when compared to non-exposed patients.  
28  
29  
30  
31  
32

33 268  
34  
35 269 The efficacy of olanzapine in the management of restlessness, irritability, aggression and  
36  
37 270 insomnia in outpatients with a history of TBI was evaluated in a prospective double blind  
38  
39 271 study.<sup>38</sup> While no reduction in restlessness was reported, the authors did report a  
40  
41 272 significant reduction in irritability and insomnia between weeks 1 and 3 in olanzapine-  
42  
43 273 treated patients. Unfortunately, no statistical comparison with the placebo group was  
44  
45 274 provided. The efficacy of valproic acid in reducing agitated behaviors among mild and  
46  
47 275 moderate TBI outpatients was evaluated in an unpublished randomized controlled study  
48  
49 276 ( $n = 50$ ).<sup>37</sup> Patients were included more than one year following brain injury and suffered  
50  
51 277 from both affective lability and alcohol dependence. A significant reduction in the  
52  
53  
54  
55  
56  
57  
58  
59  
60



278 **Table 3 – Efficacy and safety outcomes**

| Study/Year/n                                          | Intervention    | Agitated behavior measures                                                                                                                                   | Efficacy outcomes                                                                                                                                                                                                                  | Safety outcomes                       |
|-------------------------------------------------------|-----------------|--------------------------------------------------------------------------------------------------------------------------------------------------------------|------------------------------------------------------------------------------------------------------------------------------------------------------------------------------------------------------------------------------------|---------------------------------------|
| <b>1. Agitated behavior as the presenting symptom</b> |                 |                                                                                                                                                              |                                                                                                                                                                                                                                    |                                       |
| <i>Randomized controlled studies</i>                  |                 |                                                                                                                                                              |                                                                                                                                                                                                                                    |                                       |
| Brooke <sup>30</sup><br>1992<br>N=21                  | Propranolol     | Overt aggression scale                                                                                                                                       | Significant reduction in maximum intensities of agitation per week (p<0.05). No significant difference in average number of agitation episodes per week. Significant reduction in physical restraint use during the study (p<0.05) | No safety outcomes reported           |
| Mooney 1993 <sup>31</sup><br>N=38                     | Methylphenidate | State-Trait Anger Scale, Belligerence cluster score for the Katz adjustment scale and the Anger-Hostility factor score, Organic Signs and Symptoms Inventory | Significant difference in the comparison of methylphenidate and placebo group on all the anger measures before and after 6 weeks in a multivariate analysis p=0.02).                                                               | No significant effect on side effects |

|                                                                                                          |                                      |               |                                                                                                         |                                                                                                                                                                                                                                                                                                                                                                                                                    |                                                                                                                                  |
|----------------------------------------------------------------------------------------------------------|--------------------------------------|---------------|---------------------------------------------------------------------------------------------------------|--------------------------------------------------------------------------------------------------------------------------------------------------------------------------------------------------------------------------------------------------------------------------------------------------------------------------------------------------------------------------------------------------------------------|----------------------------------------------------------------------------------------------------------------------------------|
| 1<br>2<br>3<br>4<br>5<br>6<br>7<br>8<br>9<br>10<br>11<br>12<br>13<br>14                                  | Yablon 2010 <sup>32</sup><br>N=79    | Amantadine    | Confusion<br>assessment protocol<br>(CAP)                                                               | No significant differences in the number of symptoms of posttraumatic confusional state as measured by the CAP at 14 days (amantadine 2.56 vs placebo 2.7; p=0.57). Mean difference in time to first "nonconfused" CAP score between groups approached significance (amantadine 7.7 days and placebo 9.3 days; p=0.053)                                                                                            | No patients withdrawn because of safety criteria                                                                                 |
| 15<br>16<br>17<br>18<br>19<br>20<br>21<br>22<br>23<br>24<br>25<br>26<br>27<br>28<br>29                   | Hammond 2014 <sup>34</sup><br>N=76   | Amantadine    | NPI-I most aberrant<br>and most<br>problematic<br>Irritability (NPI-I) and<br>aggressiveness<br>(NPI-A) | Significant reduction in irritability (80.56% improved at least 3 points on the NPI-I, compared with 44.44% in the placebo group; p=0.0016). Mean change in NPI-I was -4.3 in the amantadine group and -2.6 in the placebo group (P = .0085). When excluding individuals with minimal to no baseline aggression, mean change in NPI-A was -4.56 in the amantadine group and -2.46 in the placebo group (P = .046). | No difference in adverse events (tremors, appetite, gastrointestinal, aches and pain, sexual problems, disorientation, seizures) |
| 30<br>31<br>32<br>33<br>34<br>35<br>36<br>37<br>38<br>39<br>40<br>41<br>42<br>43<br>44<br>45<br>46<br>47 | Beresford 2015 <sup>30</sup><br>N=50 | Valproic acid | Agitated Behavior<br>Scale by spouse or<br>significant other                                            | Significant others' weekly Agitated Behavior Scale ratings were statistically lower, indicating less agitation in the valproic acid group, 12.9 +/- 4.9, than in the placebo group, 15.5 +/- 6.6, with significance at p=0.0367.                                                                                                                                                                                   | No safety outcomes reported                                                                                                      |

1  
2  
3  
4  
5  
6  
7  
8  
9  
10  
11  
12  
13  
14  
15  
16  
17  
18  
19  
20  
21  
22  
23  
24  
25  
26  
27  
28  
29  
30  
31  
32  
33  
34  
35  
36  
37  
38  
39  
40  
41  
42  
43  
44  
45  
46  
47

|                                                        |            |                                                                                                                                        |                                                                                                                                                                                                                                                                                                                               |                                                                                  |
|--------------------------------------------------------|------------|----------------------------------------------------------------------------------------------------------------------------------------|-------------------------------------------------------------------------------------------------------------------------------------------------------------------------------------------------------------------------------------------------------------------------------------------------------------------------------|----------------------------------------------------------------------------------|
| Hammond 2015 <sup>33</sup><br><br>N=168                | Amantadine | NPI-I most problematic by observer and by patient. Global improvement subscale of the Clinical Global Impressions (CGI) by physicians. | Observer ratings were not different at day 28 or 60. Participants rating at day 60 showed improvement in NPI-I most problematic (p<0.04; but NS for when adjusted for multiple comparisons). Physician's assessment of global improvement improved more in the amantadine group than the placebo group at 60 days (p=0.0354). | Well tolerated with no significant differences in adverse events between groups. |
| <i>Observational studies</i>                           |            |                                                                                                                                        |                                                                                                                                                                                                                                                                                                                               |                                                                                  |
| Maturana Waidele <sup>37</sup><br><br>2009<br><br>N=31 | Olanzapine | Restlessness, irritability, aggressiveness and insomnia. No tool mentioned.                                                            | Reduction in irritability (p<0.001), aggressiveness (p=0.008) and insomnia (p=-.0011) between weeks 1 and 3 in the patients treated with olanzapine                                                                                                                                                                           | No safety outcomes reported                                                      |
| Gramish 2017 <sup>35</sup><br><br>N=139                | Amantadine | RASS score of +2 or higher                                                                                                             | Increase in agitation in patients exposed to amantadine (38%) compared to non-exposed (14%);                                                                                                                                                                                                                                  | No safety outcomes reported                                                      |

|                                                           |            |                                                                                              |                                                                                                                                                                      |                                                                                    |
|-----------------------------------------------------------|------------|----------------------------------------------------------------------------------------------|----------------------------------------------------------------------------------------------------------------------------------------------------------------------|------------------------------------------------------------------------------------|
|                                                           |            |                                                                                              | p=0.018. Increase in median ICU length of stay (4.5 vs 3 days; p=0.01). Median hospital length of stay was non-significantly increased (14 days vs 10 days; p=0.051) |                                                                                    |
| <b>2. Agitated behavior is not the presenting symptom</b> |            |                                                                                              |                                                                                                                                                                      |                                                                                    |
| <i>Randomized controlled studies</i>                      |            |                                                                                              |                                                                                                                                                                      |                                                                                    |
| Schneider 1999 <sup>41</sup><br>N=10                      | Amantadine | Neurobehavioral rating scale                                                                 | No significant difference in behavior scores between amantadine and placebo groups                                                                                   | No safety outcomes reported                                                        |
| Meythaler 2001 <sup>40</sup><br>N=9                       | Sertraline | Agitated Behavior Scale                                                                      | No difference in decline of ABS over treatment period                                                                                                                | No safety outcomes reported                                                        |
| Meythaler 2002 <sup>42</sup><br>N=35                      | Amantadine | Agitated Behavior Scale                                                                      | There were no statistically significant changes or trends in the ABS during the first 6 weeks or the second 6 weeks of the study (P> .05, Mann–Whitney U test)       | No detrimental effects in hematology or biochemistry laboratories and no seizures. |
| Banos 2010 <sup>38</sup><br>N=99                          | Sertraline | Aggression self-report and family report according to the Neurobehavioral Function Inventory | No significant differences between sertraline and placebo in patient self-report and family report.                                                                  | No safety outcomes reported                                                        |

1  
2  
3  
4  
5  
6  
7  
8  
9  
10  
11  
12  
13  
14  
15  
16  
17  
18  
19  
20  
21  
22  
23  
24  
25  
26  
27  
28  
29  
30  
31  
32  
33  
34  
35  
36  
37  
38  
39  
40  
41  
42  
43  
44  
45  
46  
47

|                                                                     |                          |                                                                      |                                                                                                                                                                                                                                                          |                                                                                                                                                                                                       |
|---------------------------------------------------------------------|--------------------------|----------------------------------------------------------------------|----------------------------------------------------------------------------------------------------------------------------------------------------------------------------------------------------------------------------------------------------------|-------------------------------------------------------------------------------------------------------------------------------------------------------------------------------------------------------|
| <p>Giacino 2012<sup>39</sup><br/>N=184</p>                          | <p>Amantadine</p>        | <p>Agitation and restlessness not further defined</p>                | <p>A total of 12/87 (14%) patients and 11/97 (11%) patients exposed to amantadine and placebo developed agitation (p=NS) over the 4-week period. Restlessness was reported in 8% and 9% of patients exposed to amantadine and placebo, respectively.</p> | <p>No differences in adverse events (seizure, nausea, vomiting, constipation, diarrhea, elevated liver function tests, insomnia, rash, congestive heart failure, involuntary muscle contractions)</p> |
| <p>Tramontana 2014<br/>N=22 but 13 patients completed the study</p> | <p>Lisdexamphetamine</p> | <p>Agitation and restlessness not further defined</p>                | <p>No difference in agitation (no cases in each group) or irritability (1/13 case) during placebo) between the Lisdexamphetamine and placebo groups.</p>                                                                                                 | <p>Reduced appetite and weight loss of more than 5 lbs more frequent with lisdexamphetamine (7 vs 1 case) p=NS</p>                                                                                    |
| <p>Johansson 2014<br/>N=48</p>                                      | <p>Methylphenidate</p>   | <p>Aggression, restlessness and irritability not further defined</p> | <p>No difference in aggression, restlessness and irritability in patients treated with methylphenidate</p>                                                                                                                                               | <p>A significant increase in heart rate was found. No significant changes were found in blood pressure or QT intervals.</p>                                                                           |
| <p>Fann 2017<br/>N=62</p>                                           | <p>Sertraline</p>        | <p>Brief Anger and Aggression Scale</p>                              | <p>No difference in the Anger and Aggression Scale. More patients developed agitation/restlessness in the sertraline group (17%) vs the placebo group (7%) p=0.42</p>                                                                                    | <p>No significant difference in safety outcomes. More patients in the sertraline group (17%)</p>                                                                                                      |

|                   |                   |                                                      |                                                                                        |                                                                |
|-------------------|-------------------|------------------------------------------------------|----------------------------------------------------------------------------------------|----------------------------------------------------------------|
|                   |                   | and<br>agitation/restlessness<br>not further defined |                                                                                        | developed gas/flatulence vs the<br>placebo group (0%) p=0.052. |
| Hart 2017<br>N=32 | Dextroamphetamine | Agitated Behavior<br>Scale                           | Increase in agitation with dextroamphetamine over<br>time compared to placebo (p<0.05) | No significant difference in heart<br>rate or blood pressure.  |

For peer review only

1  
2  
3 280 agitated behavior scores (ABS) evaluated by family members at eight weeks (12.9 vs 15.5  
4  
5 281 points;  $p=0.03$ ) was observed. Finally, a crossover study assessed methylphenidate for  
6  
7 282 anger ( $n=38$ ) in TBI rehabilitation center outpatients (six months or more after TBI). After  
8  
9  
10 283 six weeks, methylphenidate significantly reduced the anger score using the State Trait  
11  
12 284 Anger Scale (STAS).<sup>32</sup>

13  
14 285  
15  
16  
17 286 Of the eight studies, safety outcomes were reported in four studies.<sup>32-35</sup> When reported,  
18  
19 287 the agents studied were well tolerated with no significant differences observed. Functional  
20  
21 288 and cognitive outcomes were not reported in any of these studies.

### 22 23 24 289 25 26 290 *Agitated behavior as a secondary measure*

27  
28 291  
29 292 We identified nine studies evaluating agitated behaviors as a secondary measure, which  
30  
31 293 were focused on cognitive function and neurological recovery (Table 1).<sup>39-47</sup> In these  
32  
33 294 studies, sertraline<sup>39, 41, 45</sup>, amantadine<sup>40, 42, 43</sup>, amphetamines<sup>44, 47</sup>, and methylphenidate<sup>46</sup>  
34  
35 295 were evaluated versus placebo and reported agitated behaviors as an outcome. Of these  
36  
37 296 studies, 6 used a randomized crossover design and 3 used a randomized controlled  
38  
39 297 parallel design.

40  
41 298  
42  
43  
44  
45 299 Sertraline was evaluated in three studies to enhance recovery and increase arousal,  
46  
47 300 ameliorate cognitive and neurobehavioral functioning and to treat major depression (Table  
48  
49 301 3).<sup>39, 41, 45</sup> In all these three studies, sertraline had no effect on the incidence of agitation,  
50  
51 302 anger or aggression. In one study, more patients developed agitation/restlessness in the  
52  
53 303 sertraline group (17%) compared to the placebo group (7%) but this difference was not  
54  
55  
56  
57  
58  
59  
60

1  
2  
3 304 statistically significant ( $p=0.42$ ).<sup>45</sup> Amantadine was also evaluated in three studies for  
4  
5 305 cognitive and functional recovery.<sup>40, 42, 43</sup> All three studies found no differences in agitated  
6  
7 306 behaviors compared to placebo. Methylphenidate was evaluated for secondary mental  
8  
9 307 fatigue in mild TBI patients more than six months after injury.<sup>46</sup> However, it had no effect  
10  
11 308 on irritability and aggression. Lisdexamphetamine and dextroamphetamine were each  
12  
13 309 evaluated for attention deficits in TBI patients and no effect on agitated behaviors was  
14  
15 310 noted with lisdexamphetamine whereas dextroamphetamine increased agitation over time  
16  
17 311 ( $p<0.05$ ).<sup>44, 47</sup> Among these 9 studies, those evaluating sertraline and amantadine  
18  
19 312 reported no significant differences in adverse events.<sup>39-43, 45</sup>  
20  
21  
22  
23  
24  
25

#### 26 314 *Studies evaluating safety outcomes*

27  
28 315 Finally, the safety of pharmacological agents used for agitated behaviors in TBI patients  
29  
30 316 was evaluated in four retrospective observational studies (Table 4).<sup>48-51</sup> Two of these  
31  
32 317 studies focused on the effect of haloperidol and antipsychotic use on post-traumatic  
33  
34 318 amnesia (PTA) duration, whereas a third evaluated the effects of antipsychotics,  
35  
36 319 benzodiazepines and narcotics on PTA duration, and Functional independence measure  
37  
38 320 (FIM) cognitive and motor scores.<sup>49-51</sup> In these three studies, haloperidol and other  
39  
40 321 antipsychotics were associated with an increase in PTA duration. Antipsychotics,  
41  
42 322 benzodiazepines and narcotics had no effects on FIM scores.<sup>49</sup> Finally a fourth study  
43  
44 323 focused on the general safety (seizures, neuroleptic malignant syndrome, QTc  
45  
46 324 prolongation, extrapyramidal symptoms, hematologic disturbances) of haloperidol in ICU  
47  
48 325 TBI patients.<sup>48</sup> Patients exposed to haloperidol ( $n=45$ ) had no significant increase in  
49  
50 326 adverse events compared to non-exposed patients ( $n=56$ ). Of note, none of the studies  
51  
52 327 adjusted for severity of TBI and other potential confounders.  
53  
54  
55  
56  
57  
58  
59  
60



1  
2  
3 328  
4  
5 329 *Risk of bias assessment*  
6  
7  
8 330 Risk of bias scores are reported in Table 5. The analysis of risk of bias of randomized  
9  
10 331 controlled trials with the Cochrane Collaboration's Tool revealed that many studies did not  
11  
12 332 provide sufficient information on sequence, generation and allocation concealment. A  
13  
14 333 majority of studies had other threats to validity including limited sample sizes, no  
15  
16  
17 334 description of patient demographics and loss to follow-up. For six studies evaluated with  
18  
19 335 the Newcastle-Ottawa tool, the number of stars awarded ranged from four to five. Most  
20  
21 336 studies were awarded a score of four stars, indicating a high risk of bias. As none of the  
22  
23  
24 337 six studies were adjusted for potential confounding, all received 0 stars for comparability.  
25

26 338

27  
28 339

29  
30 340

31  
32 341

33  
34 342

35  
36 343

37  
38 344

39  
40 345  
41  
42  
43  
44  
45  
46  
47  
48  
49  
50  
51  
52  
53  
54  
55  
56  
57  
58  
59  
60

346 **Table 4 - Studies assessing the safety of pharmacological agents used for agitated behaviors in TBI**

| Study/Year/n           | Drugs studied                                     | Results                                                                                                                                                                                                                                                                                                                                                                                                                                                                                                     |
|------------------------|---------------------------------------------------|-------------------------------------------------------------------------------------------------------------------------------------------------------------------------------------------------------------------------------------------------------------------------------------------------------------------------------------------------------------------------------------------------------------------------------------------------------------------------------------------------------------|
| Rao 1985<br>N=26       | Haloperidol                                       | Twenty-five patients exhibited agitation and 11 patients required haloperidol. In an unadjusted analysis, the haloperidol patients have a significantly longer period (8 vs 4 weeks; $p < 0.03$ ) of post-traumatic amnesia (PTA).                                                                                                                                                                                                                                                                          |
| Mysiw<br>2006<br>N=182 | Narcotics,<br>benzodiazepines and<br>neuroleptics | Narcotics, benzodiazepines and neuroleptics had no effect on the Function Independence Measures (FIM) motor and independence scores. In an unadjusted analysis, narcotics and neuroleptics increased duration of PTA by more than 7 days ( $p < 0.01$ ).                                                                                                                                                                                                                                                    |
| Kooda<br>2015<br>N=195 | Antipsychotics                                    | Fifty-two patients received antipsychotics (26.7%) within 7 days of TBI, mostly quetiapine. In an unadjusted analysis, duration of PTA was significantly longer (19.6 vs 12.3 days; $p = 0.013$ ) in patients treated with antipsychotics.                                                                                                                                                                                                                                                                  |
| Anderson 2016<br>N=101 | Haloperidol                                       | In an unadjusted analysis, there was no significant increase in adverse events (QT prolongation, seizures, neuroleptic malignant syndrome, extrapyramidal symptoms, or hematologic disturbances) associated with haloperidol use. Patients in the haloperidol group who developed complications received a higher mean daily dose [ $p = 0.013$ ]. There was no difference in length of mechanical ventilation but the haloperidol group had a longer hospital length of stay (22 vs 11 days; $p < 0.001$ ) |

347

348 **Table 5 – Risk of bias assessment**

349

|                                        |
|----------------------------------------|
| <b>1. Randomized controlled trials</b> |
|----------------------------------------|

1  
2  
3  
4  
5  
6  
7  
8  
9  
10  
11  
12  
13  
14  
15  
16  
17  
18  
19  
20  
21  
22  
23  
24  
25  
26  
27  
28  
29  
30  
31  
32  
33  
34  
35  
36  
37  
38  
39  
40  
41  
42  
43  
44  
45  
46  
47

| Cochrane Collaboration Tool Risk of bias items |                     |            |                                        |                                |              |                     |                           |
|------------------------------------------------|---------------------|------------|----------------------------------------|--------------------------------|--------------|---------------------|---------------------------|
| Study (year)                                   | Sequence generation | Allocation | Blinding of participants and personnel | Blinding of outcome assessment | Outcome data | Selective reporting | Other threats to validity |
| Brooke 1992                                    | U                   | U          | L                                      | L                              | L            | L                   | H                         |
| Mooney 1993                                    | U                   | U          | L                                      | H                              | L            | U                   | H                         |
| Schneider 1999                                 | U                   | U          | U                                      | U                              | H            | L                   | H                         |
| Meythaler 2001                                 | U                   | U          | L                                      | L                              | U            | U                   | H                         |
| Meythaler 2002                                 | U                   | U          | U                                      | U                              | L            | H                   | H                         |
| Banos 2010                                     | U                   | U          | L                                      | L                              | L            | L                   | H                         |
| Yablon 2010                                    | U                   | U          | L                                      | L                              | L            | U                   | H                         |
| Giacino 2012                                   | U                   | L          | L                                      | L                              | L            | L                   | L                         |

|                 |   |   |   |   |   |   |   |
|-----------------|---|---|---|---|---|---|---|
| Hammond 2014    | L | L | L | L | U | L | L |
| Tramontana 2014 | H | H | L | L | H | L | H |
| Johansson 2014  | U | H | H | H | H | L | H |
| Beresford 2015  | U | U | L | L | H | L | H |
| Hammond 2015    | L | L | L | L | U | L | L |
| Fann 2017       | L | L | L | L | L | L | H |
| Hart 2017       | U | U | L | L | L | L | L |

**2. Observational studies**

|              |                                           |  |                            |  |                      |  |
|--------------|-------------------------------------------|--|----------------------------|--|----------------------|--|
| Study (year) | Newcastle-Ottawa Quality Assessment Scale |  |                            |  |                      |  |
|              | Number of stars awarded                   |  |                            |  |                      |  |
|              | Selection <sup>a</sup>                    |  | Comparability <sup>b</sup> |  | Outcome <sup>c</sup> |  |
| Rao 1985     | **                                        |  |                            |  | **                   |  |

1  
2  
3  
4  
5  
6  
7  
8  
9  
10  
11  
12  
13  
14  
15  
16  
17  
18  
19  
20  
21  
22  
23  
24  
25  
26  
27  
28  
29  
30  
31  
32  
33  
34  
35  
36  
37  
38  
39  
40  
41  
42  
43  
44  
45  
46  
47

|                          |     |  |     |
|--------------------------|-----|--|-----|
| Maturana Waidele<br>2009 | **  |  | **  |
| Mysiw 2006               | **  |  | *** |
| Kooda 2015               | **  |  | **  |
| Anderson 2016            | **  |  | **  |
| Gramish 2017             | *** |  | *   |

350 For Cochrane Collaboration's Tool:

351 H, high risk of bias; L, low risk of bias; U, unclear risk of bias

352

353 For Newcastle-Ottawa Quality Assessment Scale :

354 <sup>a</sup> Maximum 4 stars

355 <sup>b</sup> Maximum 2 stars

356 <sup>c</sup> Maximum 3 stars.

357 N/A : not applicable

For peer review only

## 358 Discussion

359 In this systematic review, we used an exhaustive search strategy and included studies  
360 directly or indirectly evaluating pharmacological agents for the management of TBI-  
361 associated agitated behaviors as well as studies assessing the safety of pharmacological  
362 agents used for these agitated behaviors. Despite the prevalence and importance of this  
363 problem, we found a limited number of studies evaluating pharmacological interventions  
364 for the management of agitated behaviors. Propranolol, methylphenidate, valproic acid  
365 and olanzapine were the only agents suggesting a potential benefit in reducing agitation,  
366 anger or irritability.<sup>31, 32, 37, 38</sup> However, the studies evaluating these agents had limited  
367 sample sizes, heterogeneous patient populations and an unclear risk of bias. Amantadine  
368 showed mixed results whereas sertraline, lysdexamphetamine and dextroamphetamine  
369 showed no benefits. In comparison to the two most recent systematic reviews, we used a  
370 more rigorous and broader search strategy. As such, we restricted our search to  
371 randomized controlled, quasi-experimental, and observational studies with control groups  
372 that had a majority (>50%) of patients with TBI, thus excluding case reports, case series  
373 and uncontrolled observational studies. Our updated and broadened literature search  
374 enabled the identification of two additional studies from the grey literature, three recently  
375 published studies and one non-English study.<sup>24, 25, 33, 36, 37, 45, 47</sup> Our search strategy also  
376 included studies evaluating agitated behaviors as a secondary measure and identified 9  
377 more studies, thus adding to previous systematic reviews. Furthermore, we included  
378 studies where the safety of pharmacological agents for the management of agitated  
379 behaviors was assessed and identified four such studies.

380

1  
2  
3 381 The use of beta-blockers in patients with organic brain disease and assaultive behaviors  
4  
5 382 or impulsivity has been previously studied in three crossover-randomized trials with some  
6  
7 383 efficacy but TBI represented less than 50% of the total patient population.<sup>62-64</sup> In the study  
8  
9  
10 384 presented in this review, propranolol reduced the intensity of agitation but not the  
11  
12 385 frequency.<sup>31</sup> One important finding was a reduction in the use of physical restraints.  
13  
14 386 Unfortunately, safety measures such as hypotension and bradycardia were not reported.  
15  
16  
17 387 The Canadian ABIKUS guidelines have recommended beta-blockers for the treatment of  
18  
19 388 aggression following TBI.<sup>66</sup>  
20  
21 389 Although numerous observational studies have reported a reduction in agitation with the  
22  
23 390 use of antipsychotic agents, we found no controlled studies evaluating the efficacy of  
24  
25 391 antipsychotics other than olanzapine.<sup>67-69</sup> In a previous systematic review that included  
26  
27 392 case reports and case series evaluating antipsychotics, Lanthier et al. identified 7 articles  
28  
29 393 that included a total of 52 patients.<sup>24</sup> The lack of a control group excluded these studies  
30  
31 394 from our review. The only study we included that used olanzapine didn't report a reduction  
32  
33 395 in restlessness but did suggest a reduction in irritability.<sup>38</sup> Its interpretation is greatly limited  
34  
35 396 given the poor description of methods and a lack of statistical comparison with the placebo  
36  
37 397 group. The four studies assessing safety all evaluated antipsychotic agents and  
38  
39 398 suggested a potential risk of prolonged PTA in unadjusted analyses.<sup>48-51</sup> None of the  
40  
41 399 studies controlled for potential confounders such as severity of TBI. Although pre-clinical  
42  
43 400 studies have suggested a reduction in cognitive and motor recovery with repeated  
44  
45 401 administration of haloperidol and risperidone, the one study evaluating cognitive and  
46  
47 402 motor scores reported no significant association with antipsychotic use.<sup>19-21, 49, 70</sup> In light  
48  
49 403 of these results, both the International Cognitive (INCOG), the Canadian ABIKUS  
50  
51 404 guidelines and the French Society of Physical and Rehabilitation Medicine (SOFMER)

1  
2  
3 405 guidelines have advised against the use of antipsychotics in TBI patients with agitated  
4  
5 406 behaviors.<sup>24, 66, 71</sup> Paradoxically, observational studies have suggested antipsychotics are  
6  
7 407 frequently used for the management of agitated behaviors.<sup>14, 72-74</sup>  
8  
9

10 408  
11  
12 409 Anticonvulsants are clinically used as mood stabilizers in bipolar affective disorder and  
13  
14 410 have also been used in TBI-associated agitation.<sup>75, 76</sup> Case series have reported a  
15  
16 411 reduction in agitation and aggressive behaviors with the use of valproic acid and  
17  
18 412 carbamazepine but were uncontrolled.<sup>77-81</sup> We identified one unpublished study of TBI  
19  
20 413 patients with affective lability and alcohol dependence where valproic acid showed  
21  
22 414 effectiveness in reducing weekly ABS rated by spouse or significant other's.  
23  
24 415 Unfortunately, the abstract provided no information on the onset of effect or adverse  
25  
26 416 events associated with its use.  
27  
28  
29

30 417  
31  
32 418 Amantadine increases dopaminergic neurotransmission and has been shown to increase  
33  
34 419 the rate of neurological recovery in severe TBI.<sup>40</sup> In the 4 studies that evaluated  
35  
36 420 amantadine for irritability, agitation or aggressiveness, results were variable.<sup>33-36</sup> Although  
37  
38 421 one study suggested a reduction in irritability in outpatients, a larger study by the same  
39  
40 422 group failed to confirm these results.<sup>34, 35</sup> Interestingly, a recent observational study of  
41  
42 423 patients exposed to amantadine in the ICU reported an increased risk of agitation.<sup>36</sup>  
43  
44 424 Although these effects were not observed in a multicenter trial that started amantadine at  
45  
46 425 least four weeks after TBI, the early use of amantadine in the ICU may explain these  
47  
48 426 findings.<sup>36, 40</sup> However, these results were uncontrolled and confounding may also explain  
49  
50 427 these differences. In addition, the use of amantadine may have increased arousal and the  
51  
52 428 agitation measured may be part of the natural recovery. In studies in which agitation was  
53  
54  
55  
56  
57  
58  
59



1  
2  
3 429 not the presenting symptom, no significant differences in behavior scores between  
4  
5 430 amantadine and control groups were reported.<sup>40, 42, 43</sup>  
6  
7

8 431  
9  
10 432 In this review, we found no comparative studies assessing the efficacy of tricyclic  
11  
12 433 antidepressants, dexmedetomidine or benzodiazepines. We also found no studies in  
13  
14 434 children. A search of TBI-associated agitation studies in clinical trial registries revealed  
15  
16  
17 435 ongoing studies with the combination of dextromethorphan and quinidine  
18  
19 436 (ClinicalTrials.gov: NCT03095066) as well as propranolol and clonidine  
20  
21 437 (ClinicalTrials.gov: NCT01322048).<sup>82</sup> Finally, in a recent observational study on the  
22  
23  
24 438 predictors of agitation in TBI rehabilitation, sodium channel antagonist anticonvulsants,  
25  
26 439 second-generation antipsychotics, and gamma-aminobutyric acid anxiolytics were  
27  
28 440 associated with more severe agitation.<sup>14</sup> Although indication bias and residual  
29  
30  
31 441 confounding are probable, these results do suggest an association between suppression  
32  
33 442 of cognition and more agitation.  
34

35 443  
36  
37 444 Strengths of this study include an exhaustive search of the literature in the adult and  
38  
39 445 pediatric populations, including grey literature and no language limitation. A risk of bias  
40  
41  
42 446 assessment was performed for each included study. Limits of this study include the  
43  
44  
45 447 presence of significant heterogeneity, variations in the different agitated behaviors  
46  
47 448 (agitation, irritability, and aggression) and populations (acute TBI, rehabilitation,  
48  
49 449 outpatient) evaluated, preventing the authors from proceeding to a meta-analysis. In  
50  
51 450 addition, very little studies reported length of stay and functional outcomes.  
52

53  
54 451

## 55 56 452 **Conclusion**

57  
58  
59  
60

1  
2  
3 453 In conclusion, there are insufficient data to recommend the use of any medications for the  
4  
5 454 management of agitation following TBI. Propranolol, methylphenidate, valproic acid and  
6  
7 455 olanzapine may offer some benefit, however, they need to be further studied. The use of  
8  
9 456 amantadine in the acutely ill may increase the risk of agitation whereas antipsychotics  
10  
11 457 may prolong post-traumatic amnesia. More studies on tailored interventions and  
12  
13 458 continuous evaluation throughout the acute, rehabilitation and outpatient settings are  
14  
15 459 needed to assess the efficacy and safety of pharmacological agents for the management  
16  
17 460 of agitated behaviours in both the adult and pediatric TBI populations. In addition, there is  
18  
19 461 a need to better define and standardize the assessment of agitated behaviors. Newer  
20  
21 462 agents such as dexmedetomidine should also be evaluated.  
22  
23  
24  
25  
26  
27

463

## 464 **Acknowledgements**

30  
31 465 We thank M. Patrice Dupont, librarian at the Université de Montréal for his expertise  
32  
33 466 and help with the literature search strategies.  
34

## 35 467 **Figure 1: Prisma Flow Diagram**

## 36 468 **References**

- 37  
38  
39  
40 469 1. Rubiano AM, Carney N, Chesnut R, Puyana JC. Global neurotrauma research  
41 470 challenges and opportunities. *Nature* 2015;527:S193-197.  
42 471 2. Corrigan JD, Selassie AW, Orman JA. The epidemiology of traumatic brain injury. *J*  
43 472 *Head Trauma Rehabil* 2010;25:72-80.  
44 473 3. Chen A, Bushmeneva K, Zagorski B, Colantonio A, Parsons D, Wodchis WP. Direct cost  
45 474 associated with acquired brain injury in Ontario. *BMC neurology* 2012;12:76.  
46 475 4. Tuominen R, Joelsson P, Tenovuo O. Treatment costs and productivity losses caused  
47 476 by traumatic brain injuries. *Brain Inj* 2012;26:1697-1701.  
48 477 5. Ciurli P, Formisano R, Bivona U, Cantagallo A, Angelelli P. Neuropsychiatric disorders  
49 478 in persons with severe traumatic brain injury: prevalence, phenomenology, and  
50 479 relationship with demographic, clinical, and functional features. *J Head Trauma Rehabil*  
51 480 2011;26:116-126.  
52  
53  
54  
55  
56  
57  
58  
59  
60

- 1  
2  
3 481 6. van der Naalt J, van Zomeren AH, Sluiter WJ, Minderhoud JM. Acute behavioural  
4 482 disturbances related to imaging studies and outcome in mild-to-moderate head injury.  
5 483 *Brain Inj* 2000;14:781-788.
- 6 484 7. Sandel ME, Mysiw WJ. The agitated brain injured patient. Part 1: Definitions,  
7 485 differential diagnosis, and assessment. *Archives of physical medicine and rehabilitation*  
8 486 1996;77:617-623.
- 9 487 8. Kadyan V, Mysiw WJ, Bogner JA, Corrigan JD, Fugate LP, Clinchot DM. Gender  
10 488 differences in agitation after traumatic brain injury. *American journal of physical medicine*  
11 489 & rehabilitation / Association of Academic Physiatrists 2004;83:747-752.
- 12 490 9. Weir N, Doig EJ, Fleming JM, Wiemers A, Zemljic C. Objective and behavioural  
13 491 assessment of the emergence from post-traumatic amnesia (PTA). *Brain Inj* 2006;20:927-  
14 492 935.
- 15 493 10. Singh R, Venkateshwara G, Nair KP, Khan M, Saad R. Agitation after traumatic brain  
16 494 injury and predictors of outcome. *Brain Inj* 2014;28:336-340.
- 17 495 11. Nott MT, Chapparo C, Baguley IJ. Agitation following traumatic brain injury: an  
18 496 Australian sample. *Brain Inj* 2006;20:1175-1182.
- 19 497 12. Bogner JA, Corrigan JD, Fugate L, Mysiw WJ, Clinchot D. Role of agitation in  
20 498 prediction of outcomes after traumatic brain injury. *American journal of physical medicine*  
21 499 & rehabilitation / Association of Academic Physiatrists 2001;80:636-644.
- 22 500 13. Wolffbrandt MM, Poulsen I, Engberg AW, Hornnes N. Occurrence and severity of  
23 501 agitated behavior after severe traumatic brain injury. *Rehabil Nurs* 2013;38:133-141.
- 24 502 14. Bogner J, Barrett RS, Hammond FM, et al. Predictors of Agitated Behavior During  
25 503 Inpatient Rehabilitation for Traumatic Brain Injury. *Archives of physical medicine and*  
26 504 *rehabilitation* 2015;96:S274-S281 e274.
- 27 505 15. McNett M, Sarver W, Wilczewski P. The prevalence, treatment and outcomes of  
28 506 agitation among patients with brain injury admitted to acute care units. *Brain Inj*  
29 507 2012;26:1155-1162.
- 30 508 16. Brooke MM, Questad KA, Patterson DR, Bashak KJ. Agitation and restlessness after  
31 509 closed head injury: a prospective study of 100 consecutive admissions. *Archives of physical*  
32 510 *medicine and rehabilitation* 1992;73:320-323.
- 33 511 17. Hammond FM, Barrett RS, Shea T, et al. Psychotropic Medication Use During  
34 512 Inpatient Rehabilitation for Traumatic Brain Injury. *Archives of physical medicine and*  
35 513 *rehabilitation* 2015;96:S256-S273 e214.
- 36 514 18. Williamson DR, Frenette AJ, Burry L, et al. Pharmacological interventions for  
37 515 agitation in patients with traumatic brain injury. *Crit Care* 2018;22(Suppl 1):P376.
- 38 516 19. Hoffman AN, Cheng JP, Zafonte RD, Kline AE. Administration of haloperidol and  
39 517 risperidone after neurobehavioral testing hinders the recovery of traumatic brain injury-  
40 518 induced deficits. *Life sciences* 2008;83:602-607.
- 41 519 20. Kline AE, Hoffman AN, Cheng JP, Zafonte RD, Massucci JL. Chronic administration of  
42 520 antipsychotics impede behavioral recovery after experimental traumatic brain injury.  
43 521 *Neuroscience letters* 2008;448:263-267.
- 44 522 21. Kline AE, Massucci JL, Zafonte RD, Dixon CE, DeFeo JR, Rogers EH. Differential effects  
45 523 of single versus multiple administrations of haloperidol and risperidone on functional  
46 524 outcome after experimental brain trauma. *Crit Care Med* 2007;35:919-924.

- 1  
2  
3 525 22. Phelps TI, Bondi CO, Ahmed RH, Olugbade YT, Kline AE. Divergent long-term  
4 526 consequences of chronic treatment with haloperidol, risperidone, and bromocriptine on  
5 527 traumatic brain injury-induced cognitive deficits. *Journal of neurotrauma* 2015;32:590-597.  
6 528 23. Fleminger S, Greenwood RJ, Oliver DL. Pharmacological management for agitation  
7 529 and aggression in people with acquired brain injury. *The Cochrane database of systematic*  
8 530 *reviews* 2006:CD003299.  
9 531 24. Plantier D, Luaute J, group S. Drugs for behavior disorders after traumatic brain  
10 532 injury: Systematic review and expert consensus leading to French recommendations for  
11 533 good practice. *Ann Phys Rehabil Med* 2016;59:42-57.  
12 534 25. Mehta S, McIntyre A, Janzen S, Iruthayarajah J, Bateman A, Teasell R.  
13 535 Pharmacological management of agitation among individuals with moderate to severe  
14 536 acquired brain injury: A systematic review. *Brain Inj* 2018;32:287-296.  
15 537 26. Williamson DR, Frenette AJ, Burry L, et al. Pharmacological interventions for  
16 538 agitation in patients with traumatic brain injury: protocol for a systematic review and meta-  
17 539 analysis. *Syst Rev* 2016;5:193.  
18 540 27. Moher D, Liberati A, Tetzlaff J, Altman DG, Group P. Preferred reporting items for  
19 541 systematic reviews and meta-analyses: the PRISMA Statement. *Open Med* 2009;3:e123-130.  
20 542 28. McGowan J, Sampson M, Salzwedel DM, Cogo E, Foerster V, Lefebvre C. PRESS Peer  
21 543 Review of Electronic Search Strategies: 2015 Guideline Statement. *Journal of clinical*  
22 544 *epidemiology* 2016;75:40-46.  
23 545 29. Higgins JP, Altman DG, Gotzsche PC, et al. The Cochrane Collaboration's tool for  
24 546 assessing risk of bias in randomised trials. *Bmj* 2011;343:d5928.  
25 547 30. Wells G, Shea B, O'Connell D, et al. The Newcastle-Ottawa Scale (NOS) for assessing  
26 548 the quality of nonrandomised studies in meta-analyses.  
27 549 [http://www.ohri.ca/programs/clinical\\_epidemiology/oxford.asp](http://www.ohri.ca/programs/clinical_epidemiology/oxford.asp). 2013.  
28 550 31. Brooke MM, Patterson DR, Questad KA, Cardenas D, Farrel-Roberts L. The treatment  
29 551 of agitation during initial hospitalization after traumatic brain injury. *Archives of physical*  
30 552 *medicine and rehabilitation* 1992;73:917-921.  
31 553 32. Mooney GF, Haas LJ. Effect of methylphenidate on brain injury-related anger.  
32 554 *Archives of physical medicine and rehabilitation* 1993;74:153-160.  
33 555 33. Yablon S, Sherer M, Nakase-Richardson R, N T. Amantadine Hydrochloride for  
34 556 Treatment of Symptoms of the  
35 557 Posttraumatic Confusional State: A Randomized, Double-Blind,  
36 558 Placebo-Controlled Trial. *Archives of physical medicine and rehabilitation* 2010;91:E3.  
37 559 34. Hammond FM, Sherer M, Malec JF, et al. Amantadine Effect on Perceptions of  
38 560 Irritability after Traumatic Brain Injury: Results of the Amantadine Irritability Multisite  
39 561 Study. *Journal of neurotrauma* 2015;32:1230-1238.  
40 562 35. Hammond FM, Bickett AK, Norton JH, Pershad R. Effectiveness of amantadine  
41 563 hydrochloride in the reduction of chronic traumatic brain injury irritability and aggression.  
42 564 *J Head Trauma Rehabil* 2014;29:391-399.  
43 565 36. Gramish JA, Kopp BJ, Patanwala AE. Effect of Amantadine on Agitation in Critically Ill  
44 566 Patients With Traumatic Brain Injury. *Clin Neuropharmacol* 2017;40:212-216.  
45 567 37. Beresford T, Schmidt BK, Buchanan J, et al. A double-blind trial of divalproex sodium  
46 568 for affective lability and ethanol use following traumatic brain injury. *APA abstracts* 2015.

- 1  
2  
3 569 38. Maturana Waidele R, Maturana Rodillo R. Control de la agresividad con olanzapina  
4 570 en pacientes post tec / Aggressiveness control using olanzapine in post tbi patients Cienc  
5 571 Trab 2009;31:22-24.
- 6 572 39. Banos JH, Novack TA, Brunner R, Renfroe S, Lin HY, Meythaler J. Impact of early  
7 573 administration of sertraline on cognitive and behavioral recovery in the first year after  
8 574 moderate to severe traumatic brain injury. *J Head Trauma Rehabil* 2010;25:357-361.
- 9 575 40. Giacino JT, Whyte J, Bagiella E, et al. Placebo-controlled trial of amantadine for  
10 576 severe traumatic brain injury. *N Engl J Med* 2012;366:819-826.
- 11 577 41. Meythaler JM, Depalma L, Devivo MJ, Guin-Renfroe S, Novack TA. Sertraline to  
12 578 improve arousal and alertness in severe traumatic brain injury secondary to motor vehicle  
13 579 crashes. *Brain Inj* 2001;15:321-331.
- 14 580 42. Schneider WN, Drew-Cates J, Wong TM, Dombovy ML. Cognitive and behavioural  
15 581 efficacy of amantadine in acute traumatic brain injury: an initial double-blind placebo-  
16 582 controlled study. *Brain Inj* 1999;13:863-872.
- 17 583 43. Meythaler JM, Brunner RC, Johnson A, Novack TA. Amantadine to improve  
18 584 neurorecovery in traumatic brain injury-associated diffuse axonal injury: a pilot double-  
19 585 blind randomized trial. *J Head Trauma Rehabil* 2002;17:300-313.
- 20 586 44. Tramontana MG, Cowan RL, Zald D, Prokop JW, Guillaumondegui O. Traumatic brain  
21 587 injury-related attention deficits: treatment outcomes with lisdexamfetamine dimesylate  
22 588 (Vyvanse). *Brain Inj* 2014;28:1461-1472.
- 23 589 45. Fann JR, Bombardier CH, Temkin N, et al. Sertraline for Major Depression During the  
24 590 Year Following Traumatic Brain Injury: A Randomized Controlled Trial. *J Head Trauma*  
25 591 *Rehabil* 2017;32:332-342.
- 26 592 46. Johansson B, Wentzel AP, Andrell P, Odenstedt J, Mannheimer C, Ronnback L.  
27 593 Evaluation of dosage, safety and effects of methylphenidate on post-traumatic brain injury  
28 594 symptoms with a focus on mental fatigue and pain. *Brain Inj* 2014;28:304-310.
- 29 595 47. Hart T, Whyte J, Watanabe T, Chervoneva I. Effects of dextroamphetamine in  
30 596 subacute traumatic brain injury: A randomized, placebo-controlled pilot study. *Journal of*  
31 597 *neuroscience research* 2017.
- 32 598 48. Anderson RL, Birrer KL, Liu-De Ryke X. Haloperidol Use in Acute Traumatic  
33 599 Brain Injury: A Safety Analysis. *Journal of Intensive and Critical Care* 2016;2:1-6.
- 34 600 49. Mysiw WJ, Bogner JA, Corrigan JD, Fugate LP, Clinchot DM, Kadyan V. The impact of  
35 601 acute care medications on rehabilitation outcome after traumatic brain injury. *Brain Inj*  
36 602 2006;20:905-911.
- 37 603 50. Rao N, Jellinek HM, Woolston DC. Agitation in closed head injury: haloperidol effects  
38 604 on rehabilitation outcome. *Archives of physical medicine and rehabilitation* 1985;66:30-34.
- 39 605 51. Kooda K, Aho J, Weber D, Berown A. The effect of antipsychotic use post-traumatic  
40 606 brain injury on duration of post-traumatic amnesia. *Crit Care Med* 2015;43:289.
- 41 607 52. Cummings JL, Mega M, Gray K, Rosenberg-Thompson S, Carusi DA, Gornbein J. The  
42 608 Neuropsychiatric Inventory: comprehensive assessment of psychopathology in dementia.  
43 609 *Neurology* 1994;44:2308-2314.
- 44 610 53. Corrigan JD. Development of a scale for assessment of agitation following traumatic  
45 611 brain injury. *J Clin Exp Neuropsychol* 1989;11:261-277.
- 46 612 54. Maiuro R, Vitaliano P, Cahn T. A brief measure for the assessment of anger and  
47 613 aggression. *J Interpersonal Violence* 1987;2:166-178.



- 1  
2  
3 614 55. Sherer M, Nakase-Thompson R, Yablon SA, Gontkovsky ST. Multidimensional  
4 615 assessment of acute confusion after traumatic brain injury. *Archives of physical medicine*  
5 616 and rehabilitation 2005;86:896-904.
- 6 617 56. Keith RA, Granger CV, Hamilton BB, Sherwin FS. The functional independence  
7 618 measure: a new tool for rehabilitation. *Adv Clin Rehabil* 1987;1:6-18.
- 8 619 57. Busner J, Targum SD. The clinical global impressions scale: applying a research tool  
9 620 in clinical practice. *Psychiatry (Edgmont)* 2007;4:28-37.
- 10 621 58. Katz M, Lyerly S. Methods of measuring adjustment and social behavior in the  
11 622 community: I. Rationale, description, discrimination validity and scale development. .  
12 623 *Psychol Rep* 1963;13:503-535.
- 13 624 59. Kreutzer J, Seel R, Marwitz J. *The Neurobehavioral Functioning*  
14 625 *Inventory*. : The Psychological Corporation. San Antonio, TX., 1999.
- 15 626 60. Levin HS, High WM, Goethe KE, et al. The neurobehavioural rating scale: assessment  
16 627 of the behavioural sequelae of head injury by the clinician. *J Neurol Neurosurg Psychiatry*  
17 628 1987;50:183-193.
- 18 629 61. Yudofsky SC, Silver JM, Jackson W, Endicott J, Williams D. The Overt Aggression Scale  
19 630 for the objective rating of verbal and physical aggression. *Am J Psychiatry* 1986;143:35-39.
- 20 631 62. Greendyke RM, Berkner JP, Webster JC, Gulya A. Treatment of behavioral problems  
21 632 with pindolol. *Psychosomatics* 1989;30:161-165.
- 22 633 63. Greendyke RM, Kanter DR. Therapeutic effects of pindolol on behavioral  
23 634 disturbances associated with organic brain disease: a double-blind study. *J Clin Psychiatry*  
24 635 1986;47:423-426.
- 25 636 64. Greendyke RM, Kanter DR, Schuster DB, Verstrete S, Wootton J. Propranolol  
26 637 treatment of assaultive patients with organic brain disease. A double-blind crossover,  
27 638 placebo-controlled study. *The Journal of nervous and mental disease* 1986;174:290-294.
- 28 639 65. Hammond FM, Malec JF, Zafonte RD, et al. Potential Impact of Amantadine on  
29 640 Aggression in Chronic Traumatic Brain Injury. *J Head Trauma Rehabil* 2017;32:308-318.
- 30 641 66. Acquired Brain Injury Knowledge Uptake Strategy (ABIKUS) guideline development  
31 642 group. Evidence based recommendations for rehabilitation of moderate to severe acquired  
32 643 brain injury. 2007. [http://www.abiebr.com/pdf/abikus\\_aug\\_07.pdf](http://www.abiebr.com/pdf/abikus_aug_07.pdf) [online].
- 33 644 67. Kim E, Bijlani M. A pilot study of quetiapine treatment of aggression due to traumatic  
34 645 brain injury. *The Journal of neuropsychiatry and clinical neurosciences* 2006;18:547-549.
- 35 646 68. Maryniak O, Manchanda R, Velani A. Methotrimeprazine in the treatment of agitation  
36 647 in acquired brain injury patients. *Brain Inj* 2001;15:167-174.
- 37 648 69. Stanislav SW, Childs A. Evaluating the usage of droperidol in acutely agitated persons  
38 649 with brain injury. *Brain Inj* 2000;14:261-265.
- 39 650 70. Wilson MS, Gibson CJ, Hamm RJ. Haloperidol, but not olanzapine, impairs cognitive  
40 651 performance after traumatic brain injury in rats. *American journal of physical medicine &*  
41 652 *rehabilitation / Association of Academic Physiatrists* 2003;82:871-879.
- 42 653 71. Ponsford J, Janzen S, McIntyre A, et al. INCOG recommendations for management of  
43 654 cognition following traumatic brain injury, part I: posttraumatic amnesia/delirium. *J Head*  
44 655 *Trauma Rehabil* 2014;29:307-320.
- 45 656 72. Pisa FE, Cosano G, Giangreco M, et al. Prescribing practice and off-label use of  
46 657 psychotropic medications in post-acute brain injury rehabilitation centres: a cross-sectional  
47 658 survey. *Brain Inj* 2015;29:508-516.

- 1  
2  
3 659 73. Fugate LP, Spacek LA, Kresty LA, Levy CE, Johnson JC, Mysiw WJ. Measurement and  
4 660 treatment of agitation following traumatic brain injury: II. A survey of the Brain Injury  
5 661 Special Interest Group of the American Academy of Physical Medicine and Rehabilitation.  
6 662 Archives of physical medicine and rehabilitation 1997;78:924-928.  
7  
8 663 74. Perreault M, Talic J, Frenette A, Burry L, Bernard F, Williamson D. Agitation after  
9 664 mild to moderate traumatic brain injury in the intensive care unit. Crit Care 2017;21 (Suppl  
10 665 1):P219.  
11 666 75. Chew E, Zafonte RD. Pharmacological management of neurobehavioral disorders  
12 667 following traumatic brain injury--a state-of-the-art review. Journal of rehabilitation  
13 668 research and development 2009;46:851-879.  
14 669 76. Deb S, Crownshaw T. The role of pharmacotherapy in the management of behaviour  
15 670 disorders in traumatic brain injury patients. Brain Inj 2004;18:1-31.  
16 671 77. Azouvi P, Jokic C, Attal N, Denys P, Markabi S, Bussel B. Carbamazepine in agitation  
17 672 and aggressive behaviour following severe closed-head injury: results of an open trial. Brain  
18 673 Inj 1999;13:797-804.  
19 674 78. Chatham Showalter PE, Kimmel DN. Agitated symptom response to divalproex  
20 675 following acute brain injury. The Journal of neuropsychiatry and clinical neurosciences  
21 676 2000;12:395-397.  
22 677 79. Chatham-Showalter PE. Carbamazepine for combativeness in acute traumatic brain  
23 678 injury. The Journal of neuropsychiatry and clinical neurosciences 1996;8:96-99.  
24 679 80. Wroblewski BA, Joseph AB, Kupfer J, Kalliel K. Effectiveness of valproic acid on  
25 680 destructive and aggressive behaviours in patients with acquired brain injury. Brain Inj  
26 681 1997;11:37-47.  
27 682 81. Kim E, Humaran TJ. Divalproex in the management of neuropsychiatric  
28 683 complications of remote acquired brain injury. The Journal of neuropsychiatry and clinical  
29 684 neurosciences 2002;14:202-205.  
30 685 82. Patel MB, McKenna JW, Alvarez JM, et al. Decreasing adrenergic or sympathetic  
31 686 hyperactivity after severe traumatic brain injury using propranolol and clonidine (DASH  
32 687 After TBI Study): study protocol for a randomized controlled trial. Trials 2012;13:177.  
33 688

### 689 **Contribution statement**

690 DRW, AJF, LB, MMP, EC, FL, MJP, JFG, SM and FB participated in the design, writing of  
691 the the review protocol and contributed to the final manuscript. DW wrote the search  
692 strategy and undertook the literature search. DW, AJF and FB conducted the title and  
693 abstract screening and full article screening for final study inclusion. DRW and AJF  
694 conducted data collection and cleaning, LB, MMP and EC advised on methods and  
695 interpretation of findings.

696

1  
2  
3 697  
4  
5 698  
6  
7 699  
8  
9  
10 700  
11  
12 701  
13  
14 702  
15  
16 703  
17  
18 704  
19  
20 705  
21  
22 706  
23  
24 707  
25  
26 708  
27  
28  
29  
30  
31  
32  
33  
34  
35  
36  
37  
38  
39  
40  
41  
42  
43  
44  
45  
46  
47  
48  
49  
50  
51  
52  
53  
54  
55  
56  
57  
58  
59  
60

For peer review only



1  
2  
3  
4  
5  
6  
7  
8  
9  
10  
11  
12  
13  
14  
15  
16  
17  
18  
19  
20  
21  
22  
23  
24  
25  
26  
27  
28  
29  
30  
31  
32  
33  
34  
35  
36  
37  
38  
39  
40  
41  
42  
43  
44  
45  
46  
47  
48  
49  
50  
51  
52  
53  
54  
55  
56  
57  
58  
59  
60

1 PRISMA Flow Diagram  
2  
3

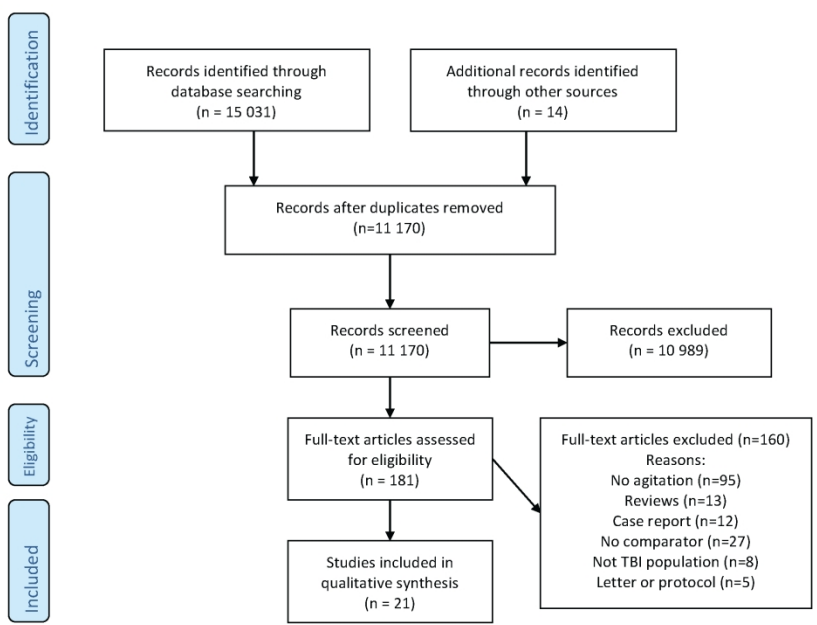

1

215x279mm (300 x 300 DPI)

## Supplementary file: search strategy in MedLine

| Concept | Description of concept    | Research terms                                                                                                                                                                                                                                                                                                                                                                                                                                                                                                                                                                                                                                                                                                                                                                                                                                                                                                                                                                                                                                                                                                                                                                                                                                                                                                                                                                                                                                                                                                                                                                                                                                                                                                                                                                                                                                                 |
|---------|---------------------------|----------------------------------------------------------------------------------------------------------------------------------------------------------------------------------------------------------------------------------------------------------------------------------------------------------------------------------------------------------------------------------------------------------------------------------------------------------------------------------------------------------------------------------------------------------------------------------------------------------------------------------------------------------------------------------------------------------------------------------------------------------------------------------------------------------------------------------------------------------------------------------------------------------------------------------------------------------------------------------------------------------------------------------------------------------------------------------------------------------------------------------------------------------------------------------------------------------------------------------------------------------------------------------------------------------------------------------------------------------------------------------------------------------------------------------------------------------------------------------------------------------------------------------------------------------------------------------------------------------------------------------------------------------------------------------------------------------------------------------------------------------------------------------------------------------------------------------------------------------------|
| A       | Agitation/delirium        | Confusion/ OR Delirium/ OR Psychomotor agitation/ OR attention/ OR hallucinations/ or hallucinat\$.mp OR delirium.mp OR confusion.mp OR Disorientation.mp OR agitation.mp OR confusional.mp OR Restlessness.mp OR Psychomotor Hyperactivity.mp OR Psychomotor Excite\$.mp OR Akathisia.mp OR attention.mp                                                                                                                                                                                                                                                                                                                                                                                                                                                                                                                                                                                                                                                                                                                                                                                                                                                                                                                                                                                                                                                                                                                                                                                                                                                                                                                                                                                                                                                                                                                                                      |
| B       | Traumatic brain injury    | Craniocerebral Trauma/ OR Craniocerebral Traumas.mp OR Craniocerebral Trauma.mp OR Craniocerebral injury.mp OR Craniocerebral injuries.mp OR Head Injury.mp OR Head Injuries.mp OR head trauma.mp OR head traumas.mp OR Parietal Region Trauma.mp OR Parietal Region Traumas.mp OR Skull Injury.mp OR Skull Injuries.mp OR Head Injury.mp OR Head Injuries.mp OR Occipital Region Trauma.mp OR Occipital Region Traumas.mp OR Occipital Trauma.mp OR Occipital Traumas.mp OR Temporal Region Trauma.mp OR Temporal Region Traumas.mp OR Frontal Region Trauma.mp OR Frontal Region Traumas.mp OR Forehead Trauma.mp OR Forehead Traumas.mp OR Brain Concussion.mp OR Brain Concussions.mp OR Diffuse Axonal Injury.mp OR Diffuse Axonal Injuries.mp OR Traumatic Intracranial Hemorrhage.mp OR Traumatic Intracranial Hemorrhages.mp OR Traumatic Intracranial Hematoma.mp OR Traumatic Intracranial Hematomas.mp OR Glasgow Coma Scale/ OR Glasgow Coma scale.mp OR Brain Damage, Chronic/ OR Brain Damage.mp OR Brain Damages.mp<br><br>Epilepsy, Post-Traumatic/ OR Post-Traumatic Epilepsy/ OR Post-Traumatic Epilepsies/ OR Posttraumatic Epilepsy/ OR Posttraumatic Epilepsies.mp OR Post-Traumatic Seizure Disorder.mp OR Post-Traumatic Seizure Disorders.mp OR Posttraumatic Seizure Disorder.mp OR Posttraumatic Seizure Disorders.mp OR Traumatic Epilepsy.mp OR Traumatic Epilepsies.mp OR Traumatic Seizure Disorder.mp OR Traumatic Seizure Disorders.mp OR Late Post-Traumatic Seizure.mp OR Late Post-Traumatic Seizures.mp OR Late Posttraumatic Seizure.mp OR Late Posttraumatic Seizures.mp OR Impact Seizure.mp OR Impact Seizures.mp OR Concussive Convulsion.mp OR Concussive Convulsions.mp OR Early Post-Traumatic Seizure.mp OR Early Post-Traumatic Seizures.mp OR Early Posttraumatic Seizure.mp OR Early Posttraumatic Seizures.mp |
| C       | Pharmacological treatment | Antipsychotic Agents/ OR Tranquilizing Agents/ OR Anti-Anxiety Agents/ OR Antimanic Agents/<br><br>acepromazine OR amoxapine OR asenapine OR azaperone OR benperidol OR butaclamol OR chlorpromazine OR chlorprothixene OR clopenthixol OR clozapine OR droperidol OR flupenthixol OR fluphenazine OR fluspirilene OR haloperidol OR levomepromazine OR loxapine OR loxapine succinate OR mesoridazine OR methiothepin OR methotrimeprazine OR molindone OR olanzapine OR paliperidone OR penfluridol OR perazine OR perphenazine OR pimozone OR prochlorperazine OR promazine OR quetiapine OR remoxipride OR reserpine OR risperidone OR ritanserine OR spiperone OR sulpiride OR thioridazine OR thiothixene OR tiapride hydrochloride OR trifluoperazine OR trifluoperidol OR trifluopromazine OR ziprasidone OR Lithium                                                                                                                                                                                                                                                                                                                                                                                                                                                                                                                                                                                                                                                                                                                                                                                                                                                                                                                                                                                                                                   |

1  
2  
3  
4  
5  
6  
7  
8  
9  
10  
11  
12  
13  
14  
15  
16  
17  
18  
19  
20  
21  
22  
23  
24  
25  
26  
27  
28  
29  
30  
31  
32  
33  
34  
35  
36  
37  
38  
39  
40  
41  
42  
43  
44  
45  
46  
47  
48  
49  
50  
51  
52  
53  
54  
55  
56  
57  
58  
59  
60

Adrenergic alpha-2 Receptor Agonists/ OR OR "Dexmedetomidine/  
Klofenil OR Clofenil OR Chlophazolin OR Clonidine OR "Clonidine  
Dihydrochloride" OR "Clonidine Hydrochloride" OR "Clonidine  
Monohydrochloride" OR "Clonidine Monohydrobromide" OR Guanfacine OR  
Lofexidine OR Gemiton OR Hemiton OR Isoglucon OR Klofelin OR  
Clopheline OR Clofelin OR Catapres OR Catapressan OR Catapresan OR  
Dixarit OR Precedex OR Dixarit  
Adrenergic beta-Antagonists/ OR propranolol OR metoprolol OR pindolol

Central Nervous System Stimulants/

Metadate OR Equasym OR Methylin OR Modafinil OR Concerta OR  
Phenidylate OR Ritalin OR Ritaline OR Tsentedrin OR Centedrin OR Daytrana  
OR "Methylphenidate Hydrochloride"

Amphetamines/

Dopamine Agonists/ OR Dopamine Receptor Agonists/ OR "Dopaminergic  
Agonists" OR dopamine agents/

Amantadine OR Apomorphine OR Bromocriptine OR Metergoline OR  
Piribedil OR Gabapentin OR "Gabapentin enacarbil" OR Neurontin

Anticonvulsants/ OR Anticonvulsive OR "Anti-convulsive" OR Anticonvulsant  
OR Anticonvulsants OR "Anti-convulsant" OR "Anti-convulsants" OR  
Antiepileptic OR Antiepileptics OR "Anti-epileptic" OR "Anti-epileptics"  
"valproic acid" OR carbamazepine OR phenytoin OR lamotrigine OR  
Pregabalin

Antidepressive Agents/ OR Antidepressants OR "Anti-depressant" OR "Anti-  
depressants" OR "Anti-depressive" OR amitryptiline OR desipramine OR  
doxepin OR imipramine

Serotonin Uptake Inhibitors/ OR fluoxetine OR fluvoxamine OR sertraline OR  
citalopram OR Trazodone OR buspirone

Search strategy

« A » & « B » & « C »

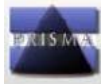

# PRISMA 2009 Checklist

1  
2  
3  
4  
5  
6  
7  
8  
9  
10  
11  
12  
13  
14  
15  
16  
17  
18  
19  
20  
21  
22  
23  
24  
25  
26  
27  
28  
29  
30  
31  
32  
33  
34  
35  
36  
37  
38  
39  
40  
41  
42  
43  
44  
45  
46  
47

| Section/topic                      | #  | Checklist item                                                                                                                                                                                                                                                                                              | Reported on page # |
|------------------------------------|----|-------------------------------------------------------------------------------------------------------------------------------------------------------------------------------------------------------------------------------------------------------------------------------------------------------------|--------------------|
| <b>TITLE</b>                       |    |                                                                                                                                                                                                                                                                                                             |                    |
| Title                              | 1  | Identify the report as a systematic review, meta-analysis, or both.                                                                                                                                                                                                                                         | 1                  |
| <b>ABSTRACT</b>                    |    |                                                                                                                                                                                                                                                                                                             |                    |
| Structured summary                 | 2  | Provide a structured summary including, as applicable: background; objectives; data sources; study eligibility criteria, participants, and interventions; study appraisal and synthesis methods; results; limitations; conclusions and implications of key findings; systematic review registration number. | 3                  |
| <b>INTRODUCTION</b>                |    |                                                                                                                                                                                                                                                                                                             |                    |
| Rationale                          | 3  | Describe the rationale for the review in the context of what is already known.                                                                                                                                                                                                                              | 4                  |
| Objectives                         | 4  | Provide an explicit statement of questions being addressed with reference to participants, interventions, comparisons, outcomes, and study design (PICOS).                                                                                                                                                  | 5                  |
| <b>METHODS</b>                     |    |                                                                                                                                                                                                                                                                                                             |                    |
| Protocol and registration          | 5  | Indicate if a review protocol exists, if and where it can be accessed (e.g., Web address), and, if available, provide registration information including registration number.                                                                                                                               | 5                  |
| Eligibility criteria               | 6  | Specify study characteristics (e.g., PICOS, length of follow-up) and report characteristics (e.g., years considered, language, publication status) used as criteria for eligibility, giving rationale.                                                                                                      | 5                  |
| Information sources                | 7  | Describe all information sources (e.g., databases with dates of coverage, contact with study authors to identify additional studies) in the search and date last searched.                                                                                                                                  | 6                  |
| Search                             | 8  | Present full electronic search strategy for at least one database, including any limits used, such that it could be repeated.                                                                                                                                                                               | 6                  |
| Study selection                    | 9  | State the process for selecting studies (i.e., screening, eligibility, included in systematic review, and, if applicable, included in the meta-analysis).                                                                                                                                                   | 6                  |
| Data collection process            | 10 | Describe method of data extraction from reports (e.g., piloted forms, independently, in duplicate) and any processes for obtaining and confirming data from investigators.                                                                                                                                  | 7                  |
| Data items                         | 11 | List and define all variables for which data were sought (e.g., PICOS, funding sources) and any assumptions and simplifications made.                                                                                                                                                                       | 7                  |
| Risk of bias in individual studies | 12 | Describe methods used for assessing risk of bias of individual studies (including specification of whether this was done at the study or outcome level), and how this information is to be used in any data synthesis.                                                                                      | 8                  |
| Summary measures                   | 13 | State the principal summary measures (e.g., risk ratio, difference in means).                                                                                                                                                                                                                               | N/A                |
| Synthesis of results               | 14 | Describe the methods of handling data and combining results of studies, if done, including measures of consistency (e.g., I <sup>2</sup> ) for each meta-analysis.                                                                                                                                          | N/A                |

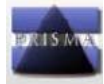

# PRISMA 2009 Checklist

Page 1 of 2

| Section/topic                 | #  | Checklist item                                                                                                                                                                                           | Reported on page # |
|-------------------------------|----|----------------------------------------------------------------------------------------------------------------------------------------------------------------------------------------------------------|--------------------|
| Risk of bias across studies   | 15 | Specify any assessment of risk of bias that may affect the cumulative evidence (e.g., publication bias, selective reporting within studies).                                                             | 13                 |
| Additional analyses           | 16 | Describe methods of additional analyses (e.g., sensitivity or subgroup analyses, meta-regression), if done, indicating which were pre-specified.                                                         | N/A                |
| <b>RESULTS</b>                |    |                                                                                                                                                                                                          |                    |
| Study selection               | 17 | Give numbers of studies screened, assessed for eligibility, and included in the review, with reasons for exclusions at each stage, ideally with a flow diagram.                                          | 8                  |
| Study characteristics         | 18 | For each study, present characteristics for which data were extracted (e.g., study size, PICOS, follow-up period) and provide the citations.                                                             | Table 1            |
| Risk of bias within studies   | 19 | Present data on risk of bias of each study and, if available, any outcome level assessment (see item 12).                                                                                                | Table 5            |
| Results of individual studies | 20 | For all outcomes considered (benefits or harms), present, for each study: (a) simple summary data for each intervention group (b) effect estimates and confidence intervals, ideally with a forest plot. | Tables 3 and 4     |
| Synthesis of results          | 21 | Present results of each meta-analysis done, including confidence intervals and measures of consistency.                                                                                                  | N/A                |
| Risk of bias across studies   | 22 | Present results of any assessment of risk of bias across studies (see Item 15).                                                                                                                          | Table 5            |
| Additional analysis           | 23 | Give results of additional analyses, if done (e.g., sensitivity or subgroup analyses, meta-regression [see Item 16]).                                                                                    | N/A                |
| <b>DISCUSSION</b>             |    |                                                                                                                                                                                                          |                    |
| Summary of evidence           | 24 | Summarize the main findings including the strength of evidence for each main outcome; consider their relevance to key groups (e.g., healthcare providers, users, and policy makers).                     | 13-16              |
| Limitations                   | 25 | Discuss limitations at study and outcome level (e.g., risk of bias), and at review-level (e.g., incomplete retrieval of identified research, reporting bias).                                            | 16                 |
| Conclusions                   | 26 | Provide a general interpretation of the results in the context of other evidence, and implications for future research.                                                                                  | 17                 |
| <b>FUNDING</b>                |    |                                                                                                                                                                                                          |                    |
| Funding                       | 27 | Describe sources of funding for the systematic review and other support (e.g., supply of data); role of funders for the systematic review.                                                               | 1                  |

From: Moher D, Liberati A, Tetzlaff J, Altman DG, The PRISMA Group (2009). Preferred Reporting Items for Systematic Reviews and Meta-Analyses: The PRISMA Statement. PLoS Med 6(7): e1000097. doi:10.1371/journal.pmed1000097

For more information, visit: [www.prisma-statement.org](http://www.prisma-statement.org).
